# Supplementary material for: Engineered heart muscle allografts for heart repair in primates and humans
Source: Nature. 2025 Jan 29;639(8054):503–11. doi: 10.1038/s41586-024-08463-0 (PMC11903342; doi:10.1038/s41586-024-08463-0)
Supplement: Supplementary file 4 — Therapeutic drug monitoring: calcineurin inhibitors. [file 41586_2024_8463_MOESM4_ESM.xlsx]

## Sheet: TDM Calcineurin Inhibitors
Tacrolimus concentration in ng/mL (target trough concentration 5-15 ng/mL)
			Days post EHM implantation
	Macaque	Pre	0	8	15	28	42	56	71	84	112	140	168
Cohort 1	#2444	0	3.7	4.3	12.4	21.4	12.9	13.5	12.3	10.3
	#2529	0	15.7	12.7	13.8	15.2	14.5	15.8	17.5	16.5
	#2441	0	11.7	7.8	5.5	12.7	12.2	10.6	11.4	10.1
	#2616	0	8.2	6.1	8.5	9.9	10.5	7.8	11.4	9.4
	#2520	0	12.2	8.4	10.7	12.1	13.7	13.9	11.9	11.6
	#2551	0	16.8	7.6	9.5	11.7	14	12.2	13.4	11.4
Cohort 2	#2506	0	12.5	8.2	9.5	15.7	14	13.3	12.8	12	12.9	10.1	7.8
	#2913	0	13.1	6.6	9.4	14.4	14.5	14.1	17.8	15.1	13.4	10.1	10
	#2909	0	8.8	5.6	9.3	11.4	11.4	8.4	12.3	9.3	8.8	9.5	8
	#2887	0	8.6	4.4	8.3	11.1	13.2	13.3	15.4	12.1	0	0	0
	#2869	0	26.2	5.1	13.2	16.1	12.5	14.2	12	11.5	0	0	0
Cylcosporine concentration in ng/mL (target trough concentration 140-250 ng/mL)
			Days post EHM implantation
	Macaque	Pre	0	8	15	28	42	56	71	84	112	140	168
Cohort 2	#2915	0	96	813	958	688	518	402	432	222	250	192	231
Tacrolimus concentration in ng/mL (target trough concentration 5-25 ng/mL)
			Days post EHM implantation
	Group	Macaque	0	7	14	26	41	55	70	84	112	141	166
Cohort 3	Ctr. w/o ISP	#2651	0	0	0	0	0	0	0	0	0	0	0
		#2762	0	0	0	0	0	0	0	0	0	0	0
		#2868	0	0	0	0	0	0	0	0	0	0	0
	Ctr. +ISP	#2650	5.1	17.6	14.3	14.6	15.6	14.6	13.6	12.1	16.8	16.9	13.3
		#2750	19	15.7	15	16.3	12.6	15.4	12.5	23.5	17.5	18.9	16.5
		#16299	21.9	17.2	n.d.	21	17.2	25.8	13.6	34.1	20.3	27.7	15.5
		#2735	21.5	21.3	18.2	16.2	19.8	18.2	17.6	21.9	18.3	16.5	16
	2x EHM	#2907	20.6	8.3	13.9	20.9	15.6	14	14.1	17.3	13.1	17.6	17.7
		#16356	18.8	9.7	18	21	20.9	27	14.1	26.8	26.1	24.2	35.9
		#16721	30.6	34.7	23.3	28.2	13.6	25.4	28.2	19.2	30.1	19.9	23.8
	5x EHM	#2819	22.3	21.3	15.5	20.7	13.6	14.9	13.2	9.8	8.4	10.5	8.3
		#2884	24.9	11.8	24.4	28.5	18.8	13.4	11.3	10.2	10.2	10.1	10.8
		#16441	22.3	14.4	18.5	28.8	20.4	26.1	19.1	18.4	20.5	17.9	19.1
