# Supplementary material for: Engineered heart muscle allografts for heart repair in primates and humans
Source: Nature. 2025 Jan 29;639(8054):503–11. doi: 10.1038/s41586-024-08463-0 (PMC11903342; doi:10.1038/s41586-024-08463-0)
Supplement: Supplementary file 5 — Donor-specific antibodies (DSA). [file 41586_2024_8463_MOESM5_ESM.xlsx]

## Sheet: DSA Cohort 1
	Group	Macaque	EHM Dose	Type		Cohort 1			Baseline					EHM					1 weeks					2 weeks					4 weeks					6 weeks					8 weeks					10 weeks					12 weeks
Cohort 1	Tacro + MP	#2444	1x EHM	Allograft				Serum (Dilution)	1:5	1:10	1:20	1:40		1:5	1:10	1:20	1:40		1:5	1:10	1:20	1:40		1:5	1:10	1:20	1:40		1:5	1:10	1:20	1:40		1:5	1:10	1:20	1:40		1:5	1:10	1:20	1:40		1:5	1:10	1:20	1:40		1:5
	Tacrolimus	#2529	1x EHM	Allograft			#2444	anti-Rhesus IgG (mean fluorescence intensity [MFI] displayed as geometric mean)
	Tacro + MP	#2441	1x EHM	Allograft				CM	1.1	2.7	16.7	11.9		0	9.4	13.1	12.9		2.7	17.8	17.8	8.2		0	6.5	19.4	16.8		4.6	13.6	21.5	17.9		0	0.2	16.2	13.8		4.7	6.9	29.6	28		11.4	10.4	17.2	20.2		2.5
	Tacrolimus	#2616	1x EHM	Allograft				CM + IFNγ	0	3.4	20.3	16		0	19.2	28.6	9.9		4.1	8.9	22.9	19.9		0	17	23.4	22.9		4.4	10.9	29.5	25		3.5	11	23.3	15.4		30	32.5	130.7	64.7		18.5	34.8	119.7	50.7		18.7
	Tacro + MP	#2520	1x EHM	Allograft
	Tacro + MP	#2551	1x EHM	Allograft				anti-Rhesus IgG (number of positive cardiomyocytes in % [% CM] displayed as geometric mean)
	no ISP	#2483	1x EHM	Autograft				CM	0.18	0.19	0.78	0.34		0.09	0.43	0.36	0.56		0.16	0.72	0.68	0.22		0.08	0.34	0.6	0.4		0.27	0.53	0.91	0.55		0.03	0.29	0.45	0.39		0.09	0.31	1.94	1.22		0.18	0.3	0.59	0.79		0.028
								CM + IFNγ	0.12	0.28	0.88	0.62		0.03	0.75	0.5	0.21		0.17	0.43	0.92	0.72		0.1	0.62	0.61	0.91		0.15	0.43	1.21	0.9		0.15	0.49	0.87	0.6		2.32	3.52	17.9	4.76		1.31	2.81	15.6	3.65		1.12
								MHC class I inducibility			CM	CM + IFNγ
								MFI			602.2	3320
								% CM			78.48	97.66
									Baseline					EHM					1 weeks					2 weeks					4 weeks					6 weeks					8 weeks					10 weeks					12 weeks
								Serum (Dilution)	1:5	1:10	1:20	1:40		1:5	1:10	1:20	1:40		1:5	1:10	1:20	1:40		1:5	1:10	1:20	1:40		1:5	1:10	1:20	1:40		1:5	1:10	1:20	1:40		1:5	1:10	1:20	1:40		1:5	1:10	1:20	1:40		1:5
							#2529	anti-Rhesus IgG (mean fluorescence intensity [MFI] displayed as geometric mean)
								CM	18.89	2.17	2.83	0		4.79	5.88	2.13	1.79		6.13	5.2	0	0.27		7.84	4.39	2.86	0.4		9.11	6.36	1.79	2.21		8.78	6.62	3.86	1.66		11.38	4.51	5.07	4.35		11.26	7.4	4.08	1.41		17.45
								CM + IFNγ	21.14	6.31	4.64	0		1.17	3.65	1.37	1.37		8.56	4.68	0.57	3.26		3.81	3.43	2.81	4.05		6.23	5.21	5.74	3.71		15.38	20.27	19.61	9.91		30.97	17.67	15.41	5.77		30.34	23.98	13.31	5.32		31.51
								anti-Rhesus IgG (number of positive cardiomyocytes in % [% CM] displayed as geometric mean)
								CM	4.08	1.72	1.48	0.3		1.02	2	1.04	1.68		1.47	2.02	0.37	0.35		1.71	1.86	1.51	0.41		1.88	2.3	0.94	1.24		4.08	2.24	2.33	1.15		5.73	2.3	2.48	2.49		2.89	4.45	1.37	0.91		6.87
								CM + IFNγ	4.5	2.68	2.53	0		0.21	1.91	0.94	0.94		3.25	1.88	0.26	2.12		3.37	2.79	1.69	6.46		1.59	4.42	11.64	3.63		45.71	57.62	60.51	29.48		63.72	48.58	46.76	15.26		70.12	64.31	42.2	11.81		66.74
								MHC class I inducibility			CM	CM + IFNγ
								MFI			2685	16313
								% CM			87.94	97.36
									Baseline					EHM					1 weeks					2 weeks					4 weeks					6 weeks					8 weeks					10 weeks					12 weeks
								Serum (Dilution)	1:5	1:10	1:20	1:40		1:5	1:10	1:20	1:40		1:5	1:10	1:20	1:40		1:5	1:10	1:20	1:40		1:5	1:10	1:20	1:40		1:5	1:10	1:20	1:40		1:5	1:10	1:20	1:40		1:5	1:10	1:20	1:40		1:5
							#2441	anti-Rhesus IgG (mean fluorescence intensity [MFI] displayed as geometric mean)
								CM	46.6	86.6	45.6	8.6		29.6	69.6	66.6	25.6		48.6	93.6	73.6	63.6		16.6	46.6	97.6	69.6		20.6	95.6	97.6	93.6		14.6	62.6	68.6	49.6		31.6	89.6	67.6	62.6		50.6	71.6	112.6	75.6		104.6
								CM + IFNγ	36.1	55.1	39.1	28.1		9.1	58.1	61.1	55.1		3.7	60.1	48.1	48.1		8.1	66.1	62.1	72.1		9.1	57.1	61.1	55.1		3.9	82.1	58.1	31.1		14.1	73.1	52.1	42.1		45.1	61.1	85.1	61.1		32.1
								anti-Rhesus IgG (number of positive cardiomyocytes in % [% CM] displayed as geometric mean)
								CM	2.37	6	2.23	0.26		1.87	4.9	4.4	1.92		2.93	5.7	5	4.16		0.25	2.3	6.5	4.14		0.4	6.6	5.8	5.7		0.72	3.68	3.18	2.72		2.03	8.6	5.2	5.5		7.4	11.3	17.9	10.3		19.4
								CM + IFNγ	2.21	2.46	1.54	1.4		0.74	2.81	2.61	2.42		0.41	2.45	1.9	1.64		0.16	2.88	2.32	2.91		0.35	2.36	2.49	2.11		0.15	3.95	2.49	1.38		0.5	3.01	2.9	1.78		4.71	5.87	7.5	3.9		2.84
								MHC class I inducibility			CM	CM + IFNγ
								MFI			515	6115
								% CM			79.69	98.52
									Baseline					EHM					1 weeks					2 weeks					4 weeks					6 weeks					8 weeks					10 weeks					12 weeks
								Serum (Dilution)	1:5	1:10	1:20	1:40		1:5	1:10	1:20	1:40		1:5	1:10	1:20	1:40		1:5	1:10	1:20	1:40		1:5	1:10	1:20	1:40		1:5	1:10	1:20	1:40		1:5	1:10	1:20	1:40		1:5	1:10	1:20	1:40		1:5
							#2616	anti-Rhesus IgG (mean fluorescence intensity [MFI] displayed as geometric mean)
								CM	3.8	8.4	15.4	11.4		0	11.4	16.4	18.4		2.3	11.4	22.4	15.4		5.5	12.4	30.4	16.4		12.4	9.4	30.4	28.4		8.4	15.4	33.4	23.4		0	17.4	14.4	21.4		0	15.4	33.4	33.4		9.4
								CM + IFNγ	12.8	45.8	36.8	21.8		22.8	51.8	49.8	8.8		19.8	46.8	40.8	20.8		28.8	40.8	45.8	27.8		3.7	47.8	38.8	20.8		3.4	27.8	33.8	41.8		26.8	46.8	40.8	19.8		0	32.8	29.8	16.8		1
								anti-Rhesus IgG (number of positive cardiomyocytes in % [% CM] displayed as geometric mean)
								CM	0.05	0.21	0.4	0.18		0	0.21	0.22	0.21		0	0.32	0.41	0.26		0.01	0.38	0.71	0.39		0.27	0.2	0.63	0.91		0.22	0.44	0.47	0.22		0.01	0.48	0.45	0.25		0	0.14	0.96	0.72		0.08
								CM + IFNγ	0.43	1.84	1.21	0.69		0.77	2.42	1.92	0.37		0.76	1.78	1.31	0.37		0.82	1.78	1.11	0.5		0.05	1.94	1.04	0.36		0	1	1.04	1.23		0.82	1.64	1.15	0.43		0	1.15	0.73	0.46		0.02
								MHC class I inducibility			CM	CM + IFNγ
								MFI			1114	4394
								% CM			87.8	97.22
									Baseline					EHM					1 weeks					2 weeks					4 weeks					6 weeks					8 weeks					10 weeks					12 weeks
								Serum (Dilution)	1:5	1:10	1:20	1:40		1:5	1:10	1:20	1:40		1:5	1:10	1:20	1:40		1:5	1:10	1:20	1:40		1:5	1:10	1:20	1:40		1:5	1:10	1:20	1:40		1:5	1:10	1:20	1:40		1:5	1:10	1:20	1:40		1:5
							#2520	anti-Rhesus IgG (mean fluorescence intensity [MFI] displayed as geometric mean)
								CM	4.9	11.7	15.8	29.2		1.1	8.8	15.6	13.5		8.5	2.6	22.3	18.9		3.3	16.5	19.2	23.8		8.2	15.9	28.4	18.7		2.9	9.1	37	24.1		4.5	10.8	32.5	26.7		5.1	6.2	29	22.4		6
								CM + IFNγ	3	4.6	26.4	22.4		0.6	27.5	16	12.4		5.7	17.5	18.3	21.6		0	24.2	26.4	29.1		1	19	20.8	19.5		0	17.9	31.8	25.9		2.8	14.7	31.2	22.5		0	3	30.7	28.3		0
								anti-Rhesus IgG (number of positive cardiomyocytes in % [% CM] displayed as geometric mean)
								CM	0.19	0.56	0.58	0.86		0.18	0.47	0.61	0.39		0.2	0.22	0.64	0.47		0.15	0.68	0.66	0.71		0.38	0.48	0.67	0.36		0.1	0.36	0.64	0.48		0.18	0.33	0.84	0.68		0.15	0.26	0.72	0.43		0.18
								CM + IFNγ	0.44	0.32	0.85	0.86		0.42	0.88	0.61	0.61		0.35	0.75	0.59	0.83		0.21	0.89	1.11	0.91		0.4	0.81	0.74	0.59		0.22	0.78	0.82	0.69		0.34	0.59	0.88	0.75		0.27	0.5	0.84	0.79		0.15
								MHC class I inducibility			CM	CM + IFNγ
								MFI			668	4874.3
								% CM			83.66	97.87
									Baseline					EHM					1 weeks					2 weeks					4 weeks					6 weeks					8 weeks					10 weeks					12 weeks
								Serum (Dilution)	1:5	1:10	1:20	1:40		1:5	1:10	1:20	1:40		1:5	1:10	1:20	1:40		1:5	1:10	1:20	1:40		1:5	1:10	1:20	1:40		1:5	1:10	1:20	1:40		1:5	1:10	1:20	1:40		1:5	1:10	1:20	1:40		1:5
							#2551	anti-Rhesus IgG (mean fluorescence intensity [MFI] displayed as geometric mean)
								CM	3	25.2	23.1	15.2		8.1	24	24.1	22.4		5.3	24	23.3	21.7		37.1	34.1	36.1	24.6		12	17.5	35.2	25.6		16.1	36.1	30.7	25.3		11	14.3	23.2	34.9		2.9	13.4	36	39.6		19.4
								CM + IFNγ	9.1	6.7	19.5	55.7		12.6	28.7	33.7	19.8		2.7	24.7	18.8	34.7		3.2	14.1	29.7	41.7		0	9.1	35.7	22.2		18.5	8.5	24.7	23.4		4	6.8	25.7	34.7		8.1	7.2	27.7	27.7		2.5
								anti-Rhesus IgG (number of positive cardiomyocytes in % [% CM] displayed as geometric mean)
								CM	0.28	1.31	1.27	0.88		0.45	1.24	1.2	1.06		0.33	1.27	1.16	0.87		0.77	1.51	1.28	0.99		0.57	1.01	1.28	0.92		0.71	1.31	1.23	1.04		0.37	0.68	1.16	1.26		0.27	0.92	1.4	1.34		0.9
								CM + IFNγ	0.52	0.46	0.98	2.47		0.73	1.33	1.5	1.09		0.21	1.11	1.11	1.31		0.4	0.7	1.09	1.72		0.16	0.63	1.63	0.88		0.81	0.7	1.18	0.8		0.39	0.68	1.01	1.41		0.41	0.39	1.31	1.18		0.27
								MHC class I inducibility			CM	CM + IFNγ
								MFI			444.6	5546
								% CM			71.58	98.32
									Baseline					EHM					1 weeks					2 weeks					4 weeks					6 weeks					8 weeks					10 weeks					12 weeks
								Serum (Dilution)	1:5	1:10	1:20	1:40		1:5	1:10	1:20	1:40		1:5	1:10	1:20	1:40		1:5	1:10	1:20	1:40		1:5	1:10	1:20	1:40		1:5	1:10	1:20	1:40		1:5	1:10	1:20	1:40		1:5	1:10	1:20	1:40		1:5
							#2483	anti-Rhesus IgG (mean fluorescence intensity [MFI] displayed as geometric mean)
								CM	0	0	0	0		n.d.	n.d.	n.d.	n.d.		n.d.	n.d.	n.d.	n.d.		n.d.	n.d.	n.d.	n.d.		n.d.	n.d.	n.d.	n.d.		n.d.	n.d.	n.d.	n.d.		n.d.	n.d.	n.d.	n.d.		n.d.	n.d.	n.d.	n.d.		0
								CM + IFNγ	0.52	0	0.22	0		n.d.	n.d.	n.d.	n.d.		n.d.	n.d.	n.d.	n.d.		n.d.	n.d.	n.d.	n.d.		n.d.	n.d.	n.d.	n.d.		n.d.	n.d.	n.d.	n.d.		n.d.	n.d.	n.d.	n.d.		n.d.	n.d.	n.d.	n.d.		0.21
								anti-Rhesus IgG (number of positive cardiomyocytes in % [% CM] displayed as geometric mean)
								CM	0.34	0	0	0		n.d.	n.d.	n.d.	n.d.		n.d.	n.d.	n.d.	n.d.		n.d.	n.d.	n.d.	n.d.		n.d.	n.d.	n.d.	n.d.		n.d.	n.d.	n.d.	n.d.		n.d.	n.d.	n.d.	n.d.		n.d.	n.d.	n.d.	n.d.		0.02
								CM + IFNγ	0.33	0.07	0	1.83		n.d.	n.d.	n.d.	n.d.		n.d.	n.d.	n.d.	n.d.		n.d.	n.d.	n.d.	n.d.		n.d.	n.d.	n.d.	n.d.		n.d.	n.d.	n.d.	n.d.		n.d.	n.d.	n.d.	n.d.		n.d.	n.d.	n.d.	n.d.		0.28
								MHC class I inducibility			CM	CM + IFNγ
								MFI			207.01	1268.37
								% CM			88.94	90.86
				Summary (Extended Data Figure 4i)
				anti-Rhesus IgG (mean fluorescence intensity [MFI] displayed as geometric mean)
				CM					Baseline					EHM					1 weeks					2 weeks					4 weeks					6 weeks					8 weeks					10 weeks					12 weeks
					Group	Macaque	EHM Dose	Type	1:5	1:10	1:20	1:40		1:5	1:10	1:20	1:40		1:5	1:10	1:20	1:40		1:5	1:10	1:20	1:40		1:5	1:10	1:20	1:40		1:5	1:10	1:20	1:40		1:5	1:10	1:20	1:40		1:5	1:10	1:20	1:40		1:5
				Cohort 1	Tacro + MP	#2444	1x EHM	Allograft	1.1	2.7	16.7	11.9		0	9.4	13.1	12.9		2.7	17.8	17.8	8.2		0	6.5	19.4	16.8		4.6	13.6	21.5	17.9		0	0.2	16.2	13.8		4.7	6.9	29.6	28		11.4	10.4	17.2	20.2		2.5
					Tacrolimus	#2529	1x EHM	Allograft	18.89	2.17	2.83	0		4.79	5.88	2.13	1.79		6.13	5.2	0	0.27		7.84	4.39	2.86	0.4		9.11	6.36	1.79	2.21		8.78	6.62	3.86	1.66		11.38	4.51	5.07	4.35		11.26	7.4	4.08	1.41		17.45
					Tacro + MP	#2441	1x EHM	Allograft	46.6	86.6	45.6	8.6		29.6	69.6	66.6	25.6		48.6	93.6	73.6	63.6		16.6	46.6	97.6	69.6		20.6	95.6	97.6	93.6		14.6	62.6	68.6	49.6		31.6	89.6	67.6	62.6		50.6	71.6	112.6	75.6		104.6
					Tacrolimus	#2616	1x EHM	Allograft	3.8	8.4	15.4	11.4		0	11.4	16.4	18.4		2.3	11.4	22.4	15.4		5.5	12.4	30.4	16.4		12.4	9.4	30.4	28.4		8.4	15.4	33.4	23.4		0	17.4	14.4	21.4		0	15.4	33.4	33.4		9.4
					Tacro + MP	#2520	1x EHM	Allograft	4.9	11.7	15.8	29.2		1.1	8.8	15.6	13.5		8.5	2.6	22.3	18.9		3.3	16.5	19.2	23.8		8.2	15.9	28.4	18.7		2.9	9.1	37	24.1		4.5	10.8	32.5	26.7		5.1	6.2	29	22.4		6
					Tacro + MP	#2551	1x EHM	Allograft	3	25.2	23.1	15.2		8.1	24	24.1	22.4		5.3	24	23.3	21.7		37.1	34.1	36.1	24.6		12	17.5	35.2	25.6		16.1	36.1	30.7	25.3		11	14.3	23.2	34.9		2.9	13.4	36	39.6		19.4
					no ISP	#2483	1x EHM	Autograft	0	0	0	0		n.d.	n.d.	n.d.	n.d.		n.d.	n.d.	n.d.	n.d.		n.d.	n.d.	n.d.	n.d.		n.d.	n.d.	n.d.	n.d.		n.d.	n.d.	n.d.	n.d.		n.d.	n.d.	n.d.	n.d.		n.d.	n.d.	n.d.	n.d.		0
				anti-Rhesus IgG (mean fluorescence intensity [MFI] displayed as geometric mean)
				CM + IFNγ					Baseline					EHM					1 weeks					2 weeks					4 weeks					6 weeks					8 weeks					10 weeks					12 weeks
					Group	Macaque	EHM Dose	Type	1:5	1:10	1:20	1:40		1:5	1:10	1:20	1:40		1:5	1:10	1:20	1:40		1:5	1:10	1:20	1:40		1:5	1:10	1:20	1:40		1:5	1:10	1:20	1:40		1:5	1:10	1:20	1:40		1:5	1:10	1:20	1:40		1:5
				Cohort 1	Tacro + MP	#2444	1x EHM	Allograft	0	3.4	20.3	16		0	19.2	28.6	9.9		4.1	8.9	22.9	19.9		0	17	23.4	22.9		4.4	10.9	29.5	25		3.5	11	23.3	15.4		30	32.5	130.7	64.7		18.5	34.8	119.7	50.7		18.7
					Tacrolimus	#2529	1x EHM	Allograft	21.14	6.31	4.64	0		1.17	3.65	1.37	1.37		8.56	4.68	0.57	3.26		3.81	3.43	2.81	4.05		6.23	5.21	5.74	3.71		15.38	20.27	19.61	9.91		30.97	17.67	15.41	5.77		30.34	23.98	13.31	5.32		31.51
					Tacro + MP	#2441	1x EHM	Allograft	36.1	55.1	39.1	28.1		9.1	58.1	61.1	55.1		3.7	60.1	48.1	48.1		8.1	66.1	62.1	72.1		9.1	57.1	61.1	55.1		3.9	82.1	58.1	31.1		14.1	73.1	52.1	42.1		45.1	61.1	85.1	61.1		32.1
					Tacrolimus	#2616	1x EHM	Allograft	12.8	45.8	36.8	21.8		22.8	51.8	49.8	8.8		19.8	46.8	40.8	20.8		28.8	40.8	45.8	27.8		3.7	47.8	38.8	20.8		3.4	27.8	33.8	41.8		26.8	46.8	40.8	19.8		0	32.8	29.8	16.8		1
					Tacro + MP	#2520	1x EHM	Allograft	3	4.6	26.4	22.4		0.6	27.5	16	12.4		5.7	17.5	18.3	21.6		0	24.2	26.4	29.1		1	19	20.8	19.5		0	17.9	31.8	25.9		2.8	14.7	31.2	22.5		0	3	30.7	28.3		0
					Tacro + MP	#2551	1x EHM	Allograft	9.1	6.7	19.5	55.7		12.6	28.7	33.7	19.8		2.7	24.7	18.8	34.7		3.2	14.1	29.7	41.7		0	9.1	35.7	22.2		18.5	8.5	24.7	23.4		4	6.8	25.7	34.7		8.1	7.2	27.7	27.7		2.5
					no ISP	#2483	1x EHM	Autograft	0.52	0	0.22	0		n.d.	n.d.	n.d.	n.d.		n.d.	n.d.	n.d.	n.d.		n.d.	n.d.	n.d.	n.d.		n.d.	n.d.	n.d.	n.d.		n.d.	n.d.	n.d.	n.d.		n.d.	n.d.	n.d.	n.d.		n.d.	n.d.	n.d.	n.d.		0.21
				anti-Rhesus IgG (number of positive cardiomyocytes in % [% CM] displayed as geometric mean)
				CM					Baseline					EHM					1 weeks					2 weeks					4 weeks					6 weeks					8 weeks					10 weeks					12 weeks
					Group	Macaque	EHM Dose	Type	1:5	1:10	1:20	1:40		1:5	1:10	1:20	1:40		1:5	1:10	1:20	1:40		1:5	1:10	1:20	1:40		1:5	1:10	1:20	1:40		1:5	1:10	1:20	1:40		1:5	1:10	1:20	1:40		1:5	1:10	1:20	1:40		1:5
				Cohort 1	Tacro + MP	#2444	1x EHM	Allograft	0.18	0.19	0.78	0.34		0.09	0.43	0.36	0.56		0.16	0.72	0.68	0.22		0.08	0.34	0.6	0.4		0.27	0.53	0.91	0.55		0.03	0.29	0.45	0.39		0.09	0.31	1.94	1.22		0.18	0.3	0.59	0.79		0.028
					Tacrolimus	#2529	1x EHM	Allograft	4.08	1.72	1.48	0.3		1.02	2	1.04	1.68		1.47	2.02	0.37	0.35		1.71	1.86	1.51	0.41		1.88	2.3	0.94	1.24		4.08	2.24	2.33	1.15		5.73	2.3	2.48	2.49		2.89	4.45	1.37	0.91		6.87
					Tacro + MP	#2441	1x EHM	Allograft	2.37	6	2.23	0.26		1.87	4.9	4.4	1.92		2.93	5.7	5	4.16		0.25	2.3	6.5	4.14		0.4	6.6	5.8	5.7		0.72	3.68	3.18	2.72		2.03	8.6	5.2	5.5		7.4	11.3	17.9	10.3		19.4
					Tacrolimus	#2616	1x EHM	Allograft	0.05	0.21	0.4	0.18		0	0.21	0.22	0.21		0	0.32	0.41	0.26		0.01	0.38	0.71	0.39		0.27	0.2	0.63	0.91		0.22	0.44	0.47	0.22		0.01	0.48	0.45	0.25		0	0.14	0.96	0.72		0.08
					Tacro + MP	#2520	1x EHM	Allograft	0.19	0.56	0.58	0.86		0.18	0.47	0.61	0.39		0.2	0.22	0.64	0.47		0.15	0.68	0.66	0.71		0.38	0.48	0.67	0.36		0.1	0.36	0.64	0.48		0.18	0.33	0.84	0.68		0.15	0.26	0.72	0.43		0.18
					Tacro + MP	#2551	1x EHM	Allograft	0.28	1.31	1.27	0.88		0.45	1.24	1.2	1.06		0.33	1.27	1.16	0.87		0.77	1.51	1.28	0.99		0.57	1.01	1.28	0.92		0.71	1.31	1.23	1.04		0.37	0.68	1.16	1.26		0.27	0.92	1.4	1.34		0.9
					no ISP	#2483	1x EHM	Autograft	0.34	0	0	0		n.d.	n.d.	n.d.	n.d.		n.d.	n.d.	n.d.	n.d.		n.d.	n.d.	n.d.	n.d.		n.d.	n.d.	n.d.	n.d.		n.d.	n.d.	n.d.	n.d.		n.d.	n.d.	n.d.	n.d.		n.d.	n.d.	n.d.	n.d.		0.02
				anti-Rhesus IgG (number of positive cardiomyocytes in % [% CM] displayed as geometric mean)
				CM + IFNγ					Baseline					EHM					1 weeks					2 weeks					4 weeks					6 weeks					8 weeks					10 weeks					12 weeks
					Group	Macaque	EHM Dose	Type	1:5	1:10	1:20	1:40		1:5	1:10	1:20	1:40		1:5	1:10	1:20	1:40		1:5	1:10	1:20	1:40		1:5	1:10	1:20	1:40		1:5	1:10	1:20	1:40		1:5	1:10	1:20	1:40		1:5	1:10	1:20	1:40		1:5
				Cohort 1	Tacro + MP	#2444	1x EHM	Allograft	0.12	0.28	0.88	0.62		0.03	0.75	0.5	0.21		0.17	0.43	0.92	0.72		0.1	0.62	0.61	0.91		0.15	0.43	1.21	0.9		0.15	0.49	0.87	0.6		2.32	3.52	17.9	4.76		1.31	2.81	15.6	3.65		1.12
					Tacrolimus	#2529	1x EHM	Allograft	4.5	2.68	2.53	0		0.21	1.91	0.94	0.94		3.25	1.88	0.26	2.12		3.37	2.79	1.69	6.46		1.59	4.42	11.64	3.63		45.71	57.62	60.51	29.48		63.72	48.58	46.76	15.26		70.12	64.31	42.2	11.81		66.74
					Tacro + MP	#2441	1x EHM	Allograft	2.21	2.46	1.54	1.4		0.74	2.81	2.61	2.42		0.41	2.45	1.9	1.64		0.16	2.88	2.32	2.91		0.35	2.36	2.49	2.11		0.15	3.95	2.49	1.38		0.5	3.01	2.9	1.78		4.71	5.87	7.5	3.9		2.84
					Tacrolimus	#2616	1x EHM	Allograft	0.43	1.84	1.21	0.69		0.77	2.42	1.92	0.37		0.76	1.78	1.31	0.37		0.82	1.78	1.11	0.5		0.05	1.94	1.04	0.36		0	1	1.04	1.23		0.82	1.64	1.15	0.43		0	1.15	0.73	0.46		0.02
					Tacro + MP	#2520	1x EHM	Allograft	0.44	0.32	0.85	0.86		0.42	0.88	0.61	0.61		0.35	0.75	0.59	0.83		0.21	0.89	1.11	0.91		0.4	0.81	0.74	0.59		0.22	0.78	0.82	0.69		0.34	0.59	0.88	0.75		0.27	0.5	0.84	0.79		0.15
					Tacro + MP	#2551	1x EHM	Allograft	0.52	0.46	0.98	2.47		0.73	1.33	1.5	1.09		0.21	1.11	1.11	1.31		0.4	0.7	1.09	1.72		0.16	0.63	1.63	0.88		0.81	0.7	1.18	0.8		0.39	0.68	1.01	1.41		0.41	0.39	1.31	1.18		0.27
					no ISP	#2483	1x EHM	Autograft	0.33	0.07	0	1.83		n.d.	n.d.	n.d.	n.d.		n.d.	n.d.	n.d.	n.d.		n.d.	n.d.	n.d.	n.d.		n.d.	n.d.	n.d.	n.d.		n.d.	n.d.	n.d.	n.d.		n.d.	n.d.	n.d.	n.d.		n.d.	n.d.	n.d.	n.d.		0.28
				MFI	CM	CM + IFNγ		% total cells	CM	CM + IFNγ
				#2444	602.2	3320		#2444	78.48	97.66
				#2529	2685	16313		#2529	87.94	97.36
				#2441	515	6115		#2441	79.69	98.52
				#2616	1114	4394		#2616	87.8	97.22
				#2520	668	4874.3		#2520	83.66	97.87
				#2551	444.6	5546		#2551	71.58	98.32
				#2483	207.01	1268.37		#2483	88.94	90.86
				Mean	890.83	5975.81		Mean	82.5843	96.83
				SD	837.635	4830.29		SD	6.37385	2.67459
				SEM	316.596	1825.68		SEM	2.40909	1.0109
				n	7	7		n	7	7
				ttest CM vs CM+IFNγ		0.0316132		ttest CM vs CM+IFNγ		0.00014702
[truncated: 3 more columns]

## Sheet: DSA Cohort 2
	Group	Macaque	EHM Dose	Type		Cohort 2			Baseline					EHM					1 weeks					2 weeks					4 weeks					6 weeks					8 weeks					10 weeks					12 weeks
Cohort 2	Tacro + MP	#2506	1x EHM	Allograft				Serum (Dilution)	1:5	1:10	1:20	1:40		1:5	1:10	1:20	1:40		1:5	1:10	1:20	1:40		1:5	1:10	1:20	1:40		1:5	1:10	1:20	1:40		1:5	1:10	1:20	1:40		1:5	1:10	1:20	1:40		1:5	1:10	1:20	1:40		1:5
	Tacro + MP	#2913	1x EHM	Allograft			#2506	anti-Rhesus IgG (mean fluorescence intensity [MFI] displayed as geometric mean)
	Tacro + MP	#2909	1x EHM	Allograft				CM	0	0	0	9.4		0	0	9.4	0		0	0	6.4	17.4		0	0	0	15.4		0	14.4	26.4	24.4		0	2.4	8.4	12.4		0	7.4	24.4	19.4		0	12.4	24.4	11.4		0
	Tacro + MP*	#2887	1x EHM	Allograft				CM + IFNγ	0	8.4	41.2	21.2		1.7	19.2	27.2	26.2		0	6.2	23.2	29.2		0.4	8.6	51.2	36.2		3.2	59.2	67.2	49.2		1.5	60.2	43.2	26.2		4.9	23.2	40.2	27.2		14.5	32.2	30.2	32.2		12.8
	Tacro + MP*	#2869	1x EHM	Allograft
	no ISP	#2500	1x EHM	Autograft				anti-Rhesus IgG (number of positive cardiomyocytes in % [% CM] displayed as geometric mean)
	Cyclosporin + MP	#2915	1x EHM	Allograft				CM	0	0.51	0.47	0.27		0	0.03	0.43	0.39		0	0.14	0.49	0.45		0	0.22	0.29	0.87		0	0.34	0	0		0.03	0.47	0.78	0.49		0	0.29	0.33	0.46		0	0.52	0.46	0.19		0.03
	*ISP withdrawal after 12 weeks							CM + IFNγ	0.34	0.9	1.86	0.9		0.34	0.9	1.86	0.9		0.34	0.89	1.37	1.78		0.28	0.77	2.25	1.5		0.21	2.9	3.15	2.55		0.52	3.18	2.56	1.47		0.39	1.32	1.83	1.72		0.38	2.1	1.52	1.42		0.49
								MHC class I inducibility			CM	CM + IFNγ
								MFI			2277	6756
								% CM			96.29	98.88
									Baseline					EHM					1 weeks					2 weeks					4 weeks					6 weeks					8 weeks					10 weeks					12 weeks
								Serum (Dilution)	1:5	1:10	1:20	1:40		1:5	1:10	1:20	1:40		1:5	1:10	1:20	1:40		1:5	1:10	1:20	1:40		1:5	1:10	1:20	1:40		1:5	1:10	1:20	1:40		1:5	1:10	1:20	1:40		1:5	1:10	1:20	1:40		1:5
							#2913	anti-Rhesus IgG (mean fluorescence intensity [MFI] displayed as geometric mean)
								CM	0	19.2	24.2	15.2		0	21.2	5.2	6.2		0	0	19.2	2.2		0	3.2	38.2	28.2		0	0	13.2	26.2		3.2	0	11.2	1.2		0	0	13.2	12.2		0	0.2	26.2	6.2		0
								CM + IFNγ	0	9.2	29.2	0		0	12.2	0	0		0	0	9.2	6.2		0	0	30.2	29.2		0	0	15.2	21.2		0	2.2	0	4.2		0	33.2	21.2	33.2		0	0	17.2	24.2		0
								anti-Rhesus IgG (number of positive cardiomyocytes in % [% CM] displayed as geometric mean)
								CM	0	0.1	0.24	0		0	0.34	0	0		0	0	0	0		0	0	0.87	0.75		0	0	0	0.34		0	0	0	0		0	0	0	0		0	0	0	0		0
								CM + IFNγ	0	0	0	0		0	0.02	0	0		0	0	0	0		0	0	0.3	0		0	0	0	0		0	0	0	0		0	0.08	0	0		0	0	0	0		0
								MHC class I inducibility			CM	CM + IFNγ
								MFI			825	9197
								% CM			82.07	99.19
									Baseline					EHM					1 weeks					2 weeks					4 weeks					6 weeks					8 weeks					10 weeks					12 weeks
								Serum (Dilution)	1:5	1:10	1:20	1:40		1:5	1:10	1:20	1:40		1:5	1:10	1:20	1:40		1:5	1:10	1:20	1:40		1:5	1:10	1:20	1:40		1:5	1:10	1:20	1:40		1:5	1:10	1:20	1:40		1:5	1:10	1:20	1:40		1:5
							#2909	anti-Rhesus IgG (mean fluorescence intensity [MFI] displayed as geometric mean)
								CM	0	10.4	5.8	12.3		2.9	4.1	0	0		0	9.9	6.3	4.9		10.3	28.2	12.6	11.8		4.9	22.2	9.9	12.3		19	12.6	16.7	5.9		57.2	94.2	30.2	13.8		116.2	97.2	49.2	36.2		109.2
								CM + IFNγ	0	5.9	6	8.4		21.2	14.2	3.6	4.3		4.8	0	2.6	9.3		0	8	4.9	15.2		39.2	33.2	17.2	11.5		16.2	24.2	18.2	14.2		686.2	900.2	143.2	101.2		800.2	516.2	271.2	230.2		675.2
								anti-Rhesus IgG (number of positive cardiomyocytes in % [% CM] displayed as geometric mean)
								CM	0	0.1	0	2.1		0	0	0	0		0	0.15	0	0		1.01	2.2	0.86	0.53		0	0.51	0	0.2		0.4	0	0.8	0		8	14.4	3.8	1.4		17.6	14	8.2	5.5		16.2
								CM + IFNγ	0	0.1	0.04	0.3		2.7	0.38	0	0		0	0	0	0.6		0	0.2	0.12	0.9		2.4	3	0.72	0.25		0.9	2.1	1.3	1.6		53.1	56	29.6	23.7		55.8	49.5	40.8	35		53.1
								MHC class I inducibility			CM	CM + IFNγ
								MFI			579	2962.4
								% CM			44.87	75.59
									Baseline					EHM					1 weeks					2 weeks					4 weeks					6 weeks					8 weeks					10 weeks					12 weeks
								Serum (Dilution)	1:5	1:10	1:20	1:40		1:5	1:10	1:20	1:40		1:5	1:10	1:20	1:40		1:5	1:10	1:20	1:40		1:5	1:10	1:20	1:40		1:5	1:10	1:20	1:40		1:5	1:10	1:20	1:40		1:5	1:10	1:20	1:40		1:5
							#2887	anti-Rhesus IgG (mean fluorescence intensity [MFI] displayed as geometric mean)
								CM	10	44	28	20		10	24	22	17		33	29	26	36		20	48	26	40		21	58	64	48		21	28	47	39		16	43	56	71		21	49	58	87		19
								CM + IFNγ	5	22	20	34		13	18	9	40		18	24	34	13		21	19	6	47		26	27	34	47		30	32	18	29		24	36	28	44		132	254	94	98		102
								anti-Rhesus IgG (number of positive cardiomyocytes in % [% CM] displayed as geometric mean)
								CM	0	1.62	0.05	0.24		0	0	0	0		0	0	0	0		0	0	0	0		0	0	0.37	0		0	0	0	0.2		0	0.11	1	0.04		0	1.72	0.14	2		0
								CM + IFNγ	43.1	0	0	0		43	0	0	0		44.2	0	0	0		46.4	0	0	0		47.9	0	0	1.18		47.3	0	0	0		45	0	0	0.94		47.9	59.2	10.5	8.6		45.2
								MHC class I inducibility			CM	CM + IFNγ
								MFI			716	4183
								% CM			76.7	97.34
									Baseline					EHM					1 weeks					2 weeks					4 weeks					6 weeks					8 weeks					10 weeks					12 weeks
								Serum (Dilution)	1:5	1:10	1:20	1:40		1:5	1:10	1:20	1:40		1:5	1:10	1:20	1:40		1:5	1:10	1:20	1:40		1:5	1:10	1:20	1:40		1:5	1:10	1:20	1:40		1:5	1:10	1:20	1:40		1:5	1:10	1:20	1:40		1:5
							#2869	anti-Rhesus IgG (mean fluorescence intensity [MFI] displayed as geometric mean)
								CM	70.7	110.7	117.7	110.7		15.7	41.7	89.7	80.7		48.7	120.7	146.7	67.7		0	0	130.7	103.7		57.7	83.7	156.7	160.7		53.7	70.7	83.7	128.7		11.7	37.7	60.7	112.7		17.7	55.7	38.7	67.7		0
								CM + IFNγ	94.9	223.9	213.9	140.9		99.9	84.9	171.9	172.9		125.9	185.9	226.9	178.9		139.9	115.9	211.9	196.9		111.9	148.9	136.9	201.9		59.9	85.9	148.9	220.9		47.9	87.9	110.9	236.9		46.9	84.9	151.9	104.9		55.9
								anti-Rhesus IgG (number of positive cardiomyocytes in % [% CM] displayed as geometric mean)
								CM	5.3	10.2	10.3	10.7		1.74	6.5	9.3	9.2		5.22	9.5	10.8	7.25		0	0	11.2	10.5		6.2	9.4	14.9	14.7		3.8	6	7.9	13.1		1.73	6.2	7.2	11.7		2.5	5.2	7.5	10.5		0
								CM + IFNγ	16.9	28	25.1	24.8		18.2	15.9	25.7	25.5		19.2	24.4	27.7	25.5		21.6	20.6	28.8	26.9		19.1	22.8	23.7	27.5		11.3	17.4	24.8	29		8	16.4	19.6	28.7		5.4	17.2	22.6	22.9		6.6
								MHC class I inducibility			CM	CM + IFNγ
								MFI			1519	7672
								% CM			82.5	94.06
									Baseline					EHM					1 weeks					2 weeks					4 weeks					6 weeks					8 weeks					10 weeks					12 weeks
								Serum (Dilution)	1:5	1:10	1:20	1:40		1:5	1:10	1:20	1:40		1:5	1:10	1:20	1:40		1:5	1:10	1:20	1:40		1:5	1:10	1:20	1:40		1:5	1:10	1:20	1:40		1:5	1:10	1:20	1:40		1:5	1:10	1:20	1:40		1:5
							#2500	anti-Rhesus IgG (mean fluorescence intensity [MFI] displayed as geometric mean)
								CM	56.7	15.7	14.3	12.7		32.2	22.3	14.1	27.2		0	10.7	24.5	23.8		0	15.7	65.7	65.7		8.2	26.7	59.7	50.7		6.2	25.9	42.7	38.4		30.3	25.7	41.1	33.3		5.7	31.1	43.7	23.3		6.4
								CM + IFNγ	15	17.4	21.1	27.9		45.6	27.5	29.8	33.6		0	3.7	21	25.6		15.3	16.1	63.6	62.6		18.4	31.6	58.6	67.6		39.6	38.6	47.6	31		17.4	53.6	38.6	34.6		8.6	38.6	40.6	37.6		8.3
								anti-Rhesus IgG (number of positive cardiomyocytes in % [% CM] displayed as geometric mean)
								CM	1.59	0.93	0.69	0.8		1.92	1.12	0.72	0.82		0	0.46	1.03	1.26		0	0.49	2.35	1.98		0.15	1.26	2.71	1.93		0.75	1.14	2.16	1.38		0	1.11	1.7	1.26		0.27	1.67	1.76	1.11		0
								CM + IFNγ	0.59	1.02	0.78	1.31		2.28	1.17	1.56	1.37		0	0.31	0.91	0.95		0.67	0.75	2.68	2.47		1.26	2.12	2.78	1.96		3.15	2.65	2	1.25		1.6	4.04	2.3	2.02		0.06	2.47	2.27	1.93		0.17
								MHC class I inducibility			CM	CM + IFNγ
								MFI			615.8	5230
								% CM			86.9	97
									Baseline					EHM					1 weeks					2 weeks					4 weeks					6 weeks					8 weeks					10 weeks					12 weeks
								Serum (Dilution)	1:5	1:10	1:20	1:40		1:5	1:10	1:20	1:40		1:5	1:10	1:20	1:40		1:5	1:10	1:20	1:40		1:5	1:10	1:20	1:40		1:5	1:10	1:20	1:40		1:5	1:10	1:20	1:40		1:5	1:10	1:20	1:40		1:5
							#2915	anti-Rhesus IgG (mean fluorescence intensity [MFI] displayed as geometric mean)
								CM	19.5	11.5	4.5	0		15.5	2.5	7.5	0		74.8	73.8	77.8	68.8		103.8	101.8	80.8	70.8		81.8	83.8	82.8	78.8		104.8	80.8	77.8	76.8		60.3	53.3	63.8	79.8		48.3	84.8	69.8	86.8		79.8
								CM + IFNγ	35.5	48.5	0	11.5		21.5	13.5	16.5	4.5		117.9	53.6	65.9	83.9		110.9	84.9	82.9	86.9		82.9	100.9	74.9	79.9		112.9	98.9	91.9	70.9		89.9	76.9	90.9	90.9		84.9	89.9	95.9	97.9		137.9
								anti-Rhesus IgG (number of positive cardiomyocytes in % [% CM] displayed as geometric mean)
								CM	1.2	0	0	0		0	0	0	0		11.1	10.7	12	10.9		15.9	15.7	12.2	11.5		11.1	12.1	12.1	12.9		16.5	11.4	11.2	11		8.8	6.58	9.5	11.9		6.7	11.6	9	13.4		12.2
								CM + IFNγ	4.5	8.5	0	0		1.8	0.4	1.1	0		19.7	10	11.8	15.7		18.2	13.4	13.4	14.7		14.7	16	12.3	14.2		18.1	15.5	15.3	10.7		15.5	11.4	14.3	15.1		15.7	15.3	17.3	17.1		25.8
								MHC class I inducibility			CM	CM + IFNγ
								MFI			557	3513
								% CM			48.06	63.7
				anti-Rhesus IgG (mean fluorescence intensity [MFI] displayed as geometric mean)
				CM
					Group	Macaque	EHM Dose	Type
				Cohort 2	Tacro + MP	#2506	1x EHM	Allograft	0	0	0	9.4		0	0	9.4	0		0	0	6.4	17.4		0	0	0	15.4		0	14.4	26.4	24.4		0	2.4	8.4	12.4		0	7.4	24.4	19.4		0	12.4	24.4	11.4		0
					Tacro + MP	#2913	1x EHM	Allograft	0	19.2	24.2	15.2		0	21.2	5.2	6.2		0	0	19.2	2.2		0	3.2	38.2	28.2		0	0	13.2	26.2		3.2	0	11.2	1.2		0	0	13.2	12.2		0	0.2	26.2	6.2		0
					Tacro + MP	#2909	1x EHM	Allograft	0	10.4	5.8	12.3		2.9	4.1	0	0		0	9.9	6.3	4.9		10.3	28.2	12.6	11.8		4.9	22.2	9.9	12.3		19	12.6	16.7	5.9		57.2	94.2	30.2	13.8		116.2	97.2	49.2	36.2		109.2
					Tacro + MP*	#2887	1x EHM	Allograft	10	44	28	20		10	24	22	17		33	29	26	36		20	48	26	40		21	58	64	48		21	28	47	39		16	43	56	71		21	49	58	87		19
					Tacro + MP*	#2869	1x EHM	Allograft	70.7	110.7	117.7	110.7		15.7	41.7	89.7	80.7		48.7	120.7	146.7	67.7		0	0	130.7	103.7		57.7	83.7	156.7	160.7		53.7	70.7	83.7	128.7		11.7	37.7	60.7	112.7		17.7	55.7	38.7	67.7		0
					no ISP	#2500	1x EHM	Autograft	56.7	15.7	14.3	12.7		32.2	22.3	14.1	27.2		0	10.7	24.5	23.8		0	15.7	65.7	65.7		8.2	26.7	59.7	50.7		6.2	25.9	42.7	38.4		30.3	25.7	41.1	33.3		5.7	31.1	43.7	23.3		6.4
					Cyclosporin	#2915	1x EHM	Allograft	19.5	11.5	4.5	0		15.5	2.5	7.5	0		74.8	73.8	77.8	68.8		103.8	101.8	80.8	70.8		81.8	83.8	82.8	78.8		104.8	80.8	77.8	76.8		60.3	53.3	63.8	79.8		48.3	84.8	69.8	86.8		79.8
					*ISP withdrawal after 12 weeks
				anti-Rhesus IgG (mean fluorescence intensity [MFI] displayed as geometric mean)
				CM + IFNγ
					Group	Macaque	EHM Dose	Type
				Cohort 2	Tacro + MP	#2506	1x EHM	Allograft	0	8.4	41.2	21.2		1.7	19.2	27.2	26.2		0	6.2	23.2	29.2		0.4	8.6	51.2	36.2		3.2	59.2	67.2	49.2		1.5	60.2	43.2	26.2		4.9	23.2	40.2	27.2		14.5	32.2	30.2	32.2		12.8
					Tacro + MP	#2913	1x EHM	Allograft	0	9.2	29.2	0		0	12.2	0	0		0	0	9.2	6.2		0	0	30.2	29.2		0	0	15.2	21.2		0	2.2	0	4.2		0	33.2	21.2	33.2		0	0	17.2	24.2		0
					Tacro + MP	#2909	1x EHM	Allograft	0	5.9	6	8.4		21.2	14.2	3.6	4.3		4.8	0	2.6	9.3		0	8	4.9	15.2		39.2	33.2	17.2	11.5		16.2	24.2	18.2	14.2		686.2	900.2	143.2	101.2		800.2	516.2	271.2	230.2		675.2
					Tacro + MP*	#2887	1x EHM	Allograft	5	22	20	34		13	18	9	40		18	24	34	13		21	19	6	47		26	27	34	47		30	32	18	29		24	36	28	44		132	254	94	98		102
					Tacro + MP*	#2869	1x EHM	Allograft	94.9	223.9	213.9	140.9		99.9	84.9	171.9	172.9		125.9	185.9	226.9	178.9		139.9	115.9	211.9	196.9		111.9	148.9	136.9	201.9		59.9	85.9	148.9	220.9		47.9	87.9	110.9	236.9		46.9	84.9	151.9	104.9		55.9
					no ISP	#2500	1x EHM	Autograft	15	17.4	21.1	27.9		45.6	27.5	29.8	33.6		0	3.7	21	25.6		15.3	16.1	63.6	62.6		18.4	31.6	58.6	67.6		39.6	38.6	47.6	31		17.4	53.6	38.6	34.6		8.6	38.6	40.6	37.6		8.3
					Cyclosporin	#2915	1x EHM	Allograft	35.5	48.5	0	11.5		21.5	13.5	16.5	4.5		117.9	53.6	65.9	83.9		110.9	84.9	82.9	86.9		82.9	100.9	74.9	79.9		112.9	98.9	91.9	70.9		89.9	76.9	90.9	90.9		84.9	89.9	95.9	97.9		137.9
					*ISP withdrawal after 12 weeks
				anti-Rhesus IgG (number of positive cardiomyocytes in % [% CM] displayed as geometric mean)
				CM
					Group	Macaque	EHM Dose	Type
				Cohort 2	Tacro + MP	#2506	1x EHM	Allograft	0	0.51	0.47	0.27		0	0.03	0.43	0.39		0	0.14	0.49	0.45		0	0.22	0.29	0.87		0	0.34	0	0		0.03	0.47	0.78	0.49		0	0.29	0.33	0.46		0	0.52	0.46	0.19		0.03
					Tacro + MP	#2913	1x EHM	Allograft	0	0.1	0.24	0		0	0.34	0	0		0	0	0	0		0	0	0.87	0.75		0	0	0	0.34		0	0	0	0		0	0	0	0		0	0	0	0		0
					Tacro + MP	#2909	1x EHM	Allograft	0	0.1	0	2.1		0	0	0	0		0	0.15	0	0		1.01	2.2	0.86	0.53		0	0.51	0	0.2		0.4	0	0.8	0		8	14.4	3.8	1.4		17.6	14	8.2	5.5		16.2
					Tacro + MP*	#2887	1x EHM	Allograft	0	1.62	0.05	0.24		0	0	0	0		0	0	0	0		0	0	0	0		0	0	0.37	0		0	0	0	0.2		0	0.11	1	0.04		0	1.72	0.14	2		0
					Tacro + MP*	#2869	1x EHM	Allograft	5.3	10.2	10.3	10.7		1.74	6.5	9.3	9.2		5.22	9.5	10.8	7.25		0	0	11.2	10.5		6.2	9.4	14.9	14.7		3.8	6	7.9	13.1		1.73	6.2	7.2	11.7		2.5	5.2	7.5	10.5		0
					no ISP	#2500	1x EHM	Autograft	1.59	0.93	0.69	0.8		1.92	1.12	0.72	0.82		0	0.46	1.03	1.26		0	0.49	2.35	1.98		0.15	1.26	2.71	1.93		0.75	1.14	2.16	1.38		0	1.11	1.7	1.26		0.27	1.67	1.76	1.11		0
					Cyclosporin	#2915	1x EHM	Allograft	1.2	0	0	0		0	0	0	0		11.1	10.7	12	10.9		15.9	15.7	12.2	11.5		11.1	12.1	12.1	12.9		16.5	11.4	11.2	11		8.8	6.58	9.5	11.9		6.7	11.6	9	13.4		12.2
					*ISP withdrawal after 12 weeks
				anti-Rhesus IgG (number of positive cardiomyocytes in % [% CM] displayed as geometric mean)
				CM + IFNγ
					Group	Macaque	EHM Dose	Type
				Cohort 2	Tacro + MP	#2506	1x EHM	Allograft	0.34	0.9	1.86	0.9		0.34	0.9	1.86	0.9		0.34	0.89	1.37	1.78		0.28	0.77	2.25	1.5		0.21	2.9	3.15	2.55		0.52	3.18	2.56	1.47		0.39	1.32	1.83	1.72		0.38	2.1	1.52	1.42		0.49
					Tacro + MP	#2913	1x EHM	Allograft	0	0	0	0		0	0.02	0	0		0	0	0	0		0	0	0.3	0		0	0	0	0		0	0	0	0		0	0.08	0	0		0	0	0	0		0
					Tacro + MP	#2909	1x EHM	Allograft	0	0.1	0.04	0.3		2.7	0.38	0	0		0	0	0	0.6		0	0.2	0.12	0.9		2.4	3	0.72	0.25		0.9	2.1	1.3	1.6		53.1	56	29.6	23.7		55.8	49.5	40.8	35		53.1
					Tacro + MP*	#2887	1x EHM	Allograft	43.1	0	0	0		43	0	0	0		44.2	0	0	0		46.4	0	0	0		47.9	0	0	1.18		47.3	0	0	0		45	0	0	0.94		47.9	59.2	10.5	8.6		45.2
					Tacro + MP*	#2869	1x EHM	Allograft	16.9	28	25.1	24.8		18.2	15.9	25.7	25.5		19.2	24.4	27.7	25.5		21.6	20.6	28.8	26.9		19.1	22.8	23.7	27.5		11.3	17.4	24.8	29		8	16.4	19.6	28.7		5.4	17.2	22.6	22.9		6.6
					no ISP	#2500	1x EHM	Autograft	0.59	1.02	0.78	1.31		2.28	1.17	1.56	1.37		0	0.31	0.91	0.95		0.67	0.75	2.68	2.47		1.26	2.12	2.78	1.96		3.15	2.65	2	1.25		1.6	4.04	2.3	2.02		0.06	2.47	2.27	1.93		0.17
					Cyclosporin	#2915	1x EHM	Allograft	4.5	8.5	0	0		1.8	0.4	1.1	0		19.7	10	11.8	15.7		18.2	13.4	13.4	14.7		14.7	16	12.3	14.2		18.1	15.5	15.3	10.7		15.5	11.4	14.3	15.1		15.7	15.3	17.3	17.1		25.8
					*ISP withdrawal after 12 weeks
				MFI	CM	CM + IFNγ		% total cells	CM	CM + IFNγ
				#2506	2277	6756		#2506	96.29	98.88
				#2913	825	9197		#2913	82.07	99.19
				#2909	579	2962.4		#2909	44.87	75.59
				#2887	716	4183		#2887	76.7	97.34
				#2869	1519	7672		#2869	82.5	94.06
				#2500	615.8	5230		#2500	86.9	97
				#2915	557	3513		#2915	48.06	63.7
				Mean	1012.69	5644.77		Mean	73.9129	89.3943
				SD	649.531	2309.8		SD	19.7032	14.0205
				SEM	245.5	873.024		SEM	7.44713	5.29924
				n	7	7		n	7	7
				ttest CM vs CM+IFNγ		0.0014225		ttest CM vs CM+IFNγ		0.116079
[truncated: 15 more columns]

## Sheet: DSA Cohort 3
	Group	Macaque	ISP	Type		Cohort 3			Baseline					Myocardial Infarction					10 weeks					12 weeks					EHM					1 weeks					2 weeks					4 weeks					6 weeks
Cohort 3	Ctr. w/o ISP	#2651	No ISP	No EHM				Serum (Dilution)	1:5	1:10	1:20	1:40		1:5	1:10	1:20	1:40		1:5	1:10	1:20	1:40		1:5	1:10	1:20	1:40		1:5	1:10	1:20	1:40		1:5	1:10	1:20	1:40		1:5	1:10	1:20	1:40		1:5	1:10	1:20	1:40		1:5
							#2651	anti-Rhesus IgG (mean fluorescence intensity [MFI] displayed as geometric mean)
	Ctr. with ISP	#2750	Tacro + MP	No EHM				CM	20.8	41.8	28.8	22.8		n.d.	n.d.	n.d.	n.d.		n.d.	n.d.	n.d.	n.d.		0	19.8	44.8	10.1		n.d.	n.d.	n.d.	n.d.		n.d.	n.d.	n.d.	n.d.		n.d.	n.d.	n.d.	n.d.		n.d.	n.d.	n.d.	n.d.		n.d.
								CM + IFNγ	0	3.2	22.2	14.2		n.d.	n.d.	n.d.	n.d.		n.d.	n.d.	n.d.	n.d.		0	0	0	0		n.d.	n.d.	n.d.	n.d.		n.d.	n.d.	n.d.	n.d.		n.d.	n.d.	n.d.	n.d.		n.d.	n.d.	n.d.	n.d.		n.d.
	2x EHM	#2907	Tacro + MP	Allograft
		#16356 (CM)	Tacro + MP	Allograft				anti-Rhesus IgG (number of positive cardiomyocytes in % [% CM] displayed as geometric mean)
		#16356 (StC)	Tacro + MP	Allograft				CM	0.51	0.15	1.24	0.15		n.d.	n.d.	n.d.	n.d.		n.d.	n.d.	n.d.	n.d.		0	0.55	0.03	0.5		n.d.	n.d.	n.d.	n.d.		n.d.	n.d.	n.d.	n.d.		n.d.	n.d.	n.d.	n.d.		n.d.	n.d.	n.d.	n.d.		n.d.
		#16721	Tacro + MP	Allograft				CM + IFNγ	0.36	1.19	1.94	2.01		n.d.	n.d.	n.d.	n.d.		n.d.	n.d.	n.d.	n.d.		0.43	0.4	0.9	1.39		n.d.	n.d.	n.d.	n.d.		n.d.	n.d.	n.d.	n.d.		n.d.	n.d.	n.d.	n.d.		n.d.	n.d.	n.d.	n.d.		n.d.
	5x EHM	#2819	Tacro + MP	Allograft				MHC class I inducibility			CM	CM + IFNγ
		#2884	Tacro + MP	Allograft				MFI			439.6	5061.2
		#16441	Tacro + MP	Allograft				% CM			64.1	83.8
									Baseline					Myocardial Infarction					10 weeks					12 weeks					EHM					1 weeks					2 weeks					4 weeks					6 weeks
								Serum (Dilution)	1:5	1:10	1:20	1:40		1:5	1:10	1:20	1:40		1:5	1:10	1:20	1:40		1:5	1:10	1:20	1:40		1:5	1:10	1:20	1:40		1:5	1:10	1:20	1:40		1:5	1:10	1:20	1:40		1:5	1:10	1:20	1:40		1:5
							#2750	anti-Rhesus IgG (mean fluorescence intensity [MFI] displayed as geometric mean)
								CM	6.7	20.8	65.9	59.9		n.d.	n.d.	n.d.	n.d.		n.d.	n.d.	n.d.	n.d.		0	0	79.9	51.9		n.d.	n.d.	n.d.	n.d.		n.d.	n.d.	n.d.	n.d.		n.d.	n.d.	n.d.	n.d.		n.d.	n.d.	n.d.	n.d.		n.d.
								CM + IFNγ	0	36.9	36.9	34.9		n.d.	n.d.	n.d.	n.d.		n.d.	n.d.	n.d.	n.d.		0	18.9	35.9	25.9		n.d.	n.d.	n.d.	n.d.		n.d.	n.d.	n.d.	n.d.		n.d.	n.d.	n.d.	n.d.		n.d.	n.d.	n.d.	n.d.		n.d.
								anti-Rhesus IgG (number of positive cardiomyocytes in % [% CM] displayed as geometric mean)
								CM	0.37	0.94	2.7	3.16		n.d.	n.d.	n.d.	n.d.		n.d.	n.d.	n.d.	n.d.		0	0	3.3	2.76		n.d.	n.d.	n.d.	n.d.		n.d.	n.d.	n.d.	n.d.		n.d.	n.d.	n.d.	n.d.		n.d.	n.d.	n.d.	n.d.		n.d.
								CM + IFNγ	0	1.9	1.7	1.85		n.d.	n.d.	n.d.	n.d.		n.d.	n.d.	n.d.	n.d.		0	0.25	1.9	1.32		n.d.	n.d.	n.d.	n.d.		n.d.	n.d.	n.d.	n.d.		n.d.	n.d.	n.d.	n.d.		n.d.	n.d.	n.d.	n.d.		n.d.
								MHC class I inducibility			CM	CM + IFNγ
								MFI			42	1829
								% CM			41.54	86.5
									Baseline					Myocardial Infarction					10 weeks					12 weeks					EHM					1 weeks					2 weeks					4 weeks					6 weeks
								Serum (Dilution)	1:5	1:10	1:20	1:40		1:5	1:10	1:20	1:40		1:5	1:10	1:20	1:40		1:5	1:10	1:20	1:40		1:5	1:10	1:20	1:40		1:5	1:10	1:20	1:40		1:5	1:10	1:20	1:40		1:5	1:10	1:20	1:40		1:5
							#2907	anti-Rhesus IgG (mean fluorescence intensity [MFI] displayed as geometric mean)
								CM	2.6	1.6	11.8	15.3		0	2.9	19.5	14.8		0	0	12.2	8.1		0.3	16.5	16.6	8.6		0	0	14.8	7.7		0	9.8	6.5	17.2		0	0	15.3	12.9		0	0	13.2	14.1		8.6
								CM + IFNγ	0	19.5	29.5	13.1		0	1.6	21.7	42.3		5.9	8.9	14.5	12.4		0	7.3	21.4	20.8		5	9.3	18.9	19.9		0	0	16.3	13.9		0	13.1	27.1	22.8		1.1	21.8	20	18.9		n.d.
								anti-Rhesus IgG (number of positive cardiomyocytes in % [% CM] displayed as geometric mean)
								CM	0.41	0.29	1.29	1.3		0.05	0.27	1.59	1.59		0	0	1.16	0.87		0.01	1.13	1.33	1.12		0	0	1.3	0.77		0	0.16	0.94	1.74		0	0	1.52	1.18		0	0	1.38	1.55		0.44
								CM + IFNγ	0	1.24	2.24	1.25		0	0.04	1.69	3.44		0	0.35	0.91	1.08		0	0.49	1.68	1.15		0.2	0.57	1.74	1.71		0	0	1.77	1.58		0	0.8	2.05	1.94		0	1.75	1.46	1.34		n.d.
								MHC class I inducibility			CM	CM + IFNγ
								MFI			278	3873
								% CM			44.57	93.54
									Baseline					Myocardial Infarction					10 weeks					12 weeks					EHM					1 weeks					2 weeks					4 weeks					6 weeks
								Serum (Dilution)	1:5	1:10	1:20	1:40		1:5	1:10	1:20	1:40		1:5	1:10	1:20	1:40		1:5	1:10	1:20	1:40		1:5	1:10	1:20	1:40		1:5	1:10	1:20	1:40		1:5	1:10	1:20	1:40		1:5	1:10	1:20	1:40		1:5
							#16356 (CM)	anti-Rhesus IgG (mean fluorescence intensity [MFI] displayed as geometric mean)
								CM	0	36.95	135.95	44.95		0	29.95	153.95	47.95		3.85	110.95	87.95	54.95		18.95	32.95	106.95	62.95		14.85	44.95	84.95	3.55		35.95	117.95	114.95	68.95		4.65	85.95	58.95	47.95		2.35	59.95	121.95	58.95		0
								CM + IFNγ	10.55	27.55	96.55	73.55		1.05	6.25	104.55	58.55		0	66.55	88.55	59.55		3.65	95.55	109.55	67.55		9.55	35.55	65.55	0		6.55	58.55	113.55	49.55		0	132.55	75.55	66.55		0	101.55	46.55	60.55		n.d.
								anti-Rhesus IgG (number of positive cardiomyocytes in % [% CM] displayed as geometric mean)
								CM	0.1	1.92	9.78	4.09		0.1	1.17	11.08	4.71		0.19	8.48	7.98	5.38		1.1	2.03	8.78	6.18		1.27	3.02	7.68	0.16		2.58	8.78	8.78	6.48		0.14	5.2	4.91	5.19		0.18	3.28	8.68	5.28		0
								CM + IFNγ	0.65	2.7	8.92	7.32		0.77	0.57	11.02	6.72		0.41	5.92	9.82	7.12		0.58	9.22	10.42	7.42		0.24	3.4	8.32	0.41		0.74	4.31	10.12	5.72		0.07	11.92	9.12	8.42		0.07	9.62	5.92	6.82		n.d.
								MHC class I inducibility			CM	CM + IFNγ
								MFI			299	1287
								% CM			64.1	83.8
									Baseline					Myocardial Infarction					10 weeks					12 weeks					EHM					1 weeks					2 weeks					4 weeks					6 weeks
								Serum (Dilution)	1:5	1:10	1:20	1:40		1:5	1:10	1:20	1:40		1:5	1:10	1:20	1:40		1:5	1:10	1:20	1:40		1:5	1:10	1:20	1:40		1:5	1:10	1:20	1:40		1:5	1:10	1:20	1:40		1:5	1:10	1:20	1:40		1:5
							#16356 (StC)	anti-Rhesus IgG (mean fluorescence intensity [MFI] displayed as geometric mean)
								StC	17	25	13	0		15	21	28	1		14	13	23	9		0	16	8	8		0	22	8	10		20	14	13	7		22	27	22	26		23	24	27	0		0
								StC + IFNγ	9	2	11	23		7	16	25	32		5	10	39	32		31	21	29	17		11	16	26	8		6	24	19	7		5	34	16	18		5	21	34	14		n.d.
								anti-Rhesus IgG (number of positive stromal cells in % [% StC] displayed as geometric mean)
								StC	0.02	0.5	0.73	0.26		0.1	0.83	1.69	0.78		0.16	0.52	1.55	1.28		0.04	0.91	0.98	1.48		0	0.81	0.98	2.48		0.42	0.5	0.88	1.03		0	1.15	2	2.44		0.2	0.85	1.55	0.47		0
								StC + IFNγ	0.016	0.25	0.71	1.36		0	0.58	1.56	2.2		0.06	0.08	3.61	2.72		1.27	0.82	1.73	1.47		0.02	0.33	1.69	0.86		0	1.05	0.93	0.67		0	1.62	1.37	2		0	1.02	2.1	2.1		n.d.
								MHC class I inducibility			StC	StC + IFNγ
								MFI			3300	6300
								% StC			87.61	93.25
									Baseline					Myocardial Infarction					10 weeks					12 weeks					EHM					1 weeks					2 weeks					4 weeks					6 weeks
								Serum (Dilution)	1:5	1:10	1:20	1:40		1:5	1:10	1:20	1:40		1:5	1:10	1:20	1:40		1:5	1:10	1:20	1:40		1:5	1:10	1:20	1:40		1:5	1:10	1:20	1:40		1:5	1:10	1:20	1:40		1:5	1:10	1:20	1:40		1:5
							#16721	anti-Rhesus IgG (mean fluorescence intensity [MFI] displayed as geometric mean)
								CM	0	0	16.9	5.5		0	0	8.8	4.6		0	6.4	6.2	12.3		0	0	11.4	3		3.3	14.9	14.2	8.5		0.9	7.1	9.3	6.3		0	0	0	3.5		0	0	1.5	6.5		0.8
								CM + IFNγ	6.62	0	24.62	17.92		3.42	9.42	15.42	26.72		0	5.82	19.32	13.72		0	0.82	8.72	16.72		0	5.22	11.52	0.12		0	9.42	9.72	3.62		0	0	6.62	2.82		0	1.02	12.82	3.12		0
								anti-Rhesus IgG (number of positive cardiomyocytes in % [% CM] displayed as geometric mean)
								CM	0	0.09	0.54	0.17		0.021	0	0.2	0.18		0.01	0.18	0.15	0.35		0.04	0.008	0.37	0.14		0.07	0.3	0.53	0.26		0	0.19	0.35	0.15		0	0	0.045	0.14		0	0	0.1	0.16		0
								CM + IFNγ	0.23	0.03	0.9	0.49		0.08	0.47	0.58	0.73		0.019	0.1	0.45	0.5		0	0.1	0.44	0.43		0.05	0.19	0.7	0.16		0	0.27	0.31	0.17		0.003	0.08	0.28	0.27		0.14	0.13	0.68	0.14		0.12
								MHC class I inducibility			CM	CM + IFNγ
								MFI			690.6	3922.1
								% CM			79.44	97.65
									Baseline					Myocardial Infarction					10 weeks					12 weeks					EHM					1 weeks					2 weeks					4 weeks					6 weeks
								Serum (Dilution)	1:5	1:10	1:20	1:40		1:5	1:10	1:20	1:40		1:5	1:10	1:20	1:40		1:5	1:10	1:20	1:40		1:5	1:10	1:20	1:40		1:5	1:10	1:20	1:40		1:5	1:10	1:20	1:40		1:5	1:10	1:20	1:40		1:5
							#2819	anti-Rhesus IgG (mean fluorescence intensity [MFI] displayed as geometric mean)
								CM	0.46	0.81	1.38	0.56		1.15	0.52	1.11	0.74		0.28	0.32	1.14	0.65		0	0.68	0.73	0.34		0.06	0.41	1.17	0.33		0	0.78	0.61	0.71		0	0.032	0.78	0.32		0.34	0.15	0.11	0.19		0.043
								CM + IFNγ	1.02	0.25	1.86	0.07		0.09	0.38	0.62	0.48		0.06	1.04	0.56	0.47		0.1	0.26	0.69	0.34		0.19	0.46	0.46	0.41		0.016	1.14	1.14	0.2		0.014	0.001	0.83	0.25		0.77	0.76	0.8	0.34		0
								anti-Rhesus IgG (number of positive cardiomyocytes in % displayed as geometric mean)
								CM	4.72	17.92	29.72	14.52		17.52	4.52	16.72	15.92		0	8.92	25.42	8.52		0	8.82	7.72	1.72		0	13.42	22.82	0		0	6.72	12.32	8.92		0	0	11.52	7.42		1.32	0	0	0.32		0
								CM + IFNγ	3.2	0	35.6	0		0	6.3	10.6	8.9		2.4	23.6	12.7	7.2		0	4.2	12.4	3.4		0	5.8	0	1.5		0	20.2	27.1	0		0	0	10.8	0		26.6	19.9	12.1	4.7		0
								MHC class I inducibility			CM	CM + IFNγ
								MFI			501	5105.3
								% CM			66.5	98.38
									Baseline					Myocardial Infarction					10 weeks					12 weeks					EHM					1 weeks					2 weeks					4 weeks					6 weeks
								Serum (Dilution)	1:5	1:10	1:20	1:40		1:5	1:10	1:20	1:40		1:5	1:10	1:20	1:40		1:5	1:10	1:20	1:40		1:5	1:10	1:20	1:40		1:5	1:10	1:20	1:40		1:5	1:10	1:20	1:40		1:5	1:10	1:20	1:40		1:5
							#2884	anti-Rhesus IgG (mean fluorescence intensity [MFI] displayed as geometric mean)
								CM	37.45	41.65	45.45	24.55		45.65	60.75	46.65	10.45		44.15	45.45	37.65	21.75		46.65	57.75	56.75	34.45		16.35	49.75	42.85	31.35		31.35	44.15	32.65	33.35		21.15	71.75	55.75	40.85		68.75	69.75	48.75	39.65		40.55
								CM + IFNγ	17.62	41.62	31.62	15.62		46.62	0	32.62	1.12		14.62	34.62	24.62	13.62		0	18.62	37.62	37.62		0	4.62	19.62	0.82		0	11.62	67.62	9.62		0	0	n.d.	16.62		22.62	25.62	28.62	18.62		0
								anti-Rhesus IgG (number of positive cardiomyocytes in % displayed as geometric mean)
								CM	3.31	4.54	5	2.06		3.56	5.94	4.02	0.38		3.33	4.46	3.4	1.8		3.26	4.72	3.62	2.34		0.51	5.22	4.63	2.27		2.63	5.01	2.89	3.13		1.5	5.75	4.69	3.67		4.64	5.22	4.14	2.97		3.28
								CM + IFNγ	3.18	4.86	4.72	2.15		0	1.62	3.54	1.5		3.44	3.7	2.77	1.32		0.87	2.37	2.94	2.76		1.26	1.99	2.32	0.71		0.77	2.75	2.99	2.02		1.02	1.02	n.d.	2.09		2.44	2.83	2.81	1.87		0.77
								MHC class I inducibility			CM	CM + IFNγ
								MFI			684.7	3716
								% CM			83.79	93.46
									Baseline					Myocardial Infarction					10 weeks					12 weeks					EHM					1 weeks					2 weeks					4 weeks					6 weeks
								Serum (Dilution)	1:5	1:10	1:20	1:40		1:5	1:10	1:20	1:40		1:5	1:10	1:20	1:40		1:5	1:10	1:20	1:40		1:5	1:10	1:20	1:40		1:5	1:10	1:20	1:40		1:5	1:10	1:20	1:40		1:5	1:10	1:20	1:40		1:5
							#16441	anti-Rhesus IgG (mean fluorescence intensity [MFI] displayed as geometric mean)
								CM	73.75	95.75	35.75	36.75		16.05	44.75	50.75	23.75		77.75	75.75	59.75	16.75		63.75	55.75	55.75	37.75		73.75	67.75	62.75	32.75		16.45	65.75	48.75	14.65		23.55	62.75	34.75	25.75		0	42.75	35.75	20.25		34.75
								CM + IFNγ	36.05	49.05	36.05	25.05		0	54.05	31.05	12.85		34.05	10.95	41.05	37.05		13.35	8.65	38.05	23.15		94.05	83.05	55.05	42.05		21.75	29.05	45.05	21.25		80.05	49.05	37.05	35.05		76.05	48.05	51.05	17.85		29.05
								anti-Rhesus IgG (number of positive cardiomyocytes in % displayed as geometric mean)
								CM	3.25	5.1	2.47	3.04		1.1	2.05	3.35	2.27		3.73	4.89	3.76	1.71		3.7	3.46	4.12	3.38		3.99	4.22	4.12	3.07		0.71	3.52	3.51	2.14		1.53	3.69	2.51	2.22		0	2.13	2.89	1.79		1.82
								CM + IFNγ	1.77	3	2.79	2.03		0.05	3.58	2.13	1.28		1.69	0.51	3.02	2.99		0.58	0.59	3.28	1.95		4.93	5.06	3.87	2.74		0.88	2.01	3.35	1.9		4.05	3.54	2.92	2.17		3.65	2.41	3.55	1.82		1.29
								MHC class I inducibility			CM	CM + IFNγ
								MFI			696.9	5503
								% CM			87.16	92.43
				anti-Rhesus IgG (mean fluorescence intensity [MFI] displayed as geometric mean)
				CM/StC
					Group	Macaque	ISP	Type
				Cohort 3	Ctr. w/o ISP	#2651	No ISP	No EHM	20.8	41.8	28.8	22.8		n.d.	n.d.	n.d.	n.d.		n.d.	n.d.	n.d.	n.d.		0	19.8	44.8	10.1		n.d.	n.d.	n.d.	n.d.		n.d.	n.d.	n.d.	n.d.		n.d.	n.d.	n.d.	n.d.		n.d.	n.d.	n.d.	n.d.		n.d.
					Ctr. with ISP	#2750	Tacro + MP	No EHM	6.7	20.8	65.9	59.9		n.d.	n.d.	n.d.	n.d.		n.d.	n.d.	n.d.	n.d.		0	0	79.9	51.9		n.d.	n.d.	n.d.	n.d.		n.d.	n.d.	n.d.	n.d.		n.d.	n.d.	n.d.	n.d.		n.d.	n.d.	n.d.	n.d.		n.d.
					2x EHM	#2907	Tacro + MP	Allograft	2.6	1.6	11.8	15.3		0	2.9	19.5	14.8		0	0	12.2	8.1		0.3	16.5	16.6	8.6		0	0	14.8	7.7		0	9.8	6.5	17.2		0	0	15.3	12.9		0	0	13.2	14.1		8.6
						#16356 (CM)	Tacro + MP	Allograft	0	36.95	135.95	44.95		0	29.95	153.95	47.95		3.85	110.95	87.95	54.95		18.95	32.95	106.95	62.95		14.85	44.95	84.95	3.55		35.95	117.95	114.95	68.95		4.65	85.95	58.95	47.95		2.35	59.95	121.95	58.95		0
						#16356 (StC)	Tacro + MP	Allograft	17	25	13	0		15	21	28	1		14	13	23	9		0	16	8	8		0	22	8	10		20	14	13	7		22	27	22	26		23	24	27	0		0
						#16721	Tacro + MP	Allograft	0	0	16.9	5.5		0	0	8.8	4.6		0	6.4	6.2	12.3		0	0	11.4	3		3.3	14.9	14.2	8.5		0.9	7.1	9.3	6.3		0	0	0	3.5		0	0	1.5	6.5		0.8
					5x EHM	#2819	Tacro + MP	Allograft	0.46	0.81	1.38	0.56		1.15	0.52	1.11	0.74		0.28	0.32	1.14	0.65		0	0.68	0.73	0.34		0.06	0.41	1.17	0.33		0	0.78	0.61	0.71		0	0.032	0.78	0.32		0.34	0.15	0.11	0.19		0.043
						#2884	Tacro + MP	Allograft	37.45	41.65	45.45	24.55		45.65	60.75	46.65	10.45		44.15	45.45	37.65	21.75		46.65	57.75	56.75	34.45		16.35	49.75	42.85	31.35		31.35	44.15	32.65	33.35		21.15	71.75	55.75	40.85		68.75	69.75	48.75	39.65		40.55
						#16441	Tacro + MP	Allograft	73.75	95.75	35.75	36.75		16.05	44.75	50.75	23.75		77.75	75.75	59.75	16.75		63.75	55.75	55.75	37.75		73.75	67.75	62.75	32.75		16.45	65.75	48.75	14.65		23.55	62.75	34.75	25.75		0	42.75	35.75	20.25		34.75
				anti-Rhesus IgG (mean fluorescence intensity [MFI] displayed as geometric mean)
				CM/StC + IFNγ
					Group	Macaque	ISP	Type
				Cohort 3	Ctr. w/o ISP	#2651	No ISP	No EHM	0	3.2	22.2	14.2		n.d.	n.d.	n.d.	n.d.		n.d.	n.d.	n.d.	n.d.		0	0	0	0		n.d.	n.d.	n.d.	n.d.		n.d.	n.d.	n.d.	n.d.		n.d.	n.d.	n.d.	n.d.		n.d.	n.d.	n.d.	n.d.		n.d.
					Ctr. with ISP	#2750	Tacro + MP	No EHM	0	36.9	36.9	34.9		n.d.	n.d.	n.d.	n.d.		n.d.	n.d.	n.d.	n.d.		0	18.9	35.9	25.9		n.d.	n.d.	n.d.	n.d.		n.d.	n.d.	n.d.	n.d.		n.d.	n.d.	n.d.	n.d.		n.d.	n.d.	n.d.	n.d.		n.d.
					2x EHM	#2907	Tacro + MP	Allograft	0	19.5	29.5	13.1		0	1.6	21.7	42.3		5.9	8.9	14.5	12.4		0	7.3	21.4	20.8		5	9.3	18.9	19.9		0	0	16.3	13.9		0	13.1	27.1	22.8		1.1	21.8	20	18.9		n.d.
						#16356 (CM)	Tacro + MP	Allograft	10.55	27.55	96.55	73.55		1.05	6.25	104.55	58.55		0	66.55	88.55	59.55		3.65	95.55	109.55	67.55		9.55	35.55	65.55	0		6.55	58.55	113.55	49.55		0	132.55	75.55	66.55		0	101.55	46.55	60.55		n.d.
						#16356 (StC)	Tacro + MP	Allograft	9	2	11	23		7	16	25	32		5	10	39	32		31	21	29	17		11	16	26	8		6	24	19	7		5	34	16	18		5	21	34	14		n.d.
						#16721	Tacro + MP	Allograft	6.62	0	24.62	17.92		3.42	9.42	15.42	26.72		0	5.82	19.32	13.72		0	0.82	8.72	16.72		0	5.22	11.52	0.12		0	9.42	9.72	3.62		0	0	6.62	2.82		0	1.02	12.82	3.12		0
					5x EHM	#2819	Tacro + MP	Allograft	1.02	0.25	1.86	0.07		0.09	0.38	0.62	0.48		0.06	1.04	0.56	0.47		0.1	0.26	0.69	0.34		0.19	0.46	0.46	0.41		0.016	1.14	1.14	0.2		0.014	0.001	0.83	0.25		0.77	0.76	0.8	0.34		0
						#2884	Tacro + MP	Allograft	17.62	41.62	31.62	15.62		46.62	0	32.62	1.12		14.62	34.62	24.62	13.62		0	18.62	37.62	37.62		0	4.62	19.62	0.82		0	11.62	67.62	9.62		0	0	n.d.	16.62		22.62	25.62	28.62	18.62		0
						#16441	Tacro + MP	Allograft	36.05	49.05	36.05	25.05		0	54.05	31.05	12.85		34.05	10.95	41.05	37.05		13.35	8.65	38.05	23.15		94.05	83.05	55.05	42.05		21.75	29.05	45.05	21.25		80.05	49.05	37.05	35.05		76.05	48.05	51.05	17.85		29.05
				anti-Rhesus IgG (number of positive cardiomyocytes in % [% CM] displayed as geometric mean)
				CM/StC
					Group	Macaque	ISP	Type
				Cohort 3	Ctr. w/o ISP	#2651	No ISP	No EHM	0.51	0.15	1.24	0.15		n.d.	n.d.	n.d.	n.d.		n.d.	n.d.	n.d.	n.d.		0	0.55	0.03	0.5		n.d.	n.d.	n.d.	n.d.		n.d.	n.d.	n.d.	n.d.		n.d.	n.d.	n.d.	n.d.		n.d.	n.d.	n.d.	n.d.		n.d.
					Ctr. with ISP	#2750	Tacro + MP	No EHM	0.37	0.94	2.7	3.16		n.d.	n.d.	n.d.	n.d.		n.d.	n.d.	n.d.	n.d.		0	0	3.3	2.76		n.d.	n.d.	n.d.	n.d.		n.d.	n.d.	n.d.	n.d.		n.d.	n.d.	n.d.	n.d.		n.d.	n.d.	n.d.	n.d.		n.d.
					2x EHM	#2907	Tacro + MP	Allograft	0.41	0.29	1.29	1.3		0.05	0.27	1.59	1.59		0	0	1.16	0.87		0.01	1.13	1.33	1.12		0	0	1.3	0.77		0	0.16	0.94	1.74		0	0	1.52	1.18		0	0	1.38	1.55		0.44
						#16356 (CM)	Tacro + MP	Allograft	0.1	1.92	9.78	4.09		0.1	1.17	11.08	4.71		0.19	8.48	7.98	5.38		1.1	2.03	8.78	6.18		1.27	3.02	7.68	0.16		2.58	8.78	8.78	6.48		0.14	5.2	4.91	5.19		0.18	3.28	8.68	5.28		0
						#16356 (StC)	Tacro + MP	Allograft	0.02	0.5	0.73	0.26		0.1	0.83	1.69	0.78		0.16	0.52	1.55	1.28		0.04	0.91	0.98	1.48		0	0.81	0.98	2.48		0.42	0.5	0.88	1.03		0	1.15	2	2.44		0.2	0.85	1.55	0.47		0
						#16721	Tacro + MP	Allograft	0	0.09	0.54	0.17		0.021	0	0.2	0.18		0.01	0.18	0.15	0.35		0.04	0.008	0.37	0.14		0.07	0.3	0.53	0.26		0	0.19	0.35	0.15		0	0	0.045	0.14		0	0	0.1	0.16		0
					5x EHM	#2819	Tacro + MP	Allograft	4.72	17.92	29.72	14.52		17.52	4.52	16.72	15.92		0	8.92	25.42	8.52		0	8.82	7.72	1.72		0	13.42	22.82	0		0	6.72	12.32	8.92		0	0	11.52	7.42		1.32	0	0	0.32		0
						#2884	Tacro + MP	Allograft	3.31	4.54	5	2.06		3.56	5.94	4.02	0.38		3.33	4.46	3.4	1.8		3.26	4.72	3.62	2.34		0.51	5.22	4.63	2.27		2.63	5.01	2.89	3.13		1.5	5.75	4.69	3.67		4.64	5.22	4.14	2.97		3.28
						#16441	Tacro + MP	Allograft	3.25	5.1	2.47	3.04		1.1	2.05	3.35	2.27		3.73	4.89	3.76	1.71		3.7	3.46	4.12	3.38		3.99	4.22	4.12	3.07		0.71	3.52	3.51	2.14		1.53	3.69	2.51	2.22		0	2.13	2.89	1.79		1.82
				anti-Rhesus IgG (number of positive cardiomyocytes in % [% CM] displayed as geometric mean)
				CM/StC + IFNγ
					Group	Macaque	ISP	Type
				Cohort 3	Ctr. w/o ISP	#2651	No ISP	No EHM	0.36	1.19	1.94	2.01		n.d.	n.d.	n.d.	n.d.		n.d.	n.d.	n.d.	n.d.		0.43	0.4	0.9	1.39		n.d.	n.d.	n.d.	n.d.		n.d.	n.d.	n.d.	n.d.		n.d.	n.d.	n.d.	n.d.		n.d.	n.d.	n.d.	n.d.		n.d.
					Ctr. with ISP	#2750	Tacro + MP	No EHM	0	1.9	1.7	1.85		n.d.	n.d.	n.d.	n.d.		n.d.	n.d.	n.d.	n.d.		0	0.25	1.9	1.32		n.d.	n.d.	n.d.	n.d.		n.d.	n.d.	n.d.	n.d.		n.d.	n.d.	n.d.	n.d.		n.d.	n.d.	n.d.	n.d.		n.d.
					2x EHM	#2907	Tacro + MP	Allograft	0	1.24	2.24	1.25		0	0.04	1.69	3.44		0	0.35	0.91	1.08		0	0.49	1.68	1.15		0.2	0.57	1.74	1.71		0	0	1.77	1.58		0	0.8	2.05	1.94		0	1.75	1.46	1.34		n.d.
						#16356 (CM)	Tacro + MP	Allograft	0.65	2.7	8.92	7.32		0.77	0.57	11.02	6.72		0.41	5.92	9.82	7.12		0.58	9.22	10.42	7.42		0.24	3.4	8.32	0.41		0.74	4.31	10.12	5.72		0.07	11.92	9.12	8.42		0.07	9.62	5.92	6.82		n.d.
						#16356 (StC)	Tacro + MP	Allograft	0.016	0.25	0.71	1.36		0	0.58	1.56	2.2		0.06	0.08	3.61	2.72		1.27	0.82	1.73	1.47		0.02	0.33	1.69	0.86		0	1.05	0.93	0.67		0	1.62	1.37	2		0	1.02	2.1	2.1		n.d.
						#16721	Tacro + MP	Allograft	0.23	0.03	0.9	0.49		0.08	0.47	0.58	0.73		0.019	0.1	0.45	0.5		0	0.1	0.44	0.43		0.05	0.19	0.7	0.16		0	0.27	0.31	0.17		0.003	0.08	0.28	0.27		0.14	0.13	0.68	0.14		0.12
					5x EHM	#2819	Tacro + MP	Allograft	3.2	0	35.6	0		0	6.3	10.6	8.9		2.4	23.6	12.7	7.2		0	4.2	12.4	3.4		0	5.8	0	1.5		0	20.2	27.1	0		0	0	10.8	0		26.6	19.9	12.1	4.7		0
						#2884	Tacro + MP	Allograft	3.18	4.86	4.72	2.15		0	1.62	3.54	1.5		3.44	3.7	2.77	1.32		0.87	2.37	2.94	2.76		1.26	1.99	2.32	0.71		0.77	2.75	2.99	2.02		1.02	1.02	n.d.	2.09		2.44	2.83	2.81	1.87		0.77
						#16441	Tacro + MP	Allograft	1.77	3	2.79	2.03		0.05	3.58	2.13	1.28		1.69	0.51	3.02	2.99		0.58	0.59	3.28	1.95		4.93	5.06	3.87	2.74		0.88	2.01	3.35	1.9		4.05	3.54	2.92	2.17		3.65	2.41	3.55	1.82		1.29
				MFI	CM / StC	CM + IFNγ		% total cells	CM	CM + IFNγ
				#2651	439.6	5061.2		#2651	64.1	83.8
				#2750	42	1829		#2750	41.54	86.5
				#2907	278	3873		#2907	44.57	93.54
				#16356 (CM)	299	1287		#16356 (CM)	64.1	83.8
				#16356 (StC)	3300	6300		#16356 (StC)	87.61	93.25
				#16721	690.6	3922.1		#16721	79.44	97.65
				#2819	501	5105.3		#2819	66.5	98.38
				#2884	684.7	3716		#2884	83.79	93.46
				#16441	696.9	5503		#16441	87.16	92.43
				Mean	770.2	4066.29		Mean	68.7567	91.4233
				SD	974.374	1659.58		SD	17.351	5.48423
				SEM	324.791	553.195		SEM	5.78368	1.82808
				n	9	9		n	9	9
				ttest CM vs CM+IFNγ		0.00019389		ttest CM vs CM+IFNγ		0.00179695
[truncated: 27 more columns]
