# Supplementary material for: Engineered heart muscle allografts for heart repair in primates and humans
Source: Nature. 2025 Jan 29;639(8054):503–11. doi: 10.1038/s41586-024-08463-0 (PMC11903342; doi:10.1038/s41586-024-08463-0)
Supplement: Supplementary file 6 — Clinical chemistry. [file 41586_2024_8463_MOESM6_ESM.xlsx]

## Sheet: Muscle Biomarkers
CK in U/L (human reference range [♀] 29-168 and [♂] 30-200 U/L)
				Days post EHM implantation
	Group	Macaque	Pre	0	8	15	28	42	56	71	84	112	140	168
Cohort 1	Tacro + MP	#2444	1124	331	376	286	614	660	355	235	394
	Tacrolimus	#2529	920	240	225	1005	267	327	1074	391	477
	Tacro + MP	#2441	985	508	181	632	169	369	581	237	174
	Tacrolimus	#2616	5061	1497	157	149	1118	84	354	4259	395
	Tacro + MP	#2520	3625	396	618	2532	497	335	1140	319	627
	Tacro + MP	#2551	559	500	701	813	612	256	1505	463	914
	no ISP	#2483	618	838	2002	235	687	969	504	304	744
Cohort 2	Tacro + MP	#2506	613	827	313	241	394	411	405	111	357	363	105	274
	Tacro + MP	#2913	1124	773	302	204	569	648	327	493	944	629	311	381
	Tacro + MP	#2909	603	268	729	18643	233	200	828	722	534	343	311	327
	Tacro + MP*	#2887	724	596	1117	527	722	242	736	538	2049	302	243	403	*withdrawal of ISP after 3 months
	Tacro + MP*	#2869	827	2437	258	537	5957	171	265	3172	2997	2037	250	171	*withdrawal of ISP after 3 months
	no ISP	#2500	170	220	320	489	372	226	656	1512	196	199	531	540
	Cyclosporin	#2915	567	553	786	181	525	79	433	389	440	333	1450	353
				pre EHM
			Days pre EHM Implantation										Days post EHM implantation
	Group	Macaque	-181	-160	-153	-146	-139	-130	-118	-105	-21	0	7	14	26	41	55	70	84	112	141	166
Cohort 3	Ctr. w/o ISP	#2651	459	729	388	389	216	307	158	407	388	487	900	407	875	193	1035	182	1279	453	734	281
		#2762	475	83	148	197	634	214	275	522	2256	327	542	642	1856	945	2683	2434	216	2164	563	3408
		#2868	1231	2474	531	1118	n.d.	434	n.d.	99	n.d.	591	859	313	1312	400	549	493	539	274	920	465
	Ctr. +ISP	#2650	371	218	250	293	347	298	193	242	185	185	200	254	142	276	277	237	439	361	173	555
		#2750	347	277	141	156	92	219	161	1275	876	323	760	1460	277	1034	602	875	342	184	253	396
		#16299	484	285	267	429	532	296	172	361	427	342	341	122	675	370	222	500	436	426	956	687
		#2735	767	223	102	3557	1409	955	122	536	322	3444	5918	677	921	606	439	1020	1352	629	667	1964
	2x EHM	#2907	285	166	659	302	218	458	217	315	134	202	286	181	739	276	193	240	398	535	552	2424
		#16356	621	325	338	282	1041	352	183	314	90	803	1170	201	202	247	382	705	376	470	216	378
		#16721	618	180	4015	401	416	452	196	674	235	597	80	129	477	133	353	234	204	649	493	240
	5x EHM	#2819	489	214	317	475	282	418	819	418	259	627	429	196	606	320	763	1662	275	523	602	440
		#2884	509	583	256	190	n.d.	466	n.d.	166	253	187	559	1992	235	555	353	1145	314	1359	937	550
		#16441	349	1192	n.d.	237	n.d.	262	n.d.	465	238	214	897	150	280	115	352	307	270	228	146	442
				pre I/R								pre EHM
CK-MB in U/L (human reference range ≤200 U/L)
				Days post EHM implantation
	Group	Macaque	Pre	0	8	15	28	42	56	71	84	112	140	168
Cohort 1	Tacro + MP	#2444	210	119	97	106	141	163	231	265	149
	Tacrolimus	#2529	328	283	162	171	218	295	346	495	372
	Tacro + MP	#2441	219	208	184	220	175	250	272	222	195
	Tacrolimus	#2616	267	190	135	137	156	151	231	223	156
	Tacro + MP	#2520	282	321	254	362	356	336	301	308	339
	Tacro + MP	#2551	158	168	168	179	163	161	184	185	165
	no ISP	#2483	179	220	204	150	211	187	190	188	160
Cohort 2	Tacro + MP	#2506	230	173	147	123	140	155	175	175	164	178	166	134
	Tacro + MP	#2913	264	222	144	141	157	218	174	197	183	181	214	251
	Tacro + MP	#2909	341	210	153	727	149	168	195	322	217	240	278	266
	Tacro + MP*	#2887	271	239	175	178	210	267	200	249	251	255	184	236	*withdrawal of ISP after 3 months
	Tacro + MP*	#2869	278	346	246	279	365	300	191	235	292	281	209	193	*withdrawal of ISP after 3 months
	no ISP	#2500	221	178	159	154	160	193	180	211	220	191	174	219
	Cyclosporin	#2915	284	240	166	140	173	186	202	219	186	199	231	232
				pre EHM
			Days pre EHM Implantation										Days post EHM implantation
	Group	Macaque	-181	-160	-153	-146	-139	-130	-118	-105	-21	0	7	14	26	41	55	70	84	112	141	166
Cohort 3	Ctr. w/o ISP	#2651	121	172	124	133	96	134	148	171	117	164	145	146	124	179	151	126	149	101	129	111
		#2762	159	127	119	132	135	124	123	155	179	192	129	148	208	183	194	96	114	168	112	152
		#2868	167	256	140	168	n.d.	193	n.d.	198	n.d.	183	221	207	219	210	176	170	193	186	170	172
	Ctr. +ISP	#2650	103	102	140	172	136	133	156	144	112	200	221	150	121	167	244	242	205	232	230	239
		#2750	132	162	161	121	163	124	170	204	215	193	200	206	135	271	216	254	280	279	175	212
		#16299	279	149	154	254	188	122	146	158	166	163	131	126	141	122	118	152	189	263	120	248
		#2735	159	103	84	264	162	149	112	175	170	280	269	108	145	140	175	129	188	142	188	217
	2x EHM	#2907	184	144	179	158	170	141	165	150	104	172	139	119	236	337	290	242	224	231	242	498
		#16356	198	205	157	168	190	163	170	183	219	184	183	160	123	193	183	187	159	214	158	152
		#16721	187	261	245	207	228	192	174	237	200	174	172	140	160	186	142	233	252	239	191	427
	5x EHM	#2819	203	179	135	187	166	150	156	142	141	142	107	147	117	312	332	385	226	159	207	211
		#2884	171	217	183	128	n.d.	197	n.d.	144	146	151	170	193	148	381	287	245	269	480	274	197
		#16441	197	226	n.d.	168	n.d.	264	n.d.	171	215	189	165	137	178	226	371	202	202	166	195	272
				pre I/R								pre EHM
hsTnT in ng/L (human reference range ≤14 ng/L)
				Days post EHM implantation
	Group	Macaque	Pre	0	8	15	28	42	56	71	84	112	140	168
Cohort 1	Tacro + MP	#2444	33.9	13.2	29.6	17.6	15.4	13.4	12.6	28.5	16.2
	Tacrolimus	#2529	34.1	16	63.6	33.5	18.7	17.6	19.7	21.6	21.8
	Tacro + MP	#2441	17.6	8.3	35.1	20.2	15.6	14.6	15.8	16.1	17
	Tacrolimus	#2616	14.2	17.4	15.2	22.5	10.6	11	10.3	13	10
	Tacro + MP	#2520	39.2	15	40	38	21.8	19.6	18.6	15.2	15.8
	Tacro + MP	#2551	20.8	18	168	18.5	14.3	18	13.4	8.4	22.9
	no ISP	#2483	33.6	22.1	74.6	16.4	17.9	37.7	47.6	23.9	50.9
Cohort 2	Tacro + MP	#2506	51.7	10.4	42.6	19.9	<5	14.2	12.4	13.9	10.2	8.9	6.1	13
	Tacro + MP	#2913	7.5	13.4	13.1	<5	<5	5.8	5.4	<5	<5	<5	<5	<5
	Tacro + MP	#2909	25.9	38	60.7	28.4	18.5	16.7	17	17.3	13.9	16.8	13.4	13.2
	Tacro + MP*	#2887	46.5	40.7	20	11.2	23.8	8.9	30.3	9.3	36	7.8	11.3	8.3	*withdrawal of ISP after 3 months
	Tacro + MP*	#2869	39	18	36.6	16.9	15.2	12.7	9	19.5	5.3	10.4	<5	12.7	*withdrawal of ISP after 3 months
	no ISP	#2500	7.5	<5	22.4	8.9	6.8	11	30.8	26.7	<5	<5	<5	<5
	Cyclosporin	#2915	13.9	5.9	6.3	14.2	11.3	12.2	8.8	6.7	5	6.9	11.9	9.1
				pre I/R
			Days pre EHM Implantation										Days post EHM implantation
	Group	Macaque	-181	-160	-153	-146	-139	-130	-118	-105	-21	0	7	14	26	41	55	70	84	112	141	166
Cohort 3	Ctr. w/o ISP	#2651	43.6	12.3	112	30.8	21.4	17.4	34	19.3	50	22.9	36.4	27.5	32.2	35.4	26.9	28.8	22.5	20.7	38	20.9
		#2762	3.39	9.4	41.9	34.1	14.4	15.5	18.6	22.8	18.6	16.7	15.6	15.7	13.4	12.9	13.8	12.3	11.9	11.5	19.6	12.1
		#2868	9.4	10.1	35.1	16.3	n.d.	15.2	n.d.	17	n.d.	17.2	14	15.1	12.6	19.6	17.4	17.9	16.9	29.8	28.4	30.4
	Ctr. +ISP	#2650	7.5	7.8	129.7	18	20.8	45.4	28.6	12	25.7	14.2	17	20.3	14.7	18	16	13.3	18.8	15.1	13	14.2
		#2750	10	7.8	93.8	14.3	14.7	10	48	10.7	142.2	10.2	13.4	16.5	13.5	15.6	13.3	11.8	12.1	12.1	12.6	10.1
		#16299	7.4	7.6	92.9	180.5	13.9	9.6	19.8	11.3	25.4	22.3	22.2	20.3	17.5	18.1	21.4	20.5	15.4	16.9	15.7	17.1
		#2735	3.61	6.8	611.2	120.2	18.9	19.4	14.5	31.4	24.1	28.7	33.5	40.1	35.8	29.9	26.8	22.6	29	16.2	19.6	20.7
	2x EHM	#2907	7.4	10	375.9	33.3	28.2	25.6	34.5	14.2	17.9	17.7	50.3	37.4	10	14.1	9	10.5	11.2	9.7	10.7	9.7
		#16356	23.7	8.7	666.5	11.9	7.6	10	10.8	14.4	16.7	51.2	22.8	20.5	15.6	16	13.9	11.5	11.4	14.4	12.6	13.6
		#16721	3.36	0	27	8.2	7.8	7.8	15.9	11.4	16.3	18.8	21.7	40	23.2	16.9	13	13.6	12	13.9	18.8	24.4
	5x EHM	#2819	13.8	9.3	743.6	20.5	58.1	15	43.1	20.7	21.7	25.8	59	40.4	21.5	19	10.1	13.5	9.7	9.9	23.2	12.3
		#2884	7	15.6	54	9.4	n.d.	7.7	n.d.	8.1	11.2	10	15	35.5	8	10	4.4	4.11	7.3	7.2	7	8.7
		#16441	8.4	5.9	n.d.	40.6	n.d.	14.9	n.d.	11.9	10.1	14.2	20.8	13.2	12.7	14.3	12	13.8	12.1	10.3	9.6	11.6
				pre I/R								pre EHM
NTproBNP in ng/L (human reference range ≤200 ng/L [Roche Assay; cut-off 5 ng/L] and ≤125 ng/L [Abbott Assay; ; cut-off 8.2 ng/L])
				Days post EHM implantation
	Group	Macaque	Pre	0	8	15	28	42	56	71	84	112	140	168
Cohort 1	Tacro + MP	#2444	<5	<5	<5	<5	<5	<5	<5	<5	<5
	Tacrolimus	#2529	<5	<5	7	7.8	<5	<5	<5	<5	<5
	Tacro + MP	#2441	<5	<5	<5	<5	<5	<5	<5	<5	<5
	Tacrolimus	#2616	<5	<5	6.7	<5	<5	<5	<5	<5	<5
	Tacro + MP	#2520	<5	<5	16.6	25.4	12.6	5.7	<5	<5	<5
	Tacro + MP	#2551	<5	<5	11.7	6.4	<5	<5	<5	<5	<5
	no ISP	#2483	<5	<5	8.3	<5	<5	<5	<5	<5	<5
Cohort 2	Tacro + MP	#2506	<5	<5	<5	<5	<5	<5	<5	<5	<5	7.37	8.25	10.89
	Tacro + MP	#2913	<8,2	<8,2	9.1	<8,2	<8,2	<8,2	<8,2	<8,2	<8,2	<8,2	<8,2	<8,2
	Tacro + MP	#2909	<8,2	<8,2	<8,2	<8,2	<8,2	<8,2	<8,2	<8,2	<8,2	<8,2	<8,2	<8,2
	Tacro + MP*	#2887	<8,2	<8,2	<8,2	<8,2	<8,2	<8,2	<8,2	<8,2	<8,2	<8,2	<8,2	<8,2	*withdrawal of ISP after 3 months
	Tacro + MP*	#2869	<8,2	<8,2	<8,2	<8,2	<8,2	<8,2	<8,2	<8,2	9	<8,2	<8,2	<8,2	*withdrawal of ISP after 3 months
	no ISP	#2500	<8,2	<8,2	10.6	14.4	<8,2	<8,2	<8,2	<8,2	<8,2	<8,2	<8,2	<8,2
	Cyclosporin	#2915	<8,2	<8,2	8.7	<8,2	<8,2	<8,2	<8,2	<8,2	<8,2	<8,2	<8,2	<8,2
				pre I/R
			Days pre EHM Implantation										Days post EHM implantation
	Group	Macaque	-181	-160	-153	-146	-139	-130	-118	-105	-21	0	7	14	26	41	55	70	84	112	141	166
Cohort 3	Ctr. w/o ISP	#2651	<8,2	0.9	24.2	26	46.8	16.9	15.9	13.1	11.8	1.8	3.7	6.4	4.6	6.3	4.4	0.9	3.1	<8,2	1.8	11.3
		#2762	1.1	<8,2	25.1	21.5	18	13.3	9.7	7.8	<8,2	<8,2	<8,2	<8,2	8.2	7.5	5.3	2.2	0.1	1.6	<8,2	1.2
		#2868	<8,2	<8,2	30.8	23.2	n.d.	21.2	n.d.	3.2	n.d.	5.4	4.9	1.9	4.2	<8,2	8.4	6.1	5.7	5.2	7	8.2
	Ctr. +ISP	#2650	0.7	<8,2	8.2	15.8	21.4	17.2	10.9	8.7	2	6.9	5.6	8.3	6.1	7.1	5.4	<8,2	<8,2	<8,2	0.7	<8,2
		#2750	1.6	<8,2	15.1	23.3	20.6	14	13.4	12.8	3.2	6	2.9	7.4	3.6	8.4	<8,2	1.6	<8,2	<8,2	4.9	1
		#16299	7.4	<8,2	2.7	4.7	4.5	2.5	6.4	0.6	<8,2	<8,2	<8,2	8.8	8.3	8	10.7	6.2	2.1	1.7	<8,2	4.3
		#2735	<8,2	<8,2	26.7	15.8	18.2	14.9	8.4	10.5	2	8.8	6.4	7.1	6.6	9.6	7.8	6.2	4.5	9	5	10.2
	2x EHM	#2907	<8,2	2.9	33.3	32.8	24	27.3	35.3	15.4	11.7	25.1	22.5	24.1	36	39	25.2	17.9	19.3	25.9	30.8	25
		#16356	<8,2	<8,2	11.7	5.3	6.2	8	5.6	5.2	<8,2	9.3	10.3	4	10.6	12.1	2.2	5.5	3.7	6.5	<8,2	4.5
		#16721	2.6	<8,2	6.1	8.6	9.8	7.4	8.4	7.8	4.9	15.8	14.6	16.1	19.3	9.1	10.3	8.9	7.2	4.2	11.1	11.7
	5x EHM	#2819	<8,2	<8,2	24	21.8	37.6	28.8	17.9	14.7	12.4	27.2	43.7	27.5	30.6	38.7	11.5	14.7	15.7	11	12	21
		#2884	<8,2	<8,2	23.3	27.4	n.d.	18.9	n.d.	6.2	1.6	4.5	16	11.8	14.3	2.5	9.6	8.2	6.4	12.7	10.2	6.6
		#16441	<8,2	<8,2	n.d.	8	n.d.	7.9	n.d.	0.9	0.8	14.7	14	12.2	10.1	4	14.5	8.5	11.2	6.6	7.4	6.3
				pre I/R								pre EHM
LDH in U/L (human reference range ≤247 U/L)
				Days post EHM implantation
	Group	Macaque	Pre	0	8	15	28	42	56	71	84	112	140	168
Cohort 1	Tacro + MP	#2444	340	413	508	399	331	250	309	305	272
	Tacrolimus	#2529	363	356	477	870	368	323	415	282	262
	Tacro + MP	#2441	526	409	661	738	498	359	356	343	378
	Tacrolimus	#2616	701	454	573	322	346	266	242	648	312
	Tacro + MP	#2520	876	343	575	689	453	384	438	449	445
	Tacro + MP	#2551	373	383	579	417	364	361	461	280	366
	no ISP	#2483	371	400	797	400	398	486	492	267	447
Cohort 2	Tacro + MP	#2506	484	402	463	459	278	306	351	335	337	310	368	265
	Tacro + MP	#2913	465	400	397	316	333	280	299	300	323	338	300	287
	Tacro + MP	#2909	475	469	435	1809	316	291	357	309	303	332	299	320
	Tacro + MP*	#2887	649	478	442	318	397	367	649	351	609	348	334	436	*withdrawal of ISP after 3 months
	Tacro + MP*	#2869	585	577	491	392	791	286	297	670	697	425	327	317	*withdrawal of ISP after 3 months
	no ISP	#2500	317	281	357	386	300	222	364	368	301	244	267	336
	Cyclosporin	#2915	328	301	342	272	359	323	331	310	410	315	327	325
				pre I/R
			Days pre EHM Implantation										Days post EHM implantation
	Group	Macaque	-181	-160	-153	-146	-139	-130	-118	-105	-21	0	7	14	26	41	55	70	84	112	141	166
Cohort 3	Ctr. w/o ISP	#2651	444	480	616	381	301	480	386	440	263	309	334	336	330	257	442	210	321	264	283	299
		#2762	324	297	447	364	351	303	332	372	533	265	322	309	510	294	507	516	323	528	317	665
		#2868	421	464	666	388	n.d.	274	n.d.	303	n.d.	271	301	236	481	237	307	248	332	263	285	435
	Ctr. +ISP	#2650	380	394	886	361	332	338	297	344	244	258	261	393	310	340	428	308	368	376	242	330
		#2750	377	335	608	398	298	251	371	434	371	306	491	402	418	369	303	317	308	281	268	305
		#16299	358	312	740	429	336	363	324	291	360	320	363	317	429	322	289	282	362	252	302	363
		#2735	491	263	657	928	378	396	194	331	261	546	745	297	358	250	260	270	396	235	190	365
	2x EHM	#2907	321	365	732	351	403	363	272	358	328	254	498	269	366	276	233	202	235	240	250	434
		#16356	356	311	909	323	317	255	260	268	256	530	483	304	298	247	274	239	257	258	228	265
		#16721	407	468	1015	309	323	374	365	364	334	475	358	339	488	318	348	289	348	286	336	297
	5x EHM	#2819	313	348	846	508	350	332	353	390	320	410	482	357	371	296	328	352	286	195	203	230
		#2884	378	318	587	243	n.d.	216	n.d.	305	358	205	336	410	218	202	263	1005	309	309	225	229
		#16441	363	369	n.d.	451	n.d.	281	n.d.	340	379	495	429	354	360	269	312	258	326	291	210	375
				pre I/R								pre EHM

## Sheet: Kidney Liver Biomarkers
Creatinine in mg/dL (human reference range [♀] 0.5-1.0 and [♂] 0.7-1.2 mg/dL)
				Days post EHM implantation
	Group	Macaque	Pre	0	8	15	28	42	56	71	84	112	140	168
Cohort 1	Tacro + MP	#2444	1.08	1.07	0.89	1.04	1.17	1.1	1.15	1.09	1.09
	Tacrolimus	#2529	1.07	0.97	0.88	0.91	1.04	1.08	1.05	1.05	0.98
	Tacro + MP	#2441	1.11	1.16	1.12	1.08	1.09	1.05	1	1.17	1.14
	Tacrolimus	#2616	0.7	0.88	0.81	0.79	0.89	0.82	0.83	0.81	0.81
	Tacro + MP	#2520	1.26	1.11	1.17	1.17	1.19	1.24	1.27	1.27	1.16
	Tacro + MP	#2551	0.7	0.79	0.86	0.77	0.82	0.72	0.77	0.72	0.7
	no ISP	#2483	0.84	0.89	0.78	0.8	0.88	0.89	0.82	0.93	0.84
Cohort 2	Tacro + MP	#2506	0.75	0.94	1.03	0.97	0.88	0.9	1	0.92	0.92	0.87	0.87	0.83
	Tacro + MP	#2913	1.03	1.07	1.12	0.99	1.03	1.04	0.99	1.14	0.97	1.07	1	0.87
	Tacro + MP	#2909	0.86	0.82	0.83	0.74	0.83	0.86	0.82	0.92	0.78	0.89	0.85	0.78
	Tacro + MP*	#2887	0.91	0.89	0.88	0.92	0.92	1.01	1.06	1.08	0.98	0.89	0.9	0.81	*withdrawal of ISP after 3 months
	Tacro + MP*	#2869	0.73	0.88	0.83	0.89	0.93	0.98	0.95	0.96	0.87	0.89	0.87	0.85	*withdrawal of ISP after 3 months
	no ISP	#2500	0.85	0.79	0.98	0.94	0.88	0.86	0.91	0.93	0.75	0.77	0.9	0.91
	Cyclosporin	#2915	1.03	1.18	1.17	1.21	1.22	1.19	1.1	1.31	1.26	1.2	1.29	1.14
				pre EHM
			Days pre EHM Implantation										Days post EHM implantation
	Group	Macaque	-181	-160	-153	-146	-139	-130	-118	-105	-21	0	7	14	26	41	55	70	84	112	141	166
Cohort 3	Ctr. w/o ISP	#2651	1.24	1.29	1.4	1.26	1.28	1.29	1.37	1.3	1.32	1.32	1.28	1.5	1.24	1.37	1.15	1.24	1.34	1.31	1.34	1.34
		#2762	0.85	0.88	0.85	0.91	0.83	0.76	0.76	0.76	0.83	0.82	0.83	0.74	0.71	0.75	0.87	0.97	0.8	0.98	0.93	0.77
		#2868	0.89	0.82	0.83	0.83	n.d.	0.86	n.d.	0.78	n.d.	0.69	0.65	0.63	0.66	0.66	0.76	0.76	0.77	0.77	0.8	0.71
	Ctr. +ISP	#2650	1.08	1.13	1.02	1.06	1.23	1.15	1.09	1.19	1.16	1.1	1.43	1.38	1.23	1.24	1.2	1.2	1.12	1.33	1.12	1.1
		#2750	0.93	0.95	1.02	0.92	1	0.88	0.97	0.88	0.86	1.12	1.1	0.98	1.04	1.14	1.03	1	0.99	1.36	1.06	0.8
		#16299	1.08	0.93	1	1	0.92	0.98	1.03	0.98	0.99	1.04	0.95	1.02	1.01	0.93	0.96	1	0.97	1.01	1.03	0.98
		#2735	0.9	0.86	0.75	0.81	0.95	0.91	0.89	0.99	0.72	0.83	0.9	0.91	0.87	0.88	0.72	0.79	0.79	0.75	0.71	0.76
	2x EHM	#2907	1.5	1.29	1.16	1.23	1.1	1.2	1.42	1.26	1.54	1.54	1.27	1.32	1.3	1.26	1.18	1.56	1.29	1.24	1.58	1.17
		#16356	0.79	0.76	0.82	0.78	0.79	0.89	0.87	0.88	0.94	0.89	0.77	0.81	0.85	0.88	0.88	0.89	0.89	0.91	0.82	0.83
		#16721	0.97	0.83	0.93	0.88	0.94	1.09	1.08	1.02	0.96	0.93	0.95	0.96	1.08	1.03	1.05	1.1	1.03	0.98	0.96	0.86
	5x EHM	#2819	1.4	1.13	1.18	1.2	1.31	1.29	1.23	1.24	1.11	1.35	1.07	1	1.16	0.88	0.85	0.88	1.06	0.67	0.78	0.75
		#2884	0.85	0.83	0.82	1.1	n.d.	1.06	n.d.	0.92	0.97	0.81	0.78	0.98	0.8	0.87	0.59	0.65	0.54	0.61	0.57	0.63
		#16441	0.77	0.83	n.d.	0.81	n.d.	0.82	n.d.	0.89	0.93	0.81	0.75	0.92	0.9	0.95	0.95	0.91	0.83	0.95	0.76	0.86
				pre I/R								pre EHM
Urea in mg/dL (human reference range [♀] 7-19 and [♂] 8-26 mg/dL)
				Days post EHM implantation
	Group	Macaque	Pre	0	8	15	28	42	56	71	84	112	140	168
Cohort 1	Tacro + MP	#2444	15	11	13	11	9	11	12	10	8
	Tacrolimus	#2529	11	14	11	14	11	11	13	13	14
	Tacro + MP	#2441	16	16	15	15	16	18	15	17	17
	Tacrolimus	#2616	12	11	9	11	13	9	10	13	7
	Tacro + MP	#2520	20	18	18	18	16	13	17	18	14
	Tacro + MP	#2551	17	10	21	13	9	9	9	7	11
	no ISP	#2483	13	15	14	11	15	13	14	12	15
Cohort 2	Tacro + MP	#2506	12	13	14	13	12	11	14	11	9	13	12	9
	Tacro + MP	#2913	18	16	12	11	10	12	17	15	15	15	17	12
	Tacro + MP	#2909	11	10	12	13	10	12	11	13	10	12	14	10
	Tacro + MP*	#2887	11	9	12	11	10	11	12	12	10	8	12	9	*withdrawal of ISP after 3 months
	Tacro + MP*	#2869	15	13	14	10	15	13	12	15	12	9	9	11	*withdrawal of ISP after 3 months
	no ISP	#2500	12	15	12	12	10	15	11	11	14	13	14	14
	Cyclosporin	#2915	12	13	15	15	12	13	12	13	12	10	14	15
				pre EHM
			Days pre EHM Implantation										Days post EHM implantation
	Group	Macaque	-181	-160	-153	-146	-139	-130	-118	-105	-21	0	7	14	26	41	55	70	84	112	141	166
Cohort 3	Ctr. w/o ISP	#2651	16	11	12	11	7	8	12	9	20	9	16	11	14	13	13	12	12	9	13	12
		#2762	18	14	21	21	17	17	13	11	14	14	16	15	18	12	12	11	15	15	14	12
		#2868	10	13	16	18	n.d.	12	n.d.	11	n.d.	13	17	13	15	11	15	9	11	15	12	15
	Ctr. +ISP	#2650	16	12	10	11	14	12	13	9	19	11	12	13	11	11	11	13	12	10	15	9
		#2750	7	10	8	9	6	9	9	6	9	8	7	6	9	8	5	7	6	11	8	9
		#16299	12	14	17	14	13	10	12	11	17	15	18	16	15	14	14	12	12	14	18	12
		#2735	11	12	14	11	15	13	11	12	13	12	11	15	12	13	10	11	10	12	13	12
	2x EHM	#2907	11	14	16	12	11	15	14	12	13	14	14	11	16	16	11	15	13	15	15	19
		#16356	11	13	15	13	11	11	13	13	11	20	18	16	14	12	17	15	15	16	12	13
		#16721	16	16	14	13	11	12	12	11	13	18	22	19	18	14	17	21	22	13	17	14
	5x EHM	#2819	9	11	18	10	10	11	11	9	15	15	17	13	15	15	18	25	19	16	15	17
		#2884	12	10	14	8	n.d.	10	n.d.	10	12	10	17	10	13	17	14	13	19	15	17	21
		#16441	11	8	n.d.	12	n.d.	12	n.d.	12	9	10	13	11	12	16	13	16	17	14	13	14
				pre I/R								pre EHM
ALT in U/L (human reference range [♀] ≤34 and [♂] ≤45 U/L)
				Days post EHM implantation
	Group	Macaque	Pre	0	8	15	28	42	56	71	84	112	140	168
Cohort 1	Tacro + MP	#2444	119	91	101	54	38	44	66	56	56
	Tacrolimus	#2529	59	61	42	40	40	26	22	41	63
	Tacro + MP	#2441	102	112	105	113	110	73	85	70	56
	Tacrolimus	#2616	23	17	36	21	11	8	9	17	11
	Tacro + MP	#2520	90	74	67	63	51	38	56	315	321
	Tacro + MP	#2551	84	59	42	34	22	70	152	21	36
	no ISP	#2483	69	96	120	30	65	287	123	70	59
Cohort 2	Tacro + MP	#2506	72	46	25	24	19	17	32	41	22	27	9	20
	Tacro + MP	#2913	16	16	26	14	10	16	10	18	28	25	18	20
	Tacro + MP	#2909	33	18	29	40	21	14	17	16	14	19	14	19
	Tacro + MP*	#2887	21	15	16	12	10	12	15	13	11	14	14	10	*withdrawal of ISP after 3 months
	Tacro + MP*	#2869	60	47	57	30	26	35	34	24	18	16	31	24	*withdrawal of ISP after 3 months
	no ISP	#2500	42	50	27	26	19	28	22	41	45	36	38	70
	Cyclosporin	#2915	10	6	14	15	6	6	6	6	6	7	8	6
				pre I/R
			Days pre EHM Implantation										Days post EHM implantation
	Group	Macaque	-181	-160	-153	-146	-139	-130	-118	-105	-21	0	7	14	26	41	55	70	84	112	141	166
Cohort 3	Ctr. w/o ISP	#2651	47	34	102	27	27	24	20	20	33	33	31	35	25	30	38	26	30	35	48	41
		#2762	8	21	39	18	33	9	12	12	12	<6	<6	8	22	14	13	11	8	15	12	13
		#2868	21	24	62	27	n.d.	26	n.d.	19	n.d.	30	36	29	23	26	23	23	25	21	23	64
	Ctr. +ISP	#2650	63	24	173	32	23	25	20	22	29	38	31	32	23	22	28	22	25	22	18	31
		#2750	27	20	25	15	15	15	19	33	27	35	37	19	17	29	23	22	29	47	27	43
		#16299	27	17	67	47	33	21	37	22	19	27	27	60	17	16	15	17	19	19	15	25
		#2735	6	11	19	22	11	12	8	18	15	29	25	13	11	8	10	9	14	15	38	7
	2x EHM	#2907	20	25	53	28	53	26	14	17	13	17	109	26	45	75	48	29	68	90	94	80
		#16356	104	48	73	33	49	63	55	75	72	59	62	91	31	59	30	25	30	41	112	139
		#16721	37	45	64	34	35	41	38	40	41	39	36	22	26	24	21	29	38	45	40	58
	5x EHM	#2819	38	34	113	44	40	21	36	23	29	33	67	34	20	110	130	147	223	194	141	209
		#2884	39	28	51	41	n.d.	19	n.d.	16	10	10	18	29	8	57	244	375	299	288	491	822
		#16441	76	23	n.d.	34	n.d.	25	n.d.	47	151	39	38	21	22	26	64	34	53	105	50	62
				pre I/R								pre EHM
AST in U/L (human reference range [♀] ≤31 and [♂] ≤35 U/L)
				Days post EHM implantation
	Group	Macaque	Pre	0	8	15	28	42	56	71	84	112	140	168
Cohort 1	Tacro + MP	#2444	52	39	31	34	28	29	34	35	27
	Tacrolimus	#2529	33	24	30	43	22	26	28	30	27
	Tacro + MP	#2441	43	37	36	54	39	32	36	31	26
	Tacrolimus	#2616	47	32	26	22	23	18	17	37	19
	Tacro + MP	#2520	108	35	37	56	30	26	40	195	57
	Tacro + MP	#2551	31	25	30	28	25	49	50	24	28
	no ISP	#2483	34	44	52	31	37	57	45	34	31
Cohort 2	Tacro + MP	#2506	42	27	25	26	22	25	25	28	25	22	23	21
	Tacro + MP	#2913	31	25	20	21	22	22	16	19	20	21	19	15
	Tacro + MP	#2909	35	26	26	171	20	20	23	28	21	24	21	21
	Tacro + MP*	#2887	39	28	25	23	26	25	39	26	38	31	28	29	*withdrawal of ISP after 3 months
	Tacro + MP*	#2869	52	50	31	31	53	28	26	50	45	39	35	29	*withdrawal of ISP after 3 months
	no ISP	#2500	27	20	22	23	21	23	27	32	25	24	24	26
	Cyclosporin	#2915	26	23	25	29	19	18	18	20	22	20	27	22
				pre I/R
			Days pre EHM Implantation										Days post EHM implantation
	Group	Macaque	-181	-160	-153	-146	-139	-130	-118	-105	-21	0	7	14	26	41	55	70	84	112	141	166
Cohort 3	Ctr. w/o ISP	#2651	38	34	29	26	25	32	25	24	26	27	34	28	27	25	34	21	30	23	31	30
		#2762	22	21	20	21	25	19	23	27	35	21	22	20	30	21	28	27	20	27	17	35
		#2868	36	44	31	26		26		24	n.d.	26	31	24	41	22	26	23	29	24	28	28
	Ctr. +ISP	#2650	39	27	35	28	30	29	27	28	34	27	26	28	23	29	31	29	24	32	23	28
		#2750	31	24	27	26	25	24	31	36	35	24	40	30	29	29	25	27	28	31	22	25
		#16299	33	30	30	32	28	29	28	26	30	30	27	27	31	28	21	24	31	25	28	33
		#2735	33	22	26	65	35	36	18	30	22	47	55	21	24	19	26	20	30	20	22	28
	2x EHM	#2907	24	30	36	26	30	29	25	28	22	20	31	18	32	26	25	21	23	27	25	55
		#16356	43	28	30	25	30	29	28	34	26	46	40	31	25	27	25	28	23	32	35	35
		#16721	40	39	60	33	33	37	32	39	32	37	29	30	36	28	25	31	31	37	32	30
	5x EHM	#2819	32	26	27	30	31	25	30	28	25	30	28	22	22	42	49	41	50	37	52	85
		#2884	33	33	25	21		27		24	24	17	25	33	14	34	82	757	113	101	106	141
		#16441	30	37		28		28		33	53	32	31	27	28	26	35	27	32	33	24	33
				pre I/R								pre EHM
GGT in U/L (human reference range [♀] 9-36 and [♂] 12-64 U/L)
				Days post EHM implantation
	Group	Macaque	Pre	0	8	15	28	42	56	71	84	112	140	168
Cohort 1	Tacro + MP	#2444	54	49	57	62	51	42	45	46	44
	Tacrolimus	#2529	83	65	58	56	52	55	49	53	53
	Tacro + MP	#2441	108	118	118	126	114	104	97	100	94
	Tacrolimus	#2616	36	31	41	34	30	36	29	33	30
	Tacro + MP	#2520	45	48	46	44	44	42	46	60	145
	Tacro + MP	#2551	63	62	55	51	54	63	129	75	64
	no ISP	#2483	42	46	38	40	42	57	114	62	48
Cohort 2	Tacro + MP	#2506	58	60	48	48	45	48	50	55	49	55	51	52
	Tacro + MP	#2913	82	81	84	75	73	66	65	79	74	84	73	65
	Tacro + MP	#2909	50	60	56	50	48	44	43	39	41	44	40	40
	Tacro + MP*	#2887	112	104	95	86	89	87	96	81	92	123	129	128	*withdrawal of ISP after 3 months
	Tacro + MP*	#2869	80	74	66	62	62	66	58	62	55	60	77	77	*withdrawal of ISP after 3 months
	no ISP	#2500	45	42	43	46	45	46	46	47	49	47	45	44
	Cyclosporin	#2915	90	71	62	56	55	59	61	62	61	61	59	59
				pre I/R
			Days pre EHM Implantation										Days post EHM implantation
	Group	Macaque	-181	-160	-153	-146	-139	-130	-118	-105	-21	0	7	14	26	41	55	70	84	112	141	166
Cohort 3	Ctr. w/o ISP	#2651	57	62	57	54	54	58	62	63	54	56	55	55	57	53	56	52	53	55	59	54
		#2762	47	44	40	48	47	50	53	55	48	47	48	47	50	48	45	47	42	44	40	39
		#2868	65	72	66	65		77		80	n.d.	74	80	76	78	71	65	69	68	66	67	65
	Ctr. +ISP	#2650	90	97	111	91	92	88	85	79	64	62	60	64	56	59	57	53	61	62	60	60
		#2750	62	55	60	61	62	55	64	57	63	66	60	55	55	54	52	51	49	56	51	63
		#16299	57	45	45	41	41	45	43	40	44	44	41	46	42	42	43	45	41	50	43	51
		#2735	46	42	46	44	41	42	41	46	45	45	44	41	40	38	40	41	41	43	46	37
	2x EHM	#2907	86	82	79	79	72	84	71	66	65	59	52	54	69	80	73	70	89	89	90	87
		#16356	62	47	40	39	43	44	43	42	43	43	41	40	39	41	41	41	39	43	43	46
		#16721	45	47	39	41	40	40	41	37	40	38	36	34	33	38	38	35	34	36	34	39
	5x EHM	#2819	57	54	45	52	52	47	54	53	58	54	52	49	52	73	94	107	129	130	166	216
		#2884	73	68	62	67		66		75	64	56	62	60	53	65	158	235	242	297	380	769
		#16441	54	56		49		49		48	50	48	43	43	40	41	39	42	37	40	41	41
				pre I/R								pre EHM

## Sheet: Other Biomarkers
AP in U/L (human reference range 40-150 U/L)
				Days post EHM implantation
	Group	Macaque	Pre	0	8	15	28	42	56	71	84	112	140	168
Cohort 1	Tacro + MP	#2444	99	102	104	89	95	80	85	81	84
	Tacrolimus	#2529	147	161	149	179	167	174	172	196	193
	Tacro + MP	#2441	131	146	174	165	134	121	104	130	139
	Tacrolimus	#2616	158	156	181	168	133	158	126	149	148
	Tacro + MP	#2520	122	138	142	146	134	122	107	122	155
	Tacro + MP	#2551	180	228	244	241	200	194	230	175	167
	no ISP	#2483	128	118	163	158	126	177	168	129	112
Cohort 2	Tacro + MP	#2506	229	247	215	218	176	151	171	166	172	55	246	176
	Tacro + MP	#2913	820	994	890	920	841	734	708	668	573	643	598	519
	Tacro + MP	#2909	350	400	361	358	294	254	269	261	272	280	280	319
	Tacro + MP*	#2887	605	606	505	498	461	453	496	398	443	575	582	615	*withdrawal of ISP after 3 months
	Tacro + MP*	#2869	430	481	390	382	347	355	296	311	273	310	471	478	*withdrawal of ISP after 3 months
	no ISP	#2500	162	200	239	300	203	189	188	185	180	173	174	167
	Cyclosporin	#2915	707	644	487	437	432	475	497	555	577	584	589	638
				pre EHM
			Days pre EHM Implantation										Days post EHM implantation
	Group	Macaque	-181	-160	-153	-146	-139	-130	-118	-105	-21	0	7	14	26	41	55	70	84	112	141	166
Cohort 3	Ctr. w/o ISP	#2651	183	193	209	160	179	168	173	152	149	163	166	149	147	145	149	139	142	159	151	136
		#2762	65	71	78	77	73	75	86	82	82	90	94	92	90	92	75	76	70	64	66	58
		#2868	375	386	351	357	n.d.	436	n.d.	438	n.d.	484	453	431	383	395	329	377	311	298	300	245
	Ctr. +ISP	#2650	208	192	262	202	215	191	207	191	186	193	198	195	160	153	139	132	203	170	166	174
		#2750	163	143	160	150	154	133	144	143	217	194	188	160	126	111	114	114	110	109	99	96
		#16299	64	54	78	69	62	53	64	56	72	85	77	75	67	54	57	55	49	49	44	49
		#2735	107	107	135	131	117	102	99	88	105	146	137	145	157	120	100	102	96	137	120	99
	2x EHM	#2907	256	261	352	299	298	245	258	236	205	206	204	233	187	191	159	154	179	161	180	177
		#16356	86	93	140	95	97	88	78	76	92	116	113	121	116	90	91	84	77	75	67	59
		#16721	116	128	121	122	126	110	108	103	125	126	102	94	84	91	80	81	74	82	78	94
	5x EHM	#2819	319	324	232	304	302	283	279	260	282	325	257	265	292	212	148	113	116	87	105	129
		#2884	509	547	336	545	n.d.	446	n.d.	441	398	376	219	321	304	166	227	240	211	305	227	298
		#16441	139	140	n.d.	137	n.d.	134	n.d.	95	90	112	121	101	84	89	73	84	66	81	95	94
				pre I/R								pre EHM
CRP in mg/L (human reference range ≤5 mg/L)
				Days post EHM implantation
	Group	Macaque	Pre	0	8	15	28	42	56	71	84	112	140	168
Cohort 1	Tacro + MP	#2444	3.4	50.2	2.8	1.5	0.8	1.1	0.8	1.2	1
	Tacrolimus	#2529	5.6	2.5	2	2.1	0.7	0.6	1	1.1	0.9
	Tacro + MP	#2441	0.6	0.2	6.7	1.9	1.9	0.3	0.3	0.3	0.6
	Tacrolimus	#2616	1.4	1.8	15	2.4	0.8	1	0.7	0.9	1.1
	Tacro + MP	#2520	8.9	1.7	1.5	0.7	1.9	0.3	0.4	0.3	0.4
	Tacro + MP	#2551	1.8	0.8	3.4	0.9	0.5	0.8	0.4	0.4	0.7
	no ISP	#2483	1.6	2.4	2.7	1.8	1.7	2.2	0.8	0.5	1
Cohort 2	Tacro + MP	#2506	1.9	0.7	4.3	0.7	1.6	0.4	0.6	0.5	0.5	0.7	2.2	2.6
	Tacro + MP	#2913	2.9	1.5	2.2	1.2	0.8	0.7	1	0.6	0.6	1.7	0.8	0.5
	Tacro + MP	#2909	0.9	0.9	3.2	2.1	0.5	1.3	0.9	1.1	1.5	1	1.2	1.2
	Tacro + MP*	#2887	9.3	1.9	5.8	4.9	3.2	2	5	1.6	2.5	2.4	3.8	3.6	*withdrawal of ISP after 3 months
	Tacro + MP*	#2869	4.1	0.8	3.4	2.4	1	0.8	1.1	1.2	3.9	1.2	0.6	1	*withdrawal of ISP after 3 months
	no ISP	#2500	1.6	1.2	9.3	7.3	0.8	1.1	1.4	1	1.4	0.4	0.5	3.4
	Cyclosporin	#2915	3.1	1.7	9.5	3	4.2	1.1	1	1.1	0.7	1.6	0.6	1.1
				pre EHM
			Days pre EHM Implantation										Days post EHM implantation
	Group	Macaque	-181	-160	-153	-146	-139	-130	-118	-105	-21	0	7	14	26	41	55	70	84	112	141	166
Cohort 3	Ctr. w/o ISP	#2651	44.9	10.3	2.3	0.4	0.9	30.1	0.6	1	2.1	1.5	1.5	1.8	0.8	3.3	0.9	2.4	1.7	3	1.2	1.4
		#2762	0.7	1.3	1.2	1	1.2	0.9	1.2	0.8	1.1	1.3	1.3	1.7	1.6	1.3	0.8	1.4	1.7	1.2	0.9	1.4
		#2868	20.2	12	7.5	3.1	n.d.	6.1	n.d.	3.8	n.d.	3.3	2.1	2.6	3	3.1	4.4	5.3	3.9	4	3.9	3.6
	Ctr. +ISP	#2650	5.5	1.6	1.1	1.1	1	0.5	1	0.9	2.2	0.3	0.6	0.4	0.4	0.3	0.5	0.6	1.1	0.6	1	1
		#2750	1.6	2.8	2.5	1.5	3.5	1.2	1.8	1.8	2.5	0.9	1.2	0.7	0.7	1.3	1	1.2	1.3	1.7	1.4	1.8
		#16299	22	3.2	2.3	1.1	1.5	0.9	1.1	0.9	1.7	3.9	1.6	1.7	1.4	1.4	1.5	2	1.1	1.1	1.3	1.1
		#2735	4.1	1.7	1.2	2.1	1	0.6	0.5	0.7	0.2	0.8	0.5	0.9	1	0.8	0.5	0.6	0.6	0.8	1.2	0.7
	2x EHM	#2907	0.4	3	8.8	0.9	1.2	0.7	1.2	0.6	0.5	2.7	1.5	0.8	0.3	0.3	0.8	0.7	0.6	1	0.7	0.3
		#16356	5.9	4.9	2.5	0.9	0.6	0.6	0.7	0.5	0.9	1.9	1.5	0.9	0.9	0.8	0.9	1	0.8	1.2	0.6	0.5
		#16721	4.4	3.9	1.3	0.7	0.7	0.5	0.8	1	1	2.5	1.7	1.1	1.2	1.2	1	1.2	4.2	0.6	0.9	0.6
	5x EHM	#2819	5	0.8	4.9	1	1.3	1	1.1	1.4	1	1.5	1.4	1.3	0.4	0.4	0.4	0.3	0.5	0.3	0	0.3
		#2884	3.7	2.4	3.1	2.5	n.d.	1.8	n.d.	1.6	1.4	1.1	8.9	1.1	0.7	0.4	0.9	0.6	0.5	0.3	0.19	0.19
		#16441	3	2.2	n.d.	2.2	n.d.	1.5	n.d.	0.8	0.8	0.7	2	0.8	0.5	0.7	0.6	0.8	0.5	0.7	1	0.8
				pre I/R								pre EHM
Triglycerides mg/dL (human reference range ≤200 mg/dL)
				Days post EHM implantation
	Group	Macaque	Pre	0	8	15	28	42	56	71	84	112	140	168
Cohort 1	Tacro + MP	#2444	188	76	120	88	72	55	102	116	103
	Tacrolimus	#2529	48	108	113	78	108	62	127	82	107
	Tacro + MP	#2441	54	142	125	79	89	49	110	117	139
	Tacrolimus	#2616	52	140	97	69	84	77	50	72	117
	Tacro + MP	#2520	93	88	71	104	56	58	46	46	73
	Tacro + MP	#2551	119	106	66	41	70	53	122	68	104
	no ISP	#2483	134	128	107	106	173	160	229	147	205
Cohort 2	Tacro + MP	#2506	87	233	77	62	65	49	84	104	120	80	141	175
	Tacro + MP	#2913	95	83	133	113	153	131	130	175	221	236	217	280
	Tacro + MP	#2909	25	76	122	86	96	78	102	127	170	134	150	223
	Tacro + MP*	#2887	69	123	82	62	89	85	105	104	83	77	81	113	*withdrawal of ISP after 3 months
	Tacro + MP*	#2869	73	57	60	64	65	67	51	76	79	29	39	42	*withdrawal of ISP after 3 months
	no ISP	#2500	82	221	170	158	135	88	143	180	54	84	120	221
	Cyclosporin	#2915	47	48	72	85	53	74	61	68	76	83	69	54
				pre I/R
			Days pre EHM Implantation										Days post EHM implantation
	Group	Macaque	-181	-160	-153	-146	-139	-130	-118	-105	-21	0	7	14	26	41	55	70	84	112	141	166
Cohort 3	Ctr. w/o ISP	#2651	40	20	81	51	117	92	91	95	113	35	82	48	114	93	109	44	119	92	75	110
		#2762	54	92	103	64	77	88	48	53	84	108	80	83	100	149	193	120	170	139	78	230
		#2868	28	54	28	28	n.d.	28	n.d.	23	n.d.	50	43	35	76	17	26	22	22	68	40	34
	Ctr. +ISP	#2650	121	87	75	127	78	113	110	82	61	91	55	69	73	85	143	80	115	110	75	203
		#2750	50	45	25	40	48	38	60	60	63	48	71	47	48	50	74	60	92	66	73	74
		#16299	17	32	52	51	63	62	67	81	63	98	75	55	125	44	30	144	107	78	33	81
		#2735	43	62	51	136	72	76	33	72	78	122	113	102	110	69	75	69	90	140	181	158
	2x EHM	#2907	54	73	76	94	101	62	62	54	61	58	77	117	130	332	254	295	352	139	398	609
		#16356	44	67	72	72	86	62	67	67	87	63	74	39	22	58	49	60	64	61	57	110
		#16721	31	42	80	61	67	38	53	113	46	75	45	22	27	122	80	53	60	86	59	87
	5x EHM	#2819	40	44	37	72	42	53	57	73	47	43	79	72	86	328	449	286	166	269	265	338
		#2884	112	122	82	81	n.d.	89	n.d.	155	73	92	59	198	133	390	814	2572	1513	1256	464	293
		#16441	33	45	n.d.	54	n.d.	34	n.d.	37	81	47	36	43	60	36	54	61	28	61	67	52
				pre I/R								pre EHM
Glucose mg/dL (human reference range 70-100 mg/dL)
				Days post EHM implantation
	Group	Macaque	Pre	0	8	15	28	42	56	71	84	112	140	168
Cohort 1	Tacro + MP	#2444	60	180	112	126	225	167	183	96	228
	Tacrolimus	#2529	155	226	198	168	180	122	168	100	229
	Tacro + MP	#2441	150	151	106	91	159	80	210	83	163
	Tacrolimus	#2616	90	176	77	83	174	84	160	112	166
	Tacro + MP	#2520	139	176	127	66	126	130	133	107	109
	Tacro + MP	#2551	102	200	94	162	169	120	182	115	204
	no ISP	#2483	90	109	79	89	117	73	85	61	81
Cohort 2	Tacro + MP	#2506	117	219	115	120	191	118	172	149	208	80	51	175
	Tacro + MP	#2913	195	181	119	124	189	117	221	203	248	215	211	360
	Tacro + MP	#2909	195	194	87	104	219	141	192	105	235	173	144	271
	Tacro + MP*	#2887	230	156	94	117	178	132	154	82	100	102	41	82	*withdrawal of ISP after 3 months
	Tacro + MP*	#2869	173	156	90	100	172	113	235	43	187	100	102	175	*withdrawal of ISP after 3 months
	no ISP	#2500	196	252	99	58	188	67	139	66	139	130	193	200
	Cyclosporin	#2915	139	143	96	97	127	107	166	119	105	98	80	116
				pre I/R
			Days pre EHM Implantation										Days post EHM implantation
	Group	Macaque	-181	-160	-153	-146	-139	-130	-118	-105	-21	0	7	14	26	41	55	70	84	112	141	166
Cohort 3	Ctr. w/o ISP	#2651	130	118	68	86	134	70	49	69	135	89	22	92	87	61	86	66	77	99	64	111
		#2762	120	139	93	40	93	82	73	73	71	107	71	65	62	79	138	93	98	65	92	115
		#2868	130	158	77	92		89		110	159	159	109	105	96	134	125	104	91	101	131	104
	Ctr. +ISP	#2650	166	170	102	143	64	106	101	154	142	137	149	130	177	125	186	126	159	104	127	227
		#2750	113	157	85	122	84	129	64	127	73	105	93	207	188	136	185	120	198	108	216	220
		#16299	175	163	113	166	104	136	63	107	83	168	143	49	246	167	224	192	179	134	130	211
		#2735	96	187	135	125	100	125	148	104	92	199	105	168	241	174	229	180	200	215	205	281
	2x EHM	#2907	109	118	77	81	84	84	76	113	117	140	88	174	382	644	447	327	401	405	492	701
		#16356	61	120	105	146	119	128	94	116	162	162	97	131	147	112	166	137	158	82	207	162
		#16721	123	142	177	184	114	149	64	189	121	189	89	226	198	78	189	121	192	68	167	183
	5x EHM	#2819	98	95	98	125	68	142	82	112	128	173	172	98	263	287	595	337	553	355	379	514
		#2884	87	78	89	93		75		130	82	154	93	91	197	223	471	337	476	267	592	747
		#16441	122	112		108		103		161	170	229	152	109	176	100	173	97	153	86	116	167
				pre I/R								pre EHM
Protein in g/dL (human reference range 6.6-8.3 g/dL)
				Days post EHM implantation
	Group	Macaque	Pre	0	8	15	28	42	56	71	84	112	140	168
Cohort 1	Tacro + MP	#2444	6.9	6.9	6.7	6.7	7	6.5	7	6.8	6.5
	Tacrolimus	#2529	6.6	7	6.8	6.9	6.8	6.7	6.3	6.8	6.4
	Tacro + MP	#2441	6.5	7.5	6.6	7.3	7.2	6.7	6.5	6.9	6.8
	Tacrolimus	#2616	6.8	7.2	7.1	7.2	7.3	7.4	6.6	7.3	7
	Tacro + MP	#2520	6.8	6.5	6.7	6.7	6.5	6.6	7	6.7	6.4
	Tacro + MP	#2551	6.6	6.6	6.6	6.6	6.6	6.5	6.6	6.4	6.3
	no ISP	#2483	7	6.8	6.8	6.9	7.2	7.3	7.2	7	7
Cohort 2	Tacro + MP	#2506	7.5	7.2	7	7.2	7	7.2	7	7	6.6	7.2	7.5	7
	Tacro + MP	#2913	6.7	6.9	7.6	7.3	7.2	7.4	6.9	7.7	7.2	7.6	7.6	7
	Tacro + MP	#2909	6.6	7	7.2	7.2	6.9	6.9	6.9	6.9	6.6	6.6	6	6.6
	Tacro + MP*	#2887	7.2	7.4	7.5	7.3	7.2	7.2	7.1	7	7.2	6.9	6.8	7	*withdrawal of ISP after 3 months
	Tacro + MP*	#2869	7.1	7.3	7.2	7	7.1	7.5	7.8	8.4	8.7	7.9	7.1	6.5	*withdrawal of ISP after 3 months
	no ISP	#2500	6.5	6.6	7	7.7	6.9	7	6.7	7	7.2	6.8	6.6	6.4
	Cyclosporin	#2915	6.8	6.9	6.5	6.6	6.3	7	6.3	6.9	6.6	7.1	6.8	6.6
				pre I/R
			Days pre EHM Implantation										Days post EHM implantation
	Group	Macaque	-181	-160	-153	-146	-139	-130	-118	-105	-21	0	7	14	26	41	55	70	84	112	141	166
Cohort 3	Ctr. w/o ISP	#2651	7.3	7.2	7.4	7.2	7.1	7.3	7.7	7.5	7.3	7.4	7.8	7.1	7.5	7.6	7.7	7.2	7.4	7.2	7.6	7.4
		#2762	7.3	6.6	6.9	7.2	7.3	7.3	7.2	6.9	7.3	7.2	7.1	7.2	7.5	7.2	6.8	7.2	6.8	7.3	7.2	7
		#2868	7.1	6.8	6.8	7.1		7.1		6.8	6.9	6.9	7.3	6.9	7.4	7.1	7	7	7	7.2	7	7.4
	Ctr. +ISP	#2650	7.2	6.7	6.9	7	7.1	7.2	7.4	7	7	7.3	7.1	7	6.9	7.1	7.2	7	6.9	7.3	7	7.2
		#2750	7.2	6.9	7.2	6.9	7.3	7.1	7.4	7.3	7.2	7.2	7.6	6.9	7.2	6.7	6.5	6.6	6.6	7.3	6.6	6.7
		#16299	7.1	6.8	7.3	6.9	7.2	7	7.6	7	7.2	7.2	7.3	7.5	7.1	7.1	6.9	6.9	7	6.9	7.1	6.8
		#2735	7.5	6.6	7	7.3	7.2	7.1	6.6	6.8	7	7.1	7	6.6	7.2	7	7.3	7.1	7	6.9	7.2	6.8
	2x EHM	#2907	6.8	7	7.6	7.1	7.2	7	7	7	6.7	6.7	6.6	6.8	7.3	7.2	6.8	6.6	6.9	6.9	7.1	7.4
		#16356	7.2	6.9	6.7	6.8	7.2	7.2	7	6.9	6.8	7.5	6.9	6.6	6.5	6.8	6.5	6.4	6.4	6.9	6.6	6.6
		#16721	6.9	6.9	7.4	7.1	7.1	7.2	7.3	6.8	6.7	7.1	6.7	6.3	6.2	6.8	6.3	6.2	6.2	6.7	6.7	6.2
	5x EHM	#2819	6.5	6.4	6.4	6.6	6.7	6.3	6.8	6.5	6.7	6.5	6.4	6.6	6.5	6.5	6.3	6.7	6.4	6.4	6.6	6.4
		#2884	6.5	6.4	7.3	6.8		6.8		7	6.9	7	7.3	7.4	7	7.1	6.9	9.4	7.6	6.7	6.9	6.5
		#16441	6.6	6.4		6.7		6.8		7	6.7	6.9	6.9	7.1	6.3	6.7	6.4	6.8	6.4	6.4	6.5	6.3
				pre I/R								pre EHM

## Sheet: Electrolytes
Na in mmol/L (human reference range 136-145 mmol/L)
				Days post EHM implantation
	Group	Macaque	Pre	0	8	15	28	42	56	71	84	112	140	168
Cohort 1	Tacro + MP	#2444	148	148	146	144	147	145	147	146	148
	Tacrolimus	#2529	146	147	142	145	147	145	146	145	142
	Tacro + MP	#2441	148	147	146	146	151	147	146	146	148
	Tacrolimus	#2616	147	145	145	147	146	145	145	146	142
	Tacro + MP	#2520	146	148	146	147	147	146	147	147	149
	Tacro + MP	#2551	148	144	143	142	143	143	144	143	145
	no ISP	#2483	148	148	146	146	149	149	151	148	148
Cohort 2	Tacro + MP	#2506	146	147	148	147	146	148	147	147	150	146	146	150
	Tacro + MP	#2913	141	146	147	145	147	145	145	145	147	146	146	145
	Tacro + MP	#2909	148	149	148	150	147	149	147	147	145	147	147	144
	Tacro + MP*	#2887	146	147	147	145	147	147	146	146	145	145	146	144	*withdrawal of ISP after 3 months
	Tacro + MP*	#2869	151	149	148	148	148	151	146	147	144	145	147	149	*withdrawal of ISP after 3 months
	no ISP	#2500	147	147	145	148	144	148	146	146	152	144	147	146
	Cyclosporin	#2915	144	146	146	146	145	146	145	145	147	147	146	149
				pre EHM
			Days pre EHM Implantation										Days post EHM implantation
	Group	Macaque	-181	-160	-153	-146	-139	-130	-118	-105	-21	0	7	14	26	41	55	70	84	112	141	166
Cohort 3	Ctr. w/o ISP	#2651	150	150	147	148	150	150	149	150	149	150	150	149	152	150	152	150	150	150	154	147
		#2762	149	144	147	149	147	148	147	146	146	148	147	149	149	147	144	147	147	147	147	150
		#2868	148	145	146	146	n.d.	148	n.d.	148	n.d.	150	149	145	148	148	148	149	147	146	147	149
	Ctr. +ISP	#2650	148	145	146	149	148	149	147	148	146	149	147	147	148	147	146	148	146	148	150	144
		#2750	149	147	147	150	146	148	146	150	150	148	147	147	147	147	148	145	145	146	145	148
		#16299	146	145	146	145	146	148	148	151	148	147	145	147	146	146	146	146	146	146	149	146
		#2735	150	147	148	150	147	147	148	150	149	149	147	146	146	145	148	146	146	147	146	145
	2x EHM	#2907	144	143	146	147	146	148	148	143	145	146	146	146	144	145	143	143	144	145	138	136
		#16356	150	147	145	147	144	148	145	147	144	145	145	148	146	146	146	144	145	144	146	145
		#16721	148	147	145	150	145	146	147	145	147	145	147	146	144	146	146	144	144	146	146	145
	5x EHM	#2819	145	146	148	148	147	146	147	146	147	146	145	146	143	144	136	147	143	145	143	141
		#2884	147	149	146	149	n.d.	147	n.d.	146	149	147	145	145	148	144	141	140	142	142	135	135
		#16441	147	147	n.d.	147	n.d.	148	n.d.	147	146	147	149	147	145	149	145	148	147	147	147	147
				pre I/R								pre EHM
K in mmol/L (human reference range 3.5-4.6 mmol/L)
				Days post EHM implantation
	Group	Macaque	Pre	0	8	15	28	42	56	71	84	112	140	168
Cohort 1	Tacro + MP	#2444	3.2	4.1	3.5	3.5	4.3	3.5	3.8	3.2	4.1
	Tacrolimus	#2529	3.3	4.1	3.7	5.1	3.7	3.5	3.5	3.1	3.6
	Tacro + MP	#2441	4.3	4.9	3.3	3.6	4.1	3.3	3.8	3.3	4.2
	Tacrolimus	#2616	3.6	4	2.9	3.3	3.9	2.8	3.7	3.3	4
	Tacro + MP	#2520	4.2	4.1	3.8	3.7	3.7	3.3	3.8	3.2	4
	Tacro + MP	#2551	3.5	3.9	3.9	3.2	3.5	3.1	3.8	3	4
	no ISP	#2483	3.5	3.5	3.7	3.1	3.7	3.4	3.7	2.9	4.1
Cohort 2	Tacro + MP	#2506	4.3	4	3	3.3	3.4	2.9	3.5	3.5	3.6	3.1	3.3	3.7
	Tacro + MP	#2913	4.2	3.7	3.9	4	3.8	3.5	3.2	2.7	3.1	2.9	3	3.3
	Tacro + MP	#2909	3.7	3.8	3.2	3.9	3.7	3.2	3.2	2.9	3.1	3.2	3.4	2.9
	Tacro + MP*	#2887	4.3	4.1	4	3.3	4.1	3.3	3.8	3.3	3.9	3.3	3.5	3.5	*withdrawal of ISP after 3 months
	Tacro + MP*	#2869	4.4	3.9	3.2	2.9	3.6	3	3.2	3.4	3.8	3.2	3.3	3.1	*withdrawal of ISP after 3 months
	no ISP	#2500	3.8	3.5	3.5	3.3	3.7	2.9	3.9	4	3.8	3.1	3.4	3.8
	Cyclosporin	#2915	3.6	3.7	3.6	3.5	3.6	3.6	3.7	3.6	3.8	3.4	3.5	3.4
				pre EHM
			Days pre EHM Implantation										Days post EHM implantation
	Group	Macaque	-181	-160	-153	-146	-139	-130	-118	-105	-21	0	7	14	26	41	55	70	84	112	141	166
Cohort 3	Ctr. w/o ISP	#2651	3.8	3.3	3.5	3.7	3.6	3.2	3.2	3.3	3.4	3.1	3.5	3	4	3.5	4.1	3.3	3.9	3.8	4	3.6
		#2762	3.7	3.6	4	3.7	3.4	4	3.7	3.9	4.8	4.3	3.6	3.7	3.8	3.6	3.8	3.4	3.4	3.8	3.5	4
		#2868	3.6	3.8	3.2	3.3	n.d.	3	n.d.	3.2	n.d.	3.5	3.5	3.3	3.7	3.2	3.1	3.1	3.4	3.3	3.4	3.6
	Ctr. +ISP	#2650	3.4	3.5	3.2	3.5	3.5	3.3	3.2	3.5	3.4	3.1	3.3	3.6	3.4	3.2	3.6	3.4	3.6	3.4	3.2	3.3
		#2750	3.3	3.8	3.3	3.9	3.4	3.5	3.2	3.8	3.5	3.6	3.8	3.7	4	3.8	3.9	3.4	3.5	3.1	3.4	3.1
		#16299	3.4	3.8	3.6	3.7	3.6	3.7	3	3.8	3.5	3.7	3.5	3.2	4.1	3.2	3.5	2.16	3.8	3.1	3.1	3.4
		#2735	4.2	4.3	3.8	4.5	4.1	4.4	4	4	4.2	4.5	4.3	3.5	3.7	3	3.3	3.2	3.2	3	2.9	3.3
	2x EHM	#2907	3.9	3.7	3.6	4.3	3.5	4.1	3.4	3.9	3.9	3.8	3.9	4.1	3.6	3.7	3.5	3.1	3	3	2.7	3.3
		#16356	3.6	4.1	3.5	3.8	3.2	3.7	3.1	3.8	3.7	4	3.5	3.6	3.6	3	3.5	3.1	3.4	3	3.3	3.5
		#16721	3.5	3.2	3.8	3.5	3.2	3.2	3.6	3.6	3.5	3.7	2.9	3.1	3.4	2.9	3.2	2.9	2.7	3	3.4	3.5
	5x EHM	#2819	3.8	3.7	3.5	4	3.7	3.9	3.5	4	3.8	3.9	4.1	3.1	3.3	2.7	3.7	3.3	3.7	3	2.9	3.2
		#2884	3.7	3.6	3.7	3.5	n.d.	3.6	n.d.	4	4	4	4.1	3.7	3.1	3.1	3.5	3.3	3.4	3.5	3.9	4
		#16441	3.6	3.7	n.d.	3.5	n.d.	3.6	n.d.	3.7	4	4.1	3.3	3.3	3.1	3.1	3.4	3.4	3.5	3.2	3.1	3.5
				pre I/R								pre EHM
Ca in mmol/L (human reference range 2.2-2.55 mmol/L)
				Days post EHM implantation
	Group	Macaque	Pre	0	8	15	28	42	56	71	84	112	140	168
Cohort 1	Tacro + MP	#2444	2.42	2.28	2.21	2.18	2.26	2.17	2.28	2.14	2.23
	Tacrolimus	#2529	2.28	2.27	2.25	2.45	2.28	2.25	2.17	2.2	2.18
	Tacro + MP	#2441	2.14	2.25	2.04	2.2	2.16	2.05	2.06	2.1	2.17
	Tacrolimus	#2616	2.27	2.24	2.3	2.25	2.26	2.28	2.15	2.39	2.27
	Tacro + MP	#2520	2.31	2.29	2.3	2.28	2.32	2.22	2.36	2.29	2.26
	Tacro + MP	#2551	2.21	2.16	2.17	2.2	2.23	2.13	2.21	2.09	2.31
	no ISP	#2483	2.4	2.19	2.29	2.16	2.33	2.33	2.4	2.23	2.29
Cohort 2	Tacro + MP	#2506	2.35	2.32	2.29	2.3	2.33	2.3	2.26	2.33	2.24	2.28	2.26	2.4
	Tacro + MP	#2913	2.47	2.61	2.56	2.47	2.55	2.41	2.42	2.44	2.52	2.56	2.56	2.57
	Tacro + MP	#2909	2.36	2.43	2.39	2.43	2.37	2.36	2.35	2.23	2.26	2.22	2.14	2.28
	Tacro + MP*	#2887	2.46	2.4	2.43	2.32	2.47	2.3	2.4	2.32	2.4	2.33	2.37	2.45	*withdrawal of ISP after 3 months
	Tacro + MP*	#2869	2.43	2.53	2.43	2.37	2.41	2.41	2.41	2.37	2.46	2.34	2.44	2.45	*withdrawal of ISP after 3 months
	no ISP	#2500	2.39	2.28	2.37	2.4	2.29	2.39	2.43	2.4	2.48	2.25	2.37	2.41
	Cyclosporin	#2915	2.48	2.48	2.36	2.38	2.4	2.41	2.47	2.45	2.45	2.49	2.52	2.42
				pre I/R
			Days pre EHM Implantation										Days post EHM implantation
	Group	Macaque	-181	-160	-153	-146	-139	-130	-118	-105	-21	0	7	14	26	41	55	70	84	112	141	166
Cohort 3	Ctr. w/o ISP	#2651	2.41	2.26	2.42	2.28	2.29	2.27	2.37	2.34	2.46	2.27	2.32	2.2	2.44	2.28	2.41	2.23	2.24	2.35	2.48	2.23
		#2762	2.43	2.25	2.32	2.38	2.35	2.45	2.39	2.45	2.43	2.34	2.31	2.34	2.26	2.26	2.2	2.42	2.33	2.29	2.34	2.2
		#2868	2.29	2.26	2.31	2.34	n.d.	2.43	n.d.	2.42	n.d.	2.37	2.33	2.32	2.24	2.25	2.26	2.32	2.23	2.33	2.23	2.34
	Ctr. +ISP	#2650	2.48	2.41	2.24	2.37	2.37	2.25	2.39	2.41	2.38	2.28	2.21	2.33	2.14	2.3	2.35	2.22	2.33	2.32	2.18	2.11
		#2750	2.38	2.47	2.25	2.37	2.35	2.3	2.36	2.42	2.4	2.33	2.36	2.26	2.42	2.28	2.3	2.25	2.21	2.21	2.05	2.28
		#16299	2.34	2.26	2.4	2.32	2.33	2.34	2.39	2.39	2.46	2.32	2.26	2.23	2.14	2.19	2.21	2.16	2.1	2.22	2.08	2.17
		#2735	2.54	2.31	2.33	2.4	2.43	2.39	2.36	2.42	2.27	2.38	2.36	2.24	2.38	2.2	2.31	2.26	2.36	2.3	2.34	2.28
	2x EHM	#2907	2.33	2.34	2.43	2.41	2.3	2.58	2.36	2.41	2.42	2.23	2.22	2.38	2.3	2.52	2.33	2.26	2.33	2.43	2.27	2.23
		#16356	2.42	2.29	2.33	2.3	2.37	2.38	2.33	2.31	2.37	2.29	2.32	2.16	2.1	2.2	2.17	2.17	2.11	2.23	2.1	2.14
		#16721	2.27	2.36	2.49	2.42	2.29	2.45	2.34	2.3	2.3	2.11	2.04	2.23	2.09	2.25	2.3	2.14	2.1	2.1	2.13	2.24
	5x EHM	#2819	2.35	2.31	2.26	2.45	2.39	2.23	2.46	2.45	2.41	2.15	2.1	1.94	2.1	2.05	2.22	2.2	2.26	1.82	2.16	2.24
		#2884	2.37	2.43	2.42	2.55	n.d.	2.38	n.d.	2.33	2.41	2.3	2.44	2.41	2.05	2.37	2.38	2.44	2.46	2.34	2.46	2.41
		#16441	2.37	2.19	n.d.	2.34	n.d.	2.35	n.d.	2.3	2.31	2.27	2.33	2.37	2.18	2.42	2.3	2.3	2.19	2.29	2.22	2.13
				pre I/R								pre EHM
Mg in mmol/L (human reference range 0.7-1.05 mmol/L)
				Days post EHM implantation
	Group	Macaque	Pre	0	8	15	28	42	56	71	84	112	140	168
Cohort 1	Tacro + MP	#2444	0.93	0.69	0.58	0.44	0.48	0.46	0.58	0.47	0.62
	Tacrolimus	#2529	0.76	0.6	0.53	0.51	0.49	0.41	0.45	0.42	0.49
	Tacro + MP	#2441	0.79	0.65	0.47	0.52	0.45	0.39	0.46	0.42	0.61
	Tacrolimus	#2616	0.86	0.65	0.57	0.52	0.43	0.54	0.63	0.53	0.62
	Tacro + MP	#2520	0.62	0.5	0.49	0.48	0.47	0.44	0.5	0.47	0.57
	Tacro + MP	#2551	0.7	0.48	0.45	0.42	0.38	0.43	0.48	0.43	0.55
	no ISP	#2483	0.75	0.76	0.66	0.7	0.73	0.66	0.74	0.65	0.75
Cohort 2	Tacro + MP	#2506	0.72	0.67	0.59	0.48	0.5	0.45	0.43	0.5	0.56	0.47	0.47	0.6
	Tacro + MP	#2913	0.63	0.6	0.6	0.52	0.48	0.4	0.49	0.5	0.52	0.57	0.54	0.56
	Tacro + MP	#2909	0.74	0.62	0.5	0.53	0.48	0.4	0.44	0.33	0.44	0.38	0.39	0.48
	Tacro + MP*	#2887	0.68	0.64	0.56	0.5	0.52	0.44	0.52	0.47	0.48	0.61	0.57	0.67	*withdrawal of ISP after 3 months
	Tacro + MP*	#2869	0.75	0.65	0.49	0.46	0.54	0.53	0.53	0.55	0.53	0.64	0.62	0.67	*withdrawal of ISP after 3 months
	no ISP	#2500	0.77	0.55	0.7	0.65	0.75	0.69	0.77	0.75	0.81	0.67	0.71	0.8
	Cyclosporin	#2915	0.74	0.79	0.62	0.58	0.55	0.59	0.62	0.6	0.69	0.69	0.62	0.67
				pre I/R
			Days pre EHM Implantation										Days post EHM implantation
	Group	Macaque	-181	-160	-153	-146	-139	-130	-118	-105	-21	0	7	14	26	41	55	70	84	112	141	166
Cohort 3	Ctr. w/o ISP	#2651	0.66	0.61	0.62	0.67	0.68	0.63	0.61	0.65	0.66	0.63	0.62	0.56	0.7	0.59	0.67	0.57	0.59	0.59	0.71	0.62
		#2762	0.72	0.71	0.72	0.72	0.72	0.76	0.73	0.72	0.83	0.75	0.7	0.81	0.82	0.83	0.79	0.72	0.68	0.74	0.66	0.7
		#2868	0.73	0.74	0.64	0.67	n.d.	0.7	n.d.	0.68	n.d.	0.73	0.71	0.62	0.68	0.66	0.71	0.71	0.67	0.65	0.66	0.67
	Ctr. +ISP	#2650	0.67	0.65	0.63	0.66	0.7	0.68	0.64	0.63	0.64	0.58	0.52	0.5	0.44	0.46	0.48	0.42	0.5	0.51	0.43	0.49
		#2750	0.67	0.73	0.73	0.72	0.68	0.68	0.66	0.74	0.7	0.5	0.64	0.59	0.52	0.46	0.53	0.5	0.51	0.44	0.4	0.52
		#16299	0.71	0.74	0.68	0.7	0.78	0.79	0.69	0.8	0.69	0.53	0.43	0.42	0.47	0.45	0.45	0.41	0.39	0.41	0.33	0.46
		#2735	0.97	0.76	0.8	0.89	0.73	0.87	0.81	0.82	0.76	0.49	0.49	0.46	0.54	0.41	0.43	0.41	0.4	0.44	0.46	0.52
	2x EHM	#2907	0.66	0.68	0.75	0.69	0.61	0.72	0.67	0.63	0.72	0.5	0.52	0.47	0.51	0.66	0.64	0.49	0.7	0.58	0.59	0.58
		#16356	0.98	0.79	0.75	0.78	0.75	0.78	0.71	0.81	0.65	0.5	0.56	0.41	0.47	0.46	0.52	0.55	0.39	0.45	0.41	0.52
		#16721	0.8	0.78	0.78	0.84	0.71	0.73	0.8	0.75	0.8	0.39	0.35	0.44	0.37	0.34	0.35	0.41	0.43	0.27	0.34	0.51
	5x EHM	#2819	0.71	0.74	0.69	0.75	0.7	0.62	0.69	0.68	0.71	0.41	0.39	0.33	0.38	0.38	0.43	0.42	0.44	0.4	0.46	0.52
		#2884	0.7	0.7	0.76	0.73	n.d.	0.65	n.d.	0.73	0.72	0.58	0.57	0.43	0.48	0.51	0.43	0.57	0.47	0.59	0.59	0.53
		#16441	0.7	0.73	n.d.	0.65	n.d.	0.68	n.d.	0.67	0.61	0.45	0.44	0.46	0.34	0.5	0.43	0.42	0.49	0.44	0.51	0.42
				pre I/R								pre EHM
Cl in mmol/L (human reference range 98-107 mmol/L)
				Days post EHM implantation
	Group	Macaque	Pre	0	8	15	28	42	56	71	84	112	140	168
Cohort 1	Tacro + MP	#2444	114	111	109	108	109	109	110	111	108
	Tacrolimus	#2529	110	109	107	109	108	108	109	109	106
	Tacro + MP	#2441	110	110	108	107	110	110	109	108	108
	Tacrolimus	#2616	109	110	108	107	109	107	107	108	105
	Tacro + MP	#2520	106	108	109	111	108	108	107	106	108
	Tacro + MP	#2551	113	107	106	106	106	108	108	106	109
	no ISP	#2483	113	112	110	110	112	112	113	112	112
Cohort 2	Tacro + MP	#2506	110	105	105	107	107	108	107	110	110	108	107	107
	Tacro + MP	#2913	105	110	105	108	107	109	105	103	104	103	106	104
	Tacro + MP	#2909	110	111	105	109	108	107	106	106	103	105	105	100
	Tacro + MP*	#2887	106	106	105	105	104	104	104	103	105	106	107	104	*withdrawal of ISP after 3 months
	Tacro + MP*	#2869	108	109	107	108	106	111	106	107	105	106	109	106	*withdrawal of ISP after 3 months
	no ISP	#2500	112	109	106	110	107	112	108	109	115	108	109	110
	Cyclosporin	#2915	107	107	110	108	107	108	106	106	107	107	109	109
				pre I/R
			Days pre EHM Implantation										Days post EHM implantation
	Group	Macaque	-181	-160	-153	-146	-139	-130	-118	-105	-21	0	7	14	26	41	55	70	84	112	141	166
Cohort 3	Ctr. w/o ISP	#2651	108	111	109	110	108	108	107	107	109	110	111	110	111	110	109	111	110	110	114	107
		#2762	111	109	111	111	110	112	111	111	113	112	111	115	113	113	111	110	109	111	112	113
		#2868	107	106	109	108	n.d.	109	n.d.	109	n.d.	111	111	109	110	112	109	111	110	109	111	110
	Ctr. +ISP	#2650	108	106	109	110	108	112	110	108	107	111	110	107	107	108	107	109	104	107	108	101
		#2750	112	108	108	111	108	108	108	110	109	108	107	109	106	107	107	105	105	103	104	106
		#16299	111	107	109	108	108	109	109	111	111	106	106	108	107	106	108	105	105	106	108	109
		#2735	114	114	113	114	114	113	113	114	114	112	111	109	111	107	111	108	108	109	109	109
	2x EHM	#2907	106	104	107	108	108	110	109	107	104	108	105	104	100	101	102	100	101	99	94	94
		#16356	111	109	109	108	106	109	108	110	108	106	106	109	107	106	108	103	105	105	105	105
		#16721	111	105	103	111	109	107	109	106	111	105	105	107	105	104	102	104	104	105	104	104
	5x EHM	#2819	109	108	107	109	110	109	110	110	109	108	105	108	102	96	95	100	100	101	99	95
		#2884	109	109	106	110	n.d.	110	n.d.	108	111	111	106	107	108	101	97	96	96	98	95	94
		#16441	108	108	n.d.	109	n.d.	112	n.d.	108	108	108	110	108	106	107	105	107	107	105	108	104
				pre I/R								pre EHM

## Sheet: Hematology
Leukocytes in 10^3/µl (human reference range 4-11*10^3/µL)
				Days post EHM implantation
	Group	Macaque	Pre	0	8	15	28	42	56	71	84	112	140	168
Cohort 1	Tacro + MP	#2444	6.52	6.77	6.5	10.3	9.39	8	5.81	6.51	8.67
	Tacrolimus	#2529	17.5	13.8	8.38	12.7	15.1	13.1	11.8	10.7	9.01
	Tacro + MP	#2441	16.6	9.61	13.7	19	15	8.55	7.94	8.55	5.91
	Tacrolimus	#2616	14.9	20.2	18.3	12.8	13.6	12	7.78	10.2	15.3
	Tacro + MP	#2520	16.8	13.5	8.64	9.55	16.55	9.03	10.2	8.8	12
	Tacro + MP	#2551	16.9	15.6	18.8	9.76	7.87	12.5	8.63	11.7	9.2
	no ISP	#2483	10.9	8.92	7.92	12.7	8.9	11.3	14	6.74	11.6
Cohort 2	Tacro + MP	#2506	14.1	10.2	11.8	11.5	9.07	9.96	14.2	10.4	9.06	7.04	12	5.1
	Tacro + MP	#2913	19.4	10.7	10.5	9.76	7.77	9.45	10.8	9.41	6.42	13.7	9.97	7.18
	Tacro + MP	#2909	12.9	16.1	12.9	14.3	9.05	11.8	5.98	10.9	4.91	10.9	10.5	5.98
	Tacro + MP*	#2887	27.1	28	15.5	12.2	21.4	17.8	24.7	15.4	21.6	15.6	12.8	15.9	*withdrawal of ISP after 3 months
	Tacro + MP*	#2869	23.5	9.6	14.6	12.6	15.7	11	12.5	19.1	10.3	9.16	11.1	14.8	*withdrawal of ISP after 3 months
	no ISP	#2500	8.9	9.58	8.58	10.3	9.53	8.6	8.88	14.6	4.94	8.85	4.77	4.22
	Cyclosporin	#2915	9.43	8.8	13.1	13.8	10.4	8.91	11	10.3	11	13.6	11.66	7.82
				pre EHM
			Days pre EHM Implantation										Days post EHM implantation
	Group	Macaque	-181	-160	-153	-146	-139	-130	-118	-105	-21	0	7	14	26	41	55	70	84	112	141	166
Cohort 3	Ctr. w/o ISP	#2651	23.2	28.3	14.23	19.2	16.2	17.9	19.6	17.8	11.9	6.63	15	10.9	12.8	14	13.6	9.9	9.85	13	23.8	9.64
		#2762	5.86	5.39	6.62	7.41	5.69	6	6.11	6.06	10.1	7.35	6.27	6.49	5.9	7.04	5.52	7.08	6.03	7.58	9.33	6.32
		#2868	14.9	11.5	7.75	12.7	n.d.	7.97	n.d.	7.95	n.d.	6.93	6.23	6.23	7.14	6.56	10.7	9.39	8.75	9.68	8.28	10.5
	Ctr. +ISP	#2650	22.28	11.2	11.5	18.7	16.2	16.7	21.9	4.96	6.03	8.51	9.32	13	11.5	10.3	16.7	9.8	15.2	14.2	12.7	9.18
		#2750	14.3	6.41	6.98	14.8	12.6	9.36	16.4	17.2	9.37	14.7	14.3	11.7	9.47	13.5	8.6	9.13	7.59	10.1	8.94	7.77
		#16299	12.8	10.8	9.77	9.13	10.8	10.2	8.83	6.58	7.14	9.39	10.4	11.8	7.87	8.43	8.33	11.9	7.65	8.84	6.68	8.68
		#2735	12.5	5.13	4.78	7.72	5.68	8.04	7	6.58	4.62	6.18	6.43	5.63	5.39	5.89	5.16	5.29	4.49	5.13	5.76	5.27
	2x EHM	#2907	8.71	9.09	11.9	12.5	13.8	12.6	14.5	10.5	11.5	16.5	13.5	12.3	11.2	8.94	11.5	8.66	13.1	10.4	10.6	9.81
		#16356	13.9	10.2	6.87	8.09	4.73	4.39	5.19	3.97	5.6	7.37	8.9	7.45	5.78	6.56	7.29	6.14	8.74	8.88	5.33	6.93
		#16721	15.6	12.1	7.49	8.22	9.23	14.6	10.1	6.38	6.8	12.7	8.97	7.88	10.6	7	7.03	8.13	7.51	6.78	5.15	5.91
	5x EHM	#2819	10.5	11.1	11.1	12	11.8	14.1	10.2	10.2	8.55	10.3	11.6	11.7	9.05	14.4	15.6	10.5	7.64	10.1	10.4	8.62
		#2884	18.5	11.5	16.2	11.2	n.d.	8.6	n.d.	16.7	8.09	9.3	10.1	10.4	7.42	7.77	7.15	5.29	7.79	8.48	8.88	6.8
		#16441	10	11.6	n.d.	8.04	n.d.	8.07	n.d.	8.54	5.63	8.5	6.8	7.93	9.88	7.91	8.08	8.76	8.06	9.99	11.3	6.09
				pre I/R								pre EHM
Lymphocytes % of total Leukocytes (human reference range 20-45%)
				Days post EHM implantation
	Group	Macaque	Pre	0	8	15	28	42	56	71	84	112	140	168
Cohort 1	Tacro + MP	#2444	42.5	17.4	24.2	14	13.5	17.3	23.3	31.8	21.3
	Tacrolimus	#2529	9	9.1	18.1	11	8.6	12.3	12.3	23.5	20.4
	Tacro + MP	#2441	5.9	9	13.7	6.4	6.2	12.5	17.4	22.3	15.2
	Tacrolimus	#2616	12.4	11	19.3	32.6	16.8	32	32	38.2	11.1
	Tacro + MP	#2520	6.6	8.2	15.7	9	7	21.8	14.8	25.1	32
	Tacro + MP	#2551	12.7	11.8	14	16.4	29.4	13.5	35.8	34.2	31.1
	no ISP	#2483	22.5	21.1	29.8	26.5	29.3	24.5	30	72	29
Cohort 2	Tacro + MP	#2506	15	31.1	36.1	26.6	30.9	33	18.3	26.5	27.6	42	28.6	47
	Tacro + MP	#2913	11.4	17	29.4	17.9	28.8	28.6	28.9	36.3	44.5	30.8	35.4	47.8
	Tacro + MP	#2909	14.2	9.9	15.4	13.1	19.3	19.2	28.3	26.6	43.6	21.1	18.5	44.2
	Tacro + MP*	#2887	8	7	16	20.5	12.4	28	12	33.9	14.3	55	41.9	32.7	*withdrawal of ISP after 3 months
	Tacro + MP*	#2869	10	25	12	10.8	11.1	12.4	14	9.2	15.9	39	36.4	20.4	*withdrawal of ISP after 3 months
	no ISP	#2500	16.2	17.3	17.9	26.7	23.1	19	16.2	9.9	25.8	24	20.8	23.7
	Cyclosporin	#2915	19.2	26	16.4	22.1	25.4	23.1	26.1	32.4	24.9	28.4	17	34.6
				pre EHM
			Days pre EHM Implantation										Days post EHM implantation
	Group	Macaque	-181	-160	-153	-146	-139	-130	-118	-105	-21	0	7	14	26	41	55	70	84	112	141	166
Cohort 3	Ctr. w/o ISP	#2651	7	3	5	2	5.8	7.4	7	10	11.5	17.5	10	11.9	9.9	8.3	12	16	12.2	7.7	5	16
		#2762	23.1	29	18.8	23	23	28	28.8	24.7	16.6	16.2	24.3	26.9	26.4	22.6	30.9	22.9	28.7	20.7	14.4	22
		#2868	17	22.9	33.6	17.2	n.d.	38.5	n.d.	42.8	n.d.	39.3	44.1	57	48.7	37.2	29.1	30.8	40.3	38.2	30.2	29.3
	Ctr. +ISP	#2650	4	13.4	22.5	7.1	7.4	8.4	5.6	24.5	21	20.1	13.6	7.5	11.3	12.6	9	13	11.9	10.2	10.9	20
		#2750	9.6	30.8	15.9	10.9	11.8	23.5	8.3	9.8	25.9	10.3	11	12.9	17.1	8.4	20.3	13.3	19.1	24	22.6	20.2
		#16299	19.3	28.7	21.3	20.1	24.7	17	33.4	27	31.2	22.9	19.1	20	23.9	24	29	16.5	28.2	24.4	35.1	31.1
		#2735	9	22	24.1	23	18.7	22	21.5	18.9	28.3	16	19.8	23	34.3	25.1	36.9	30.9	37	37	29	38.6
	2x EHM	#2907	26.3	23.3	18	10.6	16	15.2	12.1	17	17.6	11.8	19	18.6	23.9	25.3	26.1	33.3	23.1	30.7	35	29.6
		#16356	13.1	21.2	27	18	42.8	25.3	24.8	26.8	28.1	26.7	33	21.9	32.2	29.9	23.2	23	27.3	16.2	29.2	27.2
		#16721	10.9	22.4	23.3	15	18.4	12	21	29.5	33.5	15.9	24.6	20.8	22.6	35.5	30.8	25.1	34.4	45.8	52.1	32.3
	5x EHM	#2819	15.9	22	19	11.7	11.3	13	19	21.1	22.8	16.1	12.2	14.7	18.3	11.9	15	14.1	31.3	24.9	24	23.7
		#2884	25.1	48.3	21.4	37.4	n.d.	44.2	n.d.	23.8	46.9	41.5	37.5	32.7	46.1	38	46.9	55	48	45.8	57.8	63
		#16441	28.8	22.4	n.d.	25.6	n.d.	24.3	n.d.	23.9	36.9	22.3	29.4	22.7	18.8	17.7	19.1	17.7	24.8	23.7	22.3	44
				pre I/R								pre EHM
Monocytes % of total Leukocytes (human reference range 3-13%)
				Days post EHM implantation
	Group	Macaque	Pre	0	8	15	28	42	56	71	84	112	140	168
Cohort 1	Tacro + MP	#2444	5.8	3.8	8.8	5.6	7.4	6.7	6.7	7.3	7.6
	Tacrolimus	#2529	5	6.7	6.7	7.4	6.2	5.3	6.3	7	6.5
	Tacro + MP	#2441	4.2	5.4	6.4	3.4	4.3	4.1	4.3	4.8	0.7
	Tacrolimus	#2616	2.6	4	4.7	4.3	3.3	5	2	3.1	3.7
	Tacro + MP	#2520	4.8	4.6	3.6	3.2	3	7	6.8	8.6	6
	Tacro + MP	#2551	4.8	5.2	2	8	6	4.6	9.6	6.2	6.3
	no ISP	#2483	6.2	4.2	4.2	3.6	7.1	5.8	7	5	6
Cohort 2	Tacro + MP	#2506	4.8	5.6	9.2	6	5.1	6.8	5.1	6	8.2	6.8	4.8	10
	Tacro + MP	#2913	3.6	2.8	6.2	2.9	4.6	4.6	4.8	5.6	7.8	4.6	5.2	3.7
	Tacro + MP	#2909	5.4	6.5	5.5	6.3	6.1	4.9	8.4	4.9	9.2	5.3	4.4	6
	Tacro + MP*	#2887	6	5	3	3.6	4.3	5	6	5.2	4.7	3	3.2	4.7	*withdrawal of ISP after 3 months
	Tacro + MP*	#2869	5	6	6	5.7	6.7	5.8	8.2	5.8	13	7	7.7	6.7	*withdrawal of ISP after 3 months
	no ISP	#2500	7	6.5	11.4	6.7	6.7	5.4	7.7	5.3	8.4	6	7.6	11
	Cyclosporin	#2915	4.4	6	5.2	7	4.9	5.1	7.1	6.4	4.5	7.8	5.8	5.5
				pre I/R
			Days pre EHM Implantation										Days post EHM implantation
	Group	Macaque	-181	-160	-153	-146	-139	-130	-118	-105	-21	0	7	14	26	41	55	70	84	112	141	166
Cohort 3	Ctr. w/o ISP	#2651	4	3	2	3	5	5.1	3.5	2	6.6	6.6	5	3.6	6.2	3.4	4	2	4.7	4.6	5	7.6
		#2762	4.5	10.5	3.3	3	6	6	1.9	5.3	4.4	4.3	5.6	4.6	5.2	3.3	4.4	5.1	5.8	3.8	4.2	7
		#2868	5	4.6	7.1	3.5	n.d.	4.1	n.d.	4.5	n.d.	6.1	5.1	8.5	10	6.7	6.3	5.3	8.6	7.6	7.2	5.8
	Ctr. +ISP	#2650	7	7	0.1	5.8	4.7	6.4	4.2	7.2	7.8	6.8	4.2	3	6.4	4.7	5.5	5	4.8	5.6	3.7	5
		#2750	4.8	6.6	4.7	5.1	3.9	6	4	6.1	9.8	2.9	4.8	4.3	4.8	3.4	5.4	4.4	8	4.7	4.7	5.8
		#16299	10.8	11.2	8.5	13.7	8.9	9.7	11.2	10.4	15.4	10.2	10.6	9.9	11.4	10.5	3	10	13.6	10.5	12.7	13.8
		#2735	2	16.3	4	5	4.5	3	3.7	3.8	4.5	4.1	4.8	2.7	7.2	4.7	5.5	4.8	7	0	7.5	1.6
	2x EHM	#2907	4	7.9	4.8	4.3	3	4.6	4.7	6	4.6	5.8	6.4	4.7	5.8	5.6	5.8	5.8	5.7	5.6	5.8	5.9
		#16356	4.9	7.6	9.5	12	11.4	7.8	7.3	7.7	11.6	8.3	7.1	6.5	10.2	8.5	7.3	9	7.7	5.9	8.1	9
		#16721	9.2	12.6	9.5	10.3	7	8.7	6.8	13.4	8.7	10.7	6.5	6.5	9.1	15.2	11.3	9.4	12.5	9.4	9.7	13
	5x EHM	#2819	4.6	6	5	4.6	3.4	2.9	3.8	4.6	5.4	3	3.5	4.6	5.7	4.5	5	4.3	8.1	5.2	6	5
		#2884	4.5	4.2	5.1	4	n.d.	4.4	n.d.	6.7	6.5	4.5	7.6	3.9	6	4.8	5.3	5	5.5	5.6	6.1	5
		#16441	9.4	5.3	n.d.	7.5	n.d.	8.6	n.d.	8.4	10.2	7	9.3	9.2	10.7	9.3	13.1	7.8	10.2	8	9.5	9
				pre I/R								pre EHM
Neutrophils % of total Leukocytes (human reference range 40-76%)
				Days post EHM implantation
	Group	Macaque	Pre	0	8	15	28	42	56	71	84	112	140	168
Cohort 1	Tacro + MP	#2444	50.4	78.6	64.5	78.9	78.7	75.5	68	59.2	69
	Tacrolimus	#2529	83	83.9	74.3	80.8	84.3	81.9	80.8	68.9	72.5
	Tacro + MP	#2441	89.6	83.9	79.3	89.4	89.1	81.3	76.5	72.3	82.3
	Tacrolimus	#2616	84.8	83	75	61.6	79.9	60	64	56.5	84.5
	Tacro + MP	#2520	88.4	86.4	79.2	87.5	85	70.6	77.6	65.5	58
	Tacro + MP	#2551	82.1	82.5	79	73.7	63.9	81.4	53.4	59.2	62.1
	no ISP	#2483	69.7	73.3	64.2	69.1	62.8	68.5	63	20	63.5
Cohort 2	Tacro + MP	#2506	78.6	61.9	53.5	66.7	61.8	59.3	76.5	66.3	63.2	48.4	65.9	39
	Tacro + MP	#2913	84.7	79.2	63.7	78.3	65.9	66	66.2	57.1	45.2	63.6	59.1	47.2
	Tacro + MP	#2909	78.8	82.9	78.3	79.5	73.5	75.2	62.3	67.4	46.1	72.3	76.6	47.4
	Tacro + MP*	#2887	84	87	78	75.4	82.8	65	81	59.8	80.8	37	54	61.6	*withdrawal of ISP after 3 months
	Tacro + MP*	#2869	83	67	80	83.3	81.5	80.4	75.8	84.4	69.6	40	55.3	72.2	*withdrawal of ISP after 3 months
	no ISP	#2500	76.1	74.9	70.1	65.9	69.4	75.1	74.8	84.3	64.3	69	70.2	64
	Cyclosporin	#2915	76	65	77.8	70.5	69.3	70.1	65.2	59.2	69.2	62.9	75.8	57.2
				pre I/R
			Days pre EHM Implantation										Days post EHM implantation
	Group	Macaque	-181	-160	-153	-146	-139	-130	-118	-105	-21	0	7	14	26	41	55	70	84	112	141	166
Cohort 3	Ctr. w/o ISP	#2651	88	93	91	95	89	87.2	89.3	85	79.9	73.2	83	84.1	83.6	87.4	82	80	80.8	86.5	90	75.9
		#2762	72.2	54.9	76.9	74	71	56	68.4	67.7	78.2	78.9	67.9	65.6	65.1	71.3	62.8	69.8	62.7	73.6	80.6	69
		#2868	76.3	69.2	55.7	78.2	n.d.	54.1	n.d.	45.6	n.d.	51.6	48.3	30.7	37	52.3	61.2	60.4	45.7	49.7	56.5	61.4
	Ctr. +ISP	#2650	87	78.6	77.1	86.4	87.5	85.1	89.3	67.3	70.8	72.8	81.9	88.2	81.8	81.6	85.1	77	82.5	83.8	83.5	71
		#2750	84.9	61.8	77.7	82.7	83.2	68	87.1	82.7	62.7	85.6	82.8	81.6	76.3	87.3	74.1	81	70.5	69.7	72.5	72
		#16299	69.2	59.9	69	63.8	65	72.3	55.1	61.3	53.3	66.1	69.5	69.9	63.6	65	66	72.7	56.6	64.3	51.4	54.1
		#2735	89	57.9	68.4	71	74	73	74.5	76.5	66.4	79.7	75.3	73.9	58	67.4	57.1	63.2	45	61	61.4	59.1
	2x EHM	#2907	68.3	67.4	76.4	84.6	80	79.5	83.2	74	76.3	82	74.1	76.3	68.7	68.2	67.6	60	70.4	63.1	58.7	62.6
		#16356	81.6	70.6	62.6	70	44.9	63.7	67.7	64.1	57.8	63.9	59.4	70.7	56.5	60.8	68.9	66.4	63.1	77.1	61.7	61.7
		#16721	79.2	64.1	66.4	72.6	73.4	78.4	71.4	55	56.4	72.9	68.5	71.7	67.3	48.3	57	64.4	51.5	43	37.7	54.1
	5x EHM	#2819	79.1	69	74	83.4	84.9	83.6	76.6	73.2	71.5	79.9	84.1	80.2	75.3	83.3	78	81.1	58.9	69.3	70	70.2
		#2884	67	46.9	71.9	57.5	n.d.	49.4	n.d.	68.2	45.3	53.5	54	62.6	45.9	56.2	45.4	38	44.6	46.9	34.7	32
		#16441	60.9	70.5	n.d.	66.5	n.d.	66.5	n.d.	67.4	51.5	69.8	59.6	66.7	69.9	72.3	67.6	72.7	64.5	67.8	67.7	41
				pre I/R								pre EHM
Basophils % of total Leukocytes (human reference range 3-13%)
				Days post EHM implantation
	Group	Macaque	Pre	0	8	15	28	42	56	71	84	112	140	168
Cohort 1	Tacro + MP	#2444	0.6	0.2	0.6	0.3	0.1	0.1	0.6	0	0.3
	Tacrolimus	#2529	1	0.1	0.2	0.7	0.3	0	0.3	0.5	0.3
	Tacro + MP	#2441	0	0.2	0.1	0.1	0	1.3	0.2	0.1	0.1
	Tacrolimus	#2616	0	0	0.6	0.8	0	0	0	0.7	0.5
	Tacro + MP	#2520	0.1	0.4	0.7	0	1	0.3	0.3	0.7	0
	Tacro + MP	#2551	0.2	0.5	1	1.1	0.5	0.5	1	0.4	0.2
	no ISP	#2483	0.1	0.8	1.6	0.5	0.3	0.6	0	1	0.1
Cohort 2	Tacro + MP	#2506	0.4	0.6	0.3	0	0.5	0.2	0	0.7	0.7	1.5	0.5	0
	Tacro + MP	#2913	0	0.9	0.4	0.5	0.6	0.3	0.1	0.7	1	0.6	0.2	0.8
	Tacro + MP	#2909	0.7	0.4	0.4	0.5	0.7	0.4	0.6	0.6	1.1	0.4	0.6	0.7
	Tacro + MP*	#2887	0	0	0	0.4	0.1	0	0	0.8	0.2	0	0.9	1	*withdrawal of ISP after 3 months
	Tacro + MP*	#2869	0	0	0	0.2	0.1	0.3	0.5	0.2	0.4	0	0.6	0.8	*withdrawal of ISP after 3 months
	no ISP	#2500	0.4	0.3	0.1	0.5	0.4	0.2	1	0.1	0.5	0	0	0.8
	Cyclosporin	#2915	0.1	0	0.2	0.4	0.2	1.6	1.2	0.8	0.2	0.5	0.6	0.6
				pre I/R
			Days pre EHM Implantation										Days post EHM implantation
	Group	Macaque	-181	-160	-153	-146	-139	-130	-118	-105	-21	0	7	14	26	41	55	70	84	112	141	166
Cohort 3	Ctr. w/o ISP	#2651	0	1	0	0	0.3	0.3	0.2	0	0.7	0.4	0	0.4	0.3	0.1	0	0	0.5	0.2	0	0.5
		#2762	0.2	0.3	0.3	0	0	0	0.1	1.2	0.4	0.2	2.1	0.7	1.8	1	1.1	0	1.1	0.3	0.2	0
		#2868	0.8	0.2	0.7	0.2	n.d.	0.4	n.d.	1.4	n.d.	0.7	0.4	1	1.5	0.3	0.6	0.4	0.9	1.1	1.5	0.7
	Ctr. +ISP	#2650	1	0.1	0.3	0.7	0.5	0.2	0.2	0.9	0.3	0.3	0.3	0.4	0.1	0.5	0	1	0.2	0.4	0.3	1
		#2750	0.1	0.9	1	0.1	0.4	1.1	0.3	0.4	0.8	0	0.1	0.2	0.4	0.1	0.1	0.1	0.4	0.1	0.2	0.2
		#16299	0.2	0.2	0.2	2.1	0.4	0.4	0.1	0.7	0.1	0.5	0.3	0.2	0.6	0.4	0	0.5	1.1	0.4	0.3	0.5
		#2735	0	0.3	1.1	0	0.4	0	0.1	0.6	0.4	0	0.2	0.1	0.4	2.2	0.2	0.7	4	0	1.7	0.4
	2x EHM	#2907	0	0.7	0.4	0.1	0	0.3	0.1	0	0.5	0	0.1	0.1	0.3	0.4	0.2	0.4	0	0.1	0.1	0.6
		#16356	0.1	0.4	0.8	0	0.7	0.5	0	1.2	2.1	0.5	0.2	0.6	0.8	0.5	0.3	1	1.1	0.6	0.8	1.3
		#16721	0.2	0.3	0.5	0.8	0.8	0.7	0.5	1.6	1.2	0.4	0.2	0.8	0.9	0.6	0.7	1	1.3	1.6	0.2	0.1
	5x EHM	#2819	0.1	1	0	0.1	0	0.1	0.2	0.7	0	0.3	0.2	0.1	0.1	0.1	0	0.2	0.2	0.3	0	0.1
		#2884	0.7	0.2	0.3	0.9	n.d.	2	n.d.	0.6	1.1	0	0.9	0.2	1.1	0.4	1	0	0.9	0.7	0.5	0
		#16441	0.7	1.2	n.d.	0.1	n.d.	0.3	n.d.	0.1	1.2	0.4	1	0.3	0.2	0.4	0	0.2	0.2	0.1	0.2	1
				pre I/R								pre EHM
Eosinophils % of total Leukocytes (human reference range ≤8%)
				Days post EHM implantation
	Group	Macaque	Pre	0	8	15	28	42	56	71	84	112	140	168
Cohort 1	Tacro + MP	#2444	0.7	0	1.9	1.2	0.3	0.5	1.4	1.7	1.7
	Tacrolimus	#2529	1	0.1	0.6	0.1	0.6	0.5	0.3	0.2	0.3
	Tacro + MP	#2441	0.4	1.5	0.2	0.6	0.4	0.8	1.6	0.5	1.6
	Tacrolimus	#2616	0.2	2	0.5	0.6	0	3	2	1.5	0.3
	Tacro + MP	#2520	0.1	0.4	0.8	0.2	4	0.3	0.5	0.2	4
	Tacro + MP	#2551	0.1	0	0	0.8	0.2	0.1	0.2	0	0.3
	no ISP	#2483	1.4	0.6	0.3	0.2	0.4	0.5	0	1	1.2
Cohort 2	Tacro + MP	#2506	1.2	0.7	0.8	0.7	1.7	0.6	0	0.5	0.3	1.3	0.3	4
	Tacro + MP	#2913	0.2	0.2	0.3	0.3	0.2	0.4	0	0.3	1.4	0.5	0	0.6
	Tacro + MP	#2909	1	0.3	0.3	0.6	0.3	0.4	0.4	0.4	0	0.8	0	1.7
	Tacro + MP*	#2887	0	1	3	0	0.5	1	1	0.3	0	5	0	0	*withdrawal of ISP after 3 months
	Tacro + MP*	#2869	2	2	2	0	0.6	1.1	1.5	0.3	1.1	14	0	0	*withdrawal of ISP after 3 months
	no ISP	#2500	0.3	1	0.5	0.3	0.5	0.4	0.3	0.5	1	1	1.4	0.5
	Cyclosporin	#2915	0.4	1	0.3	0	0.3	0.2	0.4	1.3	1.2	0.4	0.7	2.1
				pre I/R
			Days pre EHM Implantation										Days post EHM implantation
	Group	Macaque	-181	-160	-153	-146	-139	-130	-118	-105	-21	0	7	14	26	41	55	70	84	112	141	166
Cohort 3	Ctr. w/o ISP	#2651	1	0	2	0	0	0	0	2	1.2	2.3	2	0	0	0.9	2	2	1.8	1.1	0	0
		#2762	0	3.4	0.7	0	0	10	0.8	1.2	0.4	0.3	0	2.4	1.5	1.9	0.7	2.2	1.6	1.6	0.7	2
		#2868	0.9	3	2.8	1	n.d.	2.9	n.d.	5.8	n.d.	2.3	2	2.9	2.8	3.5	2.8	3.2	4.6	3.4	4.6	2.8
	Ctr. +ISP	#2650	1	3.2	0	0	0	0	0.7	0	0	0	0	0.9	0.4	0.5	0.3	4	0.6	0	1.6	3
		#2750	0.6	0	0.7	1.2	0.7	1.4	0.4	1	0.9	1.2	1.3	1	1.4	0.8	0.4	1.2	2	1.5	0	1.9
		#16299	0.5	0.1	1	0.3	0.9	0.6	0.3	0.6	0	0.3	0.5	0	0.5	0.2	2	0.2	0.5	0.5	0.6	0.4
		#2735	0	1.7	2.5	1	2.4	2	0.1	0.2	0.4	0.2	0	0.3	0.2	0.6	0.3	0.3	6	1	0.4	0.3
	2x EHM	#2907	1.4	0.6	0.4	0.4	1	0.4	0	3	1	0.4	0.5	0.3	1.4	0.5	0.3	0.5	0.7	0.5	0.3	1.2
		#16356	0.2	0.2	0.2	0	0.2	2.8	0.1	0.3	0.4	0.6	0.4	0.2	0.3	0.3	0.2	0.5	0.8	0.2	0.2	0.8
		#16721	0.5	0.5	0.2	1.3	0.4	0.1	0.1	0.4	0.2	0.1	0.3	0.2	0.1	0.4	0.2	0.2	0.3	0.2	0.3	0.5
	5x EHM	#2819	0.3	2	2	0.2	0.4	0.4	0.3	0.4	0.3	0.7	0.1	0.3	0.7	0.3	2	0.3	1.6	0.3	0	1
		#2884	2.7	0.5	1.3	0.2	n.d.	0	n.d.	0.7	0.3	0.5	0	0.6	0.9	0.6	1.4	2	1	1	0.9	0
		#16441	0.2	0.5	n.d.	0.3	n.d.	0.4	n.d.	0.2	0.1	0.4	0.7	1	0.3	0.3	0.2	1.6	0.3	0.5	0.3	4
				pre I/R								pre EHM
Thrombocytes in 10^3/µl (human reference range 150-350*10^3/µL)
				Days post EHM implantation
	Group	Macaque	Pre	0	8	15	28	42	56	71	84	112	140	168
Cohort 1	Tacro + MP	#2444	203	263	253	364	246	276	272	252	255
	Tacrolimus	#2529	240	232	341	358	299	299	296	306	258
	Tacro + MP	#2441	266	343	441	442	303	359	287	326	aggregation
	Tacrolimus	#2616	352	346	582	512	360	447	395	456	407
	Tacro + MP	#2520	303	342	370	488	344	412	388	383	396
	Tacro + MP	#2551	303	300	466	441	351	309	389	268	322
	no ISP	#2483	366	311	484	498	359	496	376	354	374
Cohort 2	Tacro + MP	#2506	315	329	439	484	310	369	289	290	295	257	408	337
	Tacro + MP	#2913	349	383	750	514	407	527	356	484	427	507	444	422
	Tacro + MP	#2909	369	363	544	407	383	346	408	442	363	365	331	336
	Tacro + MP*	#2887	299	333	353	333	267	257	319	370	285	315	343	282	*withdrawal of ISP after 3 months
	Tacro + MP*	#2869	282	354	190	381	295	320	290	281	233	aggregation	244	264	*withdrawal of ISP after 3 months
	no ISP	#2500	268	309	536	462	aggregation	262	293	329	306	262	289	279
	Cyclosporin	#2915	344	381	477	549	388	414	418	395	410	398	aggregation	397
				pre I/R
			Days pre EHM Implantation										Days post EHM implantation
	Group	Macaque	-181	-160	-153	-146	-139	-130	-118	-105	-21	0	7	14	26	41	55	70	84	112	141	166
Cohort 3	Ctr. w/o ISP	#2651	aggregation	434	aggregation	438	323	380	367	384	321	414	354	398	aggregation	344	401	352	292	313	295	331
		#2762	261	255	242	342	328	237	268	274	188	277	314	261	254	222	274	251	240	218	239	191
		#2868	303	320	533	420	n.d.	300	n.d.	282	n.d.	256	295	274	292	270	282	254	283	242	277	303
	Ctr. +ISP	#2650	aggregation	383	321	398	372	299	291	347	256	285	339	319	355	333	365	237	397	366	315	272
		#2750	178	289	aggregation	308	260	258	207	217	248	252	167	185	207	231	208	200	203	192	211	227
		#16299	329	385	471	482	621	422	409	425	374	362	363	424	391	367	342	366	372	398	327	338
		#2735	315	281	627	462	401	401	323	306	317	378	382	367	356	346	329	277	332	310	382	aggregation
	2x EHM	#2907	280	297	459	393	339	340	215	327	254	248	356	480	390	aggregation	337	354	321	319	296	334
		#16356	298	389	308	470	433	346	318	268	268	274	436	415	313	315	300	302	290	274	269	276
		#16721	371	437	486	431	419	430	387	415	357	393	512	467	443	427	355	350	379	331	298	338
	5x EHM	#2819	348	426	342	504	430	296	361	322	312	381	495	462	341	358	300	366	307	264	267	318
		#2884	321	374	595	485	n.d.	322	n.d.	344	358	308	504	453	379	328	264	aggregation	358	336	288	347
		#16441	346	453	n.d.	509	n.d.	363	n.d.	374	362	449	456	583	400	442	447	397	363	346	419	328
				pre I/R								pre EHM
Erythrocytes in 10^6/µl (human reference range [♀] 3.9-5.1 and [♂] 4.4-5.9*10^6/µL)
				Days post EHM implantation
	Group	Macaque	Pre	0	8	15	28	42	56	71	84	112	140	168
Cohort 1	Tacro + MP	#2444	5.58	5.26	5.1	4.83	5.46	5.39	5.55	5.66	5.73
	Tacrolimus	#2529	4.93	5.35	4.87	4.89	4.84	5.02	5.41	5.44	5.44
	Tacro + MP	#2441	5.78	6.37	5.52	5.35	6.08	5.85	5.58	5.59	5.94
	Tacrolimus	#2616	5.52	5.63	5.28	5.3	5.42	5.54	5.24	5.6	5.54
	Tacro + MP	#2520	5.39	5.73	5.58	5.11	5.47	5.5	5.56	5.61	5.55
	Tacro + MP	#2551	5.51	5.62	4.94	4.59	5.15	5.11	5.46	5.3	5.21
	no ISP	#2483	5.38	5.4	4.54	4.59	5.28	5.28	5.67	5.57	5.59
Cohort 2	Tacro + MP	#2506	6.22	5.81	5.42	5.08	5.32	5.43	5.54	5.6	5.61	5.84	5.4	5.46
	Tacro + MP	#2913	5.75	5.68	5.38	5.14	5.46	5.44	5.52	6.16	6.08	6.17	5.59	5.57
	Tacro + MP	#2909	5.48	5.87	5.73	5.7	5.81	5.67	5.74	6.03	5.75	5.78	5.71	5.74
	Tacro + MP*	#2887	6.15	6.03	5.5	5.5	5.85	5.71	5.93	6.13	6.08	5.92	5.86	6.12	*withdrawal of ISP after 3 months
	Tacro + MP*	#2869	5.91	5.27	5.63	5.81	5.95	6	6.2	6.03	6.22	5.63	5.84	5.93	*withdrawal of ISP after 3 months
	no ISP	#2500	5.63	5.88	5.56	5.27	5.43	5.63	5.68	5.65	5.63	5.74	5.37	5.64
	Cyclosporin	#2915	5.87	5.85	5.09	5.41	5.42	5.46	5.07	5.53	5.49	5.95	5.15	5.39
				pre I/R
			Days pre EHM Implantation										Days post EHM implantation
	Group	Macaque	-181	-160	-153	-146	-139	-130	-118	-105	-21	0	7	14	26	41	55	70	84	112	141	166
Cohort 3	Ctr. w/o ISP	#2651	5.86	5.5	4.57	4.84	5.33	5.41	5.74	6.29	5.77	5.65	5.42	5.74	5.81	5.76	6.23	5.81	5.93	5.8	6.44	5.83
		#2762	5.83	5.73	4.71	4.94	5.36	5.82	5.87	5.96	6.21	5.89	5.67	5.68	6.23	5.93	5.81	6.13	6.07	6.21	6.23	6.21
		#2868	5.28	5.34	3.76	4.5	n.d.	5.23	n.d.	5.49	n.d.	5.55	5.48	5.32	5.52	5.58	5.97	5.69	5.9	5.79	5.66	5.75
	Ctr. +ISP	#2650	5.55	5.42	4.76	5.3	5.48	5.64	5.7	5.99	5.73	5.68	5.95	5.87	5.81	5.77	5.78	5.72	5.86	5.64	5.88	5.82
		#2750	5.58	5.34	4.44	4.9	5.15	5.65	5.46	5.76	5.55	6.01	5.82	5.48	5.74	5.51	5.34	5.14	5.44	5.41	5.24	5.47
		#16299	5.92	5.89	4.98	5.08	5.09	5.47	5.71	5.83	6.15	5.86	5.81	5.82	5.81	5.75	5.71	5.94	5.81	5.9	5.89	5.7
		#2735	6.25	5.72	4.29	4.99	5.39	5.75	5.62	6.26	6.33	6.33	6.05	5.87	5.98	6.11	6.22	6.14	6.3	6.13	6.6	6.3
	2x EHM	#2907	5.09	4.93	4.54	4.68	4.71	5.09	5.08	5.09	5.31	5.44	5.2	5.2	5.75	6.06	5.15	5.06	5.63	5.43	5.62	5.26
		#16356	5.17	4.87	3.63	4.02	4.57	4.78	5.02	5.37	5.08	5.35	5.03	5	4.85	5.04	5.08	5.07	5.15	5.45	5.16	5.2
		#16721	5.79	5.61	5.35	5.34	5.35	5.4	5.8	5.34	5.79	5.86	5.31	5.4	4.99	5.94	5.96	5.7	5.81	5.97	6.02	6.2
	5x EHM	#2819	5.22	5.12	4.09	4.79	4.72	4.94	5.21	5.37	5.45	5.3	5.2	4.94	5.47	5.8	5.51	5.85	5.49	5.51	5.52	5.29
		#2884	5.45	5.3	5.09	5.16	n.d.	5.2	n.d.	5.85	5.92	5.6	5.41	5.32	5.77	5.69	6.23	5.46	5.51	5.27	5.72	5.25
		#16441	5.58	5.63	n.d.	4.97	n.d.	5.78	n.d.	6.23	6.47	6.34	5.74	5.52	5.62	5.89	6.08	6.1	5.93	5.77	5.87	5.76
				pre I/R								pre EHM
Hemoglobin in g/dL (human reference range [♀] 11.5-15 and [♂] 13.5-17.5 g/dL)
				Days post EHM implantation
	Group	Macaque	Pre	0	8	15	28	42	56	71	84	112	140	168
Cohort 1	Tacro + MP	#2444	13	12.1	11.5	11	12.4	12.5	12.6	12.9	13.1
	Tacrolimus	#2529	12	12.8	11.8	11.4	12	12	12.8	12.9	12.6
	Tacro + MP	#2441	14.1	15.8	13.7	13.3	14.7	14.2	13.8	13.7	14.4
	Tacrolimus	#2616	13.2	12.7	12	12	12.3	12.4	11.8	12.6	12.7
	Tacro + MP	#2520	13	13.9	13.4	12.9	13.3	13.5	13.5	13.2	13.8
	Tacro + MP	#2551	13.1	13.2	11.7	10.6	12.3	12.2	13	12.7	12.3
	no ISP	#2483	13.7	13.9	11.7	11.7	13.4	13	14.4	13.5	13.7
Cohort 2	Tacro + MP	#2506	14.4	13.6	11.8	11.5	12.5	12	12.9	13	12.8	13.6	12	12.6
	Tacro + MP	#2913	13.2	13.1	12.3	12	12.9	12.8	13.3	14.2	13.4	13.9	12.7	13.3
	Tacro + MP	#2909	12.7	13.2	12.9	12.7	13.1	13.2	12.9	13.2	12.8	12.6	12.6	13.2
	Tacro + MP*	#2887	14.5	13.7	13.4	12.6	13.4	13.5	13.4	14	13.7	13.3	13.5	13.4	*withdrawal of ISP after 3 months
	Tacro + MP*	#2869	14.1	12.8	13.5	13.6	13.9	13.9	13.9	13.8	13.6	13.2	13.3	13.3	*withdrawal of ISP after 3 months
	no ISP	#2500	13.3	13.1	13.4	12.5	12.7	13.2	13.5	13	13.4	13.2	12.5	13.5
	Cyclosporin	#2915	14.2	14.2	12.5	12.9	12.7	12.8	12.5	13.1	13.2	14.4	12.5	13.1
				pre I/R
			Days pre EHM Implantation										Days post EHM implantation
	Group	Macaque	-181	-160	-153	-146	-139	-130	-118	-105	-21	0	7	14	26	41	55	70	84	112	141	166
Cohort 3	Ctr. w/o ISP	#2651	13.8	12.9	10.2	11.1	12.1	12.4	13	13.7	13.4	13.3	13.1	13.2	13.4	13.4	14.4	13.7	13.6	13.6	14.2	13.8
		#2762	13.6	13.1	10.7	11.5	12.6	13.2	13	13.3	13.9	13.6	13.1	13	14.3	13.9	13.2	14.1	14	14.2	14	14.7
		#2868	13	12.6	9.1	10.6	n.d.	12.7	n.d.	13	n.d.	13.2	12.8	12.7	13.5	13.3	14	13.7	13.8	13.9	13.3	13.9
	Ctr. +ISP	#2650	13.7	12.6	10.9	12	12.9	12.9	13.2	13.6	13.1	13.6	13.8	13.9	13.7	13.6	13.6	13.1	13.3	13.1	13.4	13.4
		#2750	13.7	13.2	11.4	12	12	13.1	13.3	14.1	13.8	14.5	14.5	13.6	14	13.5	13.4	12.9	13.1	13.7	12.9	13.6
		#16299	14.1	13.8	11.7	11.9	12.2	13.4	13.9	14	14.5	14.5	14.2	14.1	14.2	14	13.8	14.3	14.2	14.2	14.3	13.7
		#2735	15	13.7	10.3	12.1	12.8	13.3	13.3	14.1	14.2	14.4	14.2	13.9	14.2	14	14.5	14.2	14.5	14.3	14.4	14.3
	2x EHM	#2907	12.3	11.7	10.9	11.5	11.4	11.9	12.4	12.9	12.9	13.4	12.6	12.7	13.7	14	12.5	12.4	13.5	13	13.3	12.3
		#16356	13.8	12.8	9.6	11.1	12.4	13	13.2	14.1	13.4	13.8	12.9	12.6	12.6	13.1	13.4	12.9	13.2	13.4	13.4	13.6
		#16721	14.6	14.2	13.5	14	13.5	13.6	14.8	14.6	14.4	15.1	13.4	13.5	12.5	14.7	14.7	14.3	14.6	14.9	14.6	15
	5x EHM	#2819	13.3	12.8	10.6	12.1	12.2	12.4	13.3	13.6	13.7	13.4	13	12.4	13.8	13.5	13.2	13.9	13.1	13	12.9	12.6
		#2884	13.3	12.4	11.8	12.1	n.d.	12.4	n.d.	13.5	13.7	13.2	12.9	12.7	13.4	12.9	14	12.5	12.5	11.6	12.4	11.6
		#16441	14.4	14	n.d.	12.8	n.d.	14.3	n.d.	15.2	15.7	15.7	14	13.9	14	14.7	15.1	15	15	14.6	14.5	14.7
				pre I/R								pre EHM
Hematocrit in % (human reference range [♀] 35-46 and [♂] 39-51 g/dL)
				Days post EHM implantation
	Group	Macaque	Pre	0	8	15	28	42	56	71	84	112	140	168
Cohort 1	Tacro + MP	#2444	40.1	37.9	36.9	34.6	39.3	38.2	39.5	39.8	41
	Tacrolimus	#2529	37.8	40.5	36.2	36.2	35.3	37	39.4	39.5	39.6
	Tacro + MP	#2441	44.7	48.1	41.9	40.6	46.2	43.8	42.4	41.7	44.5
	Tacrolimus	#2616	40.9	41.1	37.9	38.9	39.3	40.4	37.8	40.8	40.6
	Tacro + MP	#2520	41	43.3	41.1	38.3	39.5	41.1	41.3	42.4	41.9
	Tacro + MP	#2551	40.5	40.8	35.9	33.3	37.3	37.1	39.2	38.3	38.4
	no ISP	#2483	43.1	42.4	36	36.7	42.1	41.9	45	43.5	44
Cohort 2	Tacro + MP	#2506	44.8	42.2	39.4	36.8	38.5	39.2	40.1	39.7	39.8	40.8	38.5	39.1
	Tacro + MP	#2913	41.6	41.2	39.1	37.1	39.6	39	38.6	42.2	40.8	42.1	38.9	38.8
	Tacro + MP	#2909	40.4	43	41.5	41.2	42.3	41.3	41.6	43.3	41	41.1	40.4	40.7
	Tacro + MP*	#2887	45.5	44.2	39.5	40.2	42.9	41.8	42.9	44	43.4	43	42.8	44.6	*withdrawal of ISP after 3 months
	Tacro + MP*	#2869	43.7	36.8	41.5	43.3	44.3	43.4	44.7	43.2	44	40.7	43.3	43.7	*withdrawal of ISP after 3 months
	no ISP	#2500	41.8	43.4	41.5	38.9	40.3	40.8	41.7	41.3	41.2	42	39.7	41.6
	Cyclosporin	#2915	44.6	44.4	38.2	40.6	40.5	40.1	37.8	42.2	41	44.5	37.4	41.2
				pre I/R
			Days pre EHM Implantation										Days post EHM implantation
	Group	Macaque	-181	-160	-153	-146	-139	-130	-118	-105	-21	0	7	14	26	41	55	70	84	112	141	166
Cohort 3	Ctr. w/o ISP	#2651	41.1	38.7	32.7	36.2	40.1	40.2	42.3	45.2	41.7	41.5	39	42.5	43.3	42.8	46.1	42.4	43.7	42.5	47.2	43.2
		#2762	41.2	38.8	33.2	35	37.3	41	41	41	43.3	41.7	40.2	40.2	44.5	42.7	42.4	44	43.1	44	44.2	44.3
		#2868	39.7	39.4	27.9	33.8	n.d.	39.5	n.d.	40.3	n.d.	40.9	40.4	40.1	42.1	42.9	45.3	43.3	44.5	43.7	43	44
	Ctr. +ISP	#2650	39.2	40	35.4	40.1	41.6	42.4	43.1	44.6	42	42.3	43.6	42.9	42.5	42.1	42.3	41.8	43.1	40.8	42.6	42.3
		#2750	43.5	41.9	34.5	38.8	40.7	44.6	42.1	44.4	42.4	46.9	45.3	42.5	44.4	42.5	41.6	40.2	42.2	41.9	40.4	42
		#16299	44.7	44.8	37.9	39.2	39.1	42.8	44.2	45.2	47	44.4	43.6	43.8	43.9	43.8	43.4	45.1	43.7	44.6	44.4	42.4
		#2735	46.2	41.9	31.8	37.1	40.9	43.3	41.3	45.4	45.2	46.1	43.9	42.4	43.4	43.8	44.7	43.9	44.6	43.2	45.2	43.5
	2x EHM	#2907	38.5	36.1	34.4	36	36.1	40	39	38.7	41.3	41.9	40.5	40.1	41.9	44.1	37.3	36.3	40.2	39	39.6	37
		#16356	43	40.3	30.3	34.3	39.3	40.8	41.9	44.2	41.5	43.4	40.3	40.1	38.8	40.3	40.6	40.3	41.1	42.6	41.2	41.8
		#16721	45.8	44.7	43	43.4	43.2	43.5	47.1	42.9	46.3	46.2	41.5	42.8	39.2	47.1	46.8	44.6	44.8	45.6	46.1	49
	5x EHM	#2819	41.9	41.6	32.9	39	38.8	40.8	42.7	43.7	44	42.3	41.2	38.8	42.3	43.3	40.6	42.8	40.3	39.7	39.5	37.3
		#2884	40.5	39.4	37.7	39.1	n.d.	39.5	n.d.	43.2	44.6	41.6	40	39.1	41.7	39.9	42.8	36.1	36.1	35.9	39.2	36.1
		#16441	44.8	45.4	n.d.	40.3	n.d.	45.9	n.d.	49.3	50.4	48.4	43.6	42.1	43.3	46.2	47.2	47.3	46	44.2	45.1	44.1
				pre I/R								pre EHM
MCH in pg (human reference range 26-32 pg)
				Days post EHM implantation
	Group	Macaque	Pre	0	8	15	28	42	56	71	84	112	140	168
Cohort 1	Tacro + MP	#2444	23.2	22.9	22.6	22.7	22.6	23.3	22.7	22.8	22.9
	Tacrolimus	#2529	24.4	24	24.2	23.2	24.7	23.9	23.7	23.6	23.2
	Tacro + MP	#2441	24.5	24.8	24.8	24.8	24.1	24.2	24.7	24.4	24.2
	Tacrolimus	#2616	24	22.6	22.8	22.7	22.7	22.4	22.6	22.6	22.9
	Tacro + MP	#2520	24.2	24.2	24.1	25.2	24.4	24.6	24.2	23.5	24.8
	Tacro + MP	#2551	23.7	23.4	23.7	23	24	23.9	23.8	24	23.6
	no ISP	#2483	25.4	25.8	25.7	25.6	25.5	24.6	25.5	24.3	24.5
Cohort 2	Tacro + MP	#2506	23.1	23.4	21.8	22.7	23.5	22.1	23.2	23.3	22.8	23.2	22.3	23.2
	Tacro + MP	#2913	23	23	22.9	23.4	23.6	23.4	24.1	23.1	22	22.5	22.8	23.8
	Tacro + MP	#2909	23.2	22.4	22.6	22.2	22.5	23.3	22.4	22	22.3	21.8	22	23
	Tacro + MP*	#2887	23.7	22.7	24.3	22.9	22.8	23.7	22.6	22.9	22.6	22.4	23	22	*withdrawal of ISP after 3 months
	Tacro + MP*	#2869	23.8	24.3	24	23.3	23.3	23.2	22.4	22.8	21.9	23.5	22.7	22.5	*withdrawal of ISP after 3 months
	no ISP	#2500	23.7	22.3	24	23.8	23.3	23.4	23.7	23	23.8	23	23.2	23.9
	Cyclosporin	#2915	24.1	24.3	24.5	23.8	23.4	23.4	24.8	23.8	24	24.2	24.3	24.3
				pre I/R
			Days pre EHM Implantation										Days post EHM implantation
	Group	Macaque	-181	-160	-153	-146	-139	-130	-118	-105	-21	0	7	14	26	41	55	70	84	112	141	166
Cohort 3	Ctr. w/o ISP	#2651	23.5	23.5	22.3	23	22.6	22.9	22.7	21.9	23.2	23.6	24.2	23	23.1	23.2	23.1	23.7	22.9	23.5	22	23.8
		#2762	23.3	22.9	22.7	23.2	23.5	22.6	22.2	22.4	22.4	23.1	23.1	22.9	23	23.4	22.8	23	23.1	22.9	22.5	23.6
		#2868	24.7	23.6	24.2	23.6	n.d.	24.2	n.d.	23.8	n.d.	23.7	23.3	23.9	24.4	23.8	23.4	24.1	23.4	23.9	23.5	24.2
	Ctr. +ISP	#2650	24.7	23.2	22.9	22.7	23.5	22.9	23.2	22.7	22.9	24	23.1	23.7	23.5	23.6	23.5	22.9	22.7	23.3	22.8	23.1
		#2750	24.6	24.8	25.6	24.5	23.3	23.2	24.4	24.4	24.9	24.1	25	24.8	24.4	24.5	25.1	25	24.2	25.4	24.6	24.9
		#16299	23.9	23.4	23.5	23.5	24	24.5	24.3	24.1	23.6	24.8	24.4	24.3	24.4	24.4	24.2	24	24.4	24.1	24.3	24.7
		#2735	24	24	23.9	24.2	23.8	23.2	23.8	22.5	22.5	22.8	23.4	23.6	23.8	22.9	23.3	23.2	23	23.3	21.8	22.7
	2x EHM	#2907	24.2	23.7	23.9	24.5	24.2	23.4	24.4	25.3	24.2	24.6	24.3	24.4	23.9	23.1	24.2	24.5	24	24	23.6	23.3
		#16356	26.8	26.3	26.3	27.6	27.2	27.3	26.3	26.2	26.5	25.8	25.7	25.2	26	26	26.3	25.5	25.6	24.5	26	26.1
		#16721	25.3	25.3	25.2	26.2	25.3	25.1	25.4	27.3	24.9	25.7	25.3	25	25	24.7	24.7	25	25.1	25	24.3	24.2
	5x EHM	#2819	25.4	24.9	26	25.3	25.9	25.1	25.5	25.4	25.1	25.2	25	25	25.2	23.2	23.9	23.7	23.9	23.6	23.4	23.9
		#2884	24.3	23.3	23.2	23.4	n.d.	23.8	n.d.	23.1	23.1	23.6	23.9	23.8	23.2	22.7	22.4	22.8	22.7	22	21.7	22.1
		#16441	25.7	24.8	n.d.	25.8	n.d.	24.7	n.d.	24.4	24.3	24.8	24.4	25.1	24.8	24.9	24.8	24.6	25.4	25.3	24.7	25.5
				pre I/R								pre EHM
MCHC in g/dL (human reference range 32-36 g/dL)
				Days post EHM implantation
	Group	Macaque	Pre	0	8	15	28	42	56	71	84	112	140	168
Cohort 1	Tacro + MP	#2444	32.4	31.8	31.2	31.7	31.5	32.8	31.8	32.4	32
	Tacrolimus	#2529	31.8	31.7	32.5	31.4	33.9	32.4	32.6	32.6	31.8
	Tacro + MP	#2441	31.7	32.9	32.7	32.7	31.8	32.4	32.5	32.7	32.3
	Tacrolimus	#2616	32.3	30.9	31.8	30.9	31.3	30.7	31.3	31	31.3
	Tacro + MP	#2520	31.8	32	32.7	33.5	33.8	32.9	32.7	31.1	32.9
	Tacro + MP	#2551	32.2	32.3	32.6	31.8	33.1	32.9	33.2	33.2	32.1
	no ISP	#2483	31.7	32.8	32.4	32	31.9	31	32.1	31.1	31.1
Cohort 2	Tacro + MP	#2506	32.1	32.3	30.1	31.3	32.6	30.7	32.1	32.8	32.2	33.2	31.3	32.3
	Tacro + MP	#2913	31.8	31.7	31.5	32.4	32.5	32.7	34.5	33.7	32.8	33	32.7	34.2
	Tacro + MP	#2909	31.5	30.7	31.2	30.7	30.9	31.9	31	30.6	31.3	30.7	31.1	32.4
	Tacro + MP*	#2887	32	30.9	33.9	31.3	31.1	32.4	31.3	31.9	31.6	30.9	31.4	30.1	*withdrawal of ISP after 3 months
	Tacro + MP*	#2869	32.2	34.8	32.5	31.3	31.3	32	31.2	31.9	30.9	32.5	30.6	30.5	*withdrawal of ISP after 3 months
	no ISP	#2500	32	30.2	32.2	32.2	31.4	32.3	32.3	31.5	32.6	31.4	31.4	32.4
	Cyclosporin	#2915	31.8	32	32.7	31.7	31.3	31.8	33.2	31.1	32.1	32.4	33.5	31.9
				pre I/R
			Days pre EHM Implantation										Days post EHM implantation
	Group	Macaque	-181	-160	-153	-146	-139	-130	-118	-105	-21	0	7	14	26	41	55	70	84	112	141	166
Cohort 3	Ctr. w/o ISP	#2651	33.6	33.3	31.2	30.8	30.1	30.8	30.8	30.4	32.1	32.1	33.6	31	31	31.2	31.2	32.4	31.1	32.1	30	32
		#2762	33	33.8	32.2	32.8	33.8	32	31.7	32.6	32.2	32.7	32.6	32.4	32.1	32.5	31.2	32	32.5	32.3	31.7	33.1
		#2868	32.8	32	32.6	31.4	n.d.	32.1	n.d.	32.4	n.d.	32.2	31.6	31.7	32.1	31	30.9	31.7	31	31.7	30.9	31.6
	Ctr. +ISP	#2650	34.9	31.4	30.9	30	30.9	30.4	30.7	30.5	31.2	32.3	31.6	32.4	32.2	32.4	32	31.4	30.9	32.2	31.5	31.8
		#2750	31.6	31.6	32.9	30.9	29.5	29.4	31.6	31.7	32.6	30.9	32.1	31.9	31.5	31.9	32.2	32	31.1	32.8	31.8	32.4
		#16299	31.6	30.8	31	30.5	31.3	31.3	31.4	31.1	30.9	32.7	32.5	32.3	32.3	32	31.9	31.7	32.4	31.9	32.1	32.4
		#2735	32.6	32.7	32.3	32.6	31.4	30.8	32.3	31.1	31.4	31.3	32.3	32.8	32.8	32	32.4	32.5	32.6	33	31.8	32.9
	2x EHM	#2907	32	32.3	31.6	31.8	31.4	29.8	31.8	33.4	31.1	32	31.2	31.7	32.8	31.8	33.4	34.1	33.6	33.4	33.5	33.2
		#16356	32.2	31.8	31.6	32.4	31.6	32	31.5	31.8	32.4	31.8	32	31.4	32.5	32.6	32.9	32.1	32	31.3	32.6	32.5
		#16721	32	31.7	31.4	32.3	31.3	31.2	31.3	34	31.1	32.7	32.3	31.6	31.7	31.1	31.4	32	32.6	32.7	31.7	30.7
	5x EHM	#2819	31.6	30.7	32.3	31.1	31.6	30.4	31.1	31.2	31.2	31.6	31.6	31.9	32.6	31.1	32.4	32.4	32.5	32.7	32.7	33.9
		#2884	32.7	31.4	31.4	30.9	n.d.	31.2	n.d.	31.3	30.7	31.7	32.4	32.4	32.2	32.4	32.6	34.6	34.7	32.3	31.6	32.2
		#16441	32.1	30.8	n.d.	31.9	n.d.	31.1	n.d.	30.9	31.2	32.5	32.1	33	32.2	31.7	32	31.7	32.7	33	32.2	33.3
				pre I/R								pre EHM
MCV in fl (human reference range 81-95 fl)
				Days post EHM implantation
	Group	Macaque	Pre	0	8	15	28	42	56	71	84	112	140	168
Cohort 1	Tacro + MP	#2444	72	72	72	72	72	71	71	70	72
	Tacrolimus	#2529	77	76	74	74	73	74	73	73	73
	Tacro + MP	#2441	77	76	76	76	76	75	76	75	75
	Tacrolimus	#2616	74	73	72	74	72	73	72	73	73
	Tacro + MP	#2520	76	76	74	75	72	75	74	76	75
	Tacro + MP	#2551	74	72	73	72	72	73	72	72	74
	no ISP	#2483	80	79	79	80	80	79	79	78	79
Cohort 2	Tacro + MP	#2506	72	73	73	72	72	72	72	71	71	70	71	72
	Tacro + MP	#2913	72	72	73	72	72	72	70	69	67	68	70	70
	Tacro + MP	#2909	74	73	72	72	73	73	72	72	71	71	71	71
	Tacro + MP*	#2887	74	73	72	73	73	73	72	72	71	72	73	73	*withdrawal of ISP after 3 months
	Tacro + MP*	#2869	74	70	74	74	74	72	72	72	71	72	74	74	*withdrawal of ISP after 3 months
	no ISP	#2500	74	74	75	74	74	72	73	73	73	73	74	74
	Cyclosporin	#2915	76	76	75	75	75	74	75	76	75	75	73	76
				pre I/R
			Days pre EHM Implantation										Days post EHM implantation
	Group	Macaque	-181	-160	-153	-146	-139	-130	-118	-105	-21	0	7	14	26	41	55	70	84	112	141	166
Cohort 3	Ctr. w/o ISP	#2651	70	70	71	75	75	74	74	72	72	73	72	74	74	74	74	73	74	73	73	74
		#2762	71	68	70	71	70	70	70	69	70	71	71	71	72	72	73	72	71	71	71	71
		#2868	75	74	74	75	n.d.	75	n.d.	73	n.d.	74	74	75	76	77	76	76	75	76	76	76
	Ctr. +ISP	#2650	71	74	74	76	76	75	76	74	73	74	73	73	73	73	73	73	74	72	72	73
		#2750	78	78	78	79	79	79	77	77	76	78	78	78	77	77	78	78	78	77	77	77
		#16299	76	76	76	77	77	78	77	77	76	76	75	75	76	76	76	76	75	76	76	76
		#2735	74	73	74	74	76	75	74	72	71	73	72	72	72	72	72	71	71	70	68	69
	2x EHM	#2907	76	73	76	77	77	79	77	76	78	77	78	77	73	73	72	72	71	72	70	70
		#16356	83	83	83	85	86	85	84	82	82	81	80	80	80	80	80	79	80	78	80	80
		#16721	79	80	80	81	81	81	81	80	80	79	78	79	79	79	78	78	77	76	76	79
	5x EHM	#2819	80	81	81	81	82	83	82	81	81	80	79	78	77	74	74	73	73	72	72	70
		#2884	74	74	74	76	n.d.	76	n.d.	74	75	74	74	74	72	70	69	66	66	68	68	69
		#16441	80	80	n.d.	81	n.d.	80	n.d.	79	78	76	76	76	77	78	78	78	78	77	77	77
				pre I/R								pre EHM
